# Supplementary material for: Iron-catalyzed domino decarboxylation-oxidation of α,β-unsaturated carboxylic acids enabled aldehyde C–H methylation
Source: Royal Society of Chemistry journal article supplement (doi:10.1039/d1cc01536b), 2021-01-01

– Supporting Information –

---

**Table of Contents**

| Content                                                                                                              | Page |
|----------------------------------------------------------------------------------------------------------------------|------|
| 1. General Information                                                                                               | S3   |
| 2. General Procedure for the Synthesis of ( <i>E</i> )-3-Substituted-Acrylic Acid Compounds                          | S3   |
| 3. Products from Iron-Catalyzed Domino Decarboxylation-Oxidation of $\alpha,\beta$ -<br>Unsaturated Carboxylic Acids | S4   |
| 4. Preliminary Mechanistic Studies                                                                                   | S14  |
| 5. References                                                                                                        | S16  |
| 6. Copies of NMR Spectra                                                                                             | S17  |

---

## 1. General Information

All reactions were carried out under air atmosphere unless otherwise noted. All reagents and solvents were obtained from commercial suppliers such as FeCl<sub>2</sub> (anhydrous, 99.99% pure) from Aldrich, PMHS [CAS:9004-73-3, 15 to 40 mPa.s (at 20°C)] from Acros, and used without further purification. Reactions were monitored by thin layer chromatography (TLC) carried out on 0.25 mm Yantai silica plates (GF-254), using shortwave UV light (254nm) as the visualizing agent or iodine (mixed with silica gel) stain in case of no UV activity. Flash column chromatography was performed using Yantai silica gel (300-400 mesh). <sup>1</sup>H (400 MHz), <sup>19</sup>F (400 MHz), and <sup>13</sup>C NMR spectra (100 MHz) of solutions in CDCl<sub>3</sub> or CD<sub>3</sub>COCD<sub>3</sub>-*d*<sub>6</sub> were recorded on a Bruker Avance 400 NMR spectrometer. Chemical shifts were expressed in parts per million (ppm) downfield from tetramethylsilane and refer to the solvent signals (CDCl<sub>3</sub>: δ<sub>H</sub> 7.26 and δ<sub>C</sub> 77.0 ppm; CD<sub>3</sub>COCD<sub>3</sub>-*d*<sub>6</sub>: δ<sub>H</sub> 2.05 and δ<sub>C</sub> 29.8 ppm). The signals of water were observed at about 1.58 ppm in CDCl<sub>3</sub> and 2.84 ppm in CD<sub>3</sub>COCD<sub>3</sub>-*d*<sub>6</sub>, respectively. Abbreviations for signal couplings are: br, broad; s, singlet; d, doublet; t, triplet; m, multiplet; dd, doublet of doublets; dt, triplet of doublets; td, doublet of triplets; tt, triplet of triplets; tdd, doublet of doublet of triplets. Coupling constants, *J*, were reported in hertz unit (Hz). HRMS was performed on a Q-TOF mass spectrometer. Infrared spectra of neat substances were recorded on a Thermo Nicolet Corporation GC-FTIR NEXUS670 spectrometer. ICP-AES analysis was measured on a Prodigy (LEEMAN LABS INC.) machine. GC-MS were determined with Agilent 7890-5975C. The gaseous products was detected using a GC-7920 Gas Chromatograph (Beijing Zhong Jiao Jin Yuan Technology Co., Ltd., Beijing, China) equipped with a FID detector (N<sub>2</sub> as carrier gas).

## 2. General procedure for the synthesis of (*E*)-3-substituted-acrylic acid compounds

To a degassed solution of aldehyde (0.5 mmol) in pyridine (2 mL) was added piperidine (25 μL, 0.25 mmol) and malonic acid (132.7 mg, 1.25 mmol). The resulting mixture was refluxed under N<sub>2</sub> for 12 h. The solvent was removed under reduced pressure. The residue was taken up in water that was acidified (pH = 2) with concentrated HCl; the resulting precipitate was collected, washed with water, and dried under reduced pressure to afford corresponding (*E*)-3-substituted-acrylic acid. The crude product was used in the next step without further purification.

---

*Gram-scale experiment:* To a degassed solution of 4-methoxybenzaldehyde (1.36 g, 10 mmol) in pyridine (40 mL) was added piperidine (500  $\mu$ L, 5 mmol) and malonic acid (2.65 g, 25 mmol). The resulting mixture was refluxed under  $N_2$  for 12 h. The solvent was removed under reduced pressure. The residue was taken up in water that was acidified (pH = 2) with concentrated HCl; the resulting precipitate was collected by filtration and recrystallized from anhydrous ethanol to afford product. The residue was taken up in anhydrous ethanol and recrystallized to afford product **2e** in 88% yield.

### **3. Products from Iron-Catalyzed Domino Decarboxylation-Oxidation of $\alpha,\beta$ -Unsaturated Carboxylic Acids**

*General Procedure A:* A 25 mL flask was charged with  $FeCl_2$  (0.025 mmol, 3.2 mg), cinnamic acid (0.25 mmol), EtOH (2 mL), and PMHS (0.75 mmol, 170  $\mu$ L). The reaction mixture was stirred under air atmosphere at 80  $^{\circ}C$  until the reaction was complete (observed by TLC). After the mixture was cooled to room temperature, filtered through Celite and then washed with ethyl acetate (3 x 5 mL). The organic phases were combined and concentrated to give the crude product. The residue was purified by column chromatography (Petroleum ether/ ethyl acetate) on silica gel to afford the corresponding product.

*General Procedure B:* A 25 mL flask was charged with  $FeCl_2$  (0.050 mmol, 6.4 mg), cinnamic acid (0.25 mmol), *t*BuOH (2 mL), and PMHS (0.75 mmol, 170  $\mu$ L). The reaction mixture was stirred under air atmosphere at 80  $^{\circ}C$  until the reaction was complete (observed by TLC). After the mixture was cooled to room temperature, filtered through Celite and then washed with ethyl acetate (3 x 5 mL). The organic phases were combined and concentrated to give the crude product. The residue was purified by column chromatography (Petroleum ether/ ethyl acetate) on silica gel to afford the corresponding product.

*General Procedure C:* A 25 mL flask was charged with  $FeCl_2$  (0.075 mmol, 9.6 mg), cinnamic acid (0.25 mmol), EtOH (2 mL), and PMHS (0.75 mmol, 170  $\mu$ L). The reaction mixture was stirred under air atmosphere at 80  $^{\circ}C$  until the reaction was complete (observed by TLC). After the mixture was cooled to room temperature, filtered through Celite and then washed with ethyl

acetate (3 x 5 mL). The organic phases were combined and concentrated to give the crude product. The residue was purified by column chromatography (Petroleum ether/ ethyl acetate) on silica gel to afford the corresponding product.

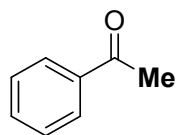

**Acetophenone (3a):** Following *general procedure A*, **3a** was isolated as a colorless liquid (28.5 mg, 95%), known compound; The NMR spectroscopic data agree with those described in ref.<sup>[S1]</sup>. <sup>1</sup>H NMR (400 MHz, CDCl<sub>3</sub>): δ 7.96 (d, *J* = 7.2 Hz, 2 H), 7.56 (t, *J* = 7.6 Hz, 1 H), 7.46 (t, *J* = 8.0 Hz, 2 H), 2.60 ppm (s, 3 H); <sup>13</sup>C NMR (100 MHz, CDCl<sub>3</sub>): δ 198.2, 137.0, 133.1, 128.5, 128.2, 26.6 ppm.

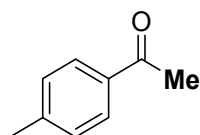

**1-(*p*-Tolyl)ethanone (3b):** Following *general procedure A*, **3b** was isolated as a yellow liquid (29.1 mg, 87%), known compound; The NMR spectroscopic data agree with those described in ref.<sup>[S1]</sup>. <sup>1</sup>H NMR (400 MHz, CDCl<sub>3</sub>): δ 7.87 (d, *J* = 8.4 Hz, 2 H), 7.27 (d, *J* = 8.0 Hz, 2 H), 2.59 (s, 3 H), 2.42 ppm (s, 3 H); <sup>13</sup>C NMR (100 MHz, CDCl<sub>3</sub>): δ 197.8, 143.8, 134.6, 129.2, 128.4, 26.5, 21.6 ppm.

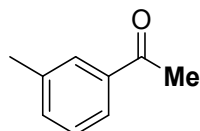

**1-(*m*-Tolyl)ethanone (3c):** Following *general procedure A*, **3c** was isolated as a yellow liquid (30.2 mg, 90%), known compound; The NMR spectroscopic data agree with those described in ref.<sup>[S2]</sup>. <sup>1</sup>H NMR (400 MHz, CDCl<sub>3</sub>): δ 7.77-7.74 (m, 2 H), 7.38-7.32 (m, 2 H), 2.59 (s, 3 H), 2.40 ppm (s, 3 H); <sup>13</sup>C NMR (100 MHz, CDCl<sub>3</sub>): δ 198.4, 138.3, 137.0, 133.8, 128.7, 128.4, 125.5, 26.6, 21.3 ppm.

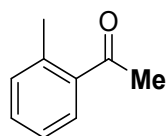

**1-(*o*-Tolyl)ethanone (3d):** Following *general procedure A*, **3d** was isolated as a yellow liquid (29.8 mg, 89%), known compound; The NMR spectroscopic data agree with those described in ref.<sup>[S2]</sup>. <sup>1</sup>H NMR (400 MHz, CDCl<sub>3</sub>): δ 7.70 (dd, *J* = 7.6 Hz, 0.8 Hz, 1 H), 7.38 (td, *J* = 7.2 Hz, 1.2 Hz, 1 H), 7.28-7.23 (m, 2 H), 2.58 (s, 3 H), 2.53 ppm (s, 3 H); <sup>13</sup>C NMR (100 MHz, CDCl<sub>3</sub>): δ 201.7, 138.4, 137.5, 132.0, 131.5, 129.3, 125.6, 29.5, 21.6 ppm.

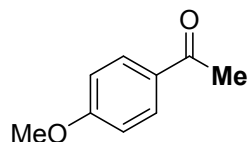

**1-(4-Methoxyphenyl)ethanone (3e):** Following *general procedure A*, **3e** was isolated as a yellow liquid (34.1 mg, 91%), known compound; The NMR spectroscopic data agree with those described in ref.<sup>[S1]</sup>. <sup>1</sup>H NMR (400 MHz, CDCl<sub>3</sub>): δ 7.94 (dt, *J* = 8.8 Hz, 2.4 Hz, 2 H), 6.93 (dt, *J* = 8.8 Hz, 2.4 Hz, 2 H), 3.87 (s, 3 H), 2.55 ppm (s, 3 H); <sup>13</sup>C NMR (100 MHz, CDCl<sub>3</sub>): δ 196.8, 163.4, 130.6, 130.3, 113.6, 55.4, 26.3 ppm.

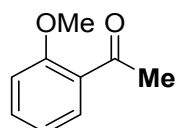

**1-(2-Methoxyphenyl)ethanone (3f):** Following *general procedure A*, **3f** was isolated as a yellow liquid (33.8 mg, 90%), known compound; The NMR spectroscopic data agree with those described in ref.<sup>[S1]</sup>. <sup>1</sup>H NMR (400 MHz, CDCl<sub>3</sub>): δ 7.74 (dd, *J* = 7.6 Hz, 1.6 Hz, 1 H), 7.49-7.44 (m, 1 H), 7.02-6.96 (m, 2 H), 3.91 (s, 3 H), 2.62 ppm (s, 3 H); <sup>13</sup>C NMR (100 MHz, CDCl<sub>3</sub>): δ 199.9, 158.9, 133.7, 130.3, 128.2, 120.5, 111.5, 55.4, 31.9 ppm.

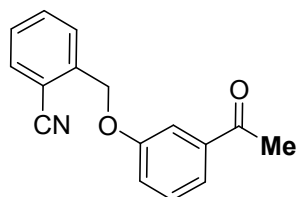

**2-((3-Acetylphenoxy)methyl)benzonitrile (3g):** Following *general procedure A*, **3g** was isolated as a yellow liquid (50.8 mg, 90%), known compound (CAS: 1016691-05-6); <sup>1</sup>H NMR (400 MHz, CDCl<sub>3</sub>): δ 7.72 (d, *J* = 7.6 Hz, 1 H), 7.68 (d, *J* = 7.6 Hz, 1 H), 7.64 (td, *J* = 7.2 Hz, 1.2 Hz, 1 H), 7.60-7.59 (m, 2 H), 7.46 (td, *J* = 7.6 Hz, 1.6 Hz, 1 H), 7.41 (t, *J* = 8.0 Hz, 1 H), 7.22 (ddd, *J* = 8.0 Hz, 2.4 Hz, 0.8 Hz, 1 H), 5.30 (s, 2 H), 2.60 ppm (s, 3 H); <sup>13</sup>C NMR (100 MHz, CDCl<sub>3</sub>): δ 197.7, 158.4, 140.0, 138.6, 133.1, 133.0, 129.8, 128.65, 128.62, 121.9, 120.0, 117.0, 113.8, 111.4, 67.8, 26.7 ppm.

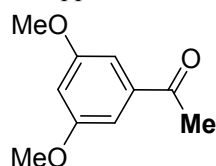

**1-(3,5-Dimethoxyphenyl)ethanone (3h):** Following *general procedure A*, **3h** was isolated as a yellow solid with low melting point (41.4 mg, 92%), known compound; The NMR spectroscopic data agree with those described in ref.<sup>[S3]</sup>. <sup>1</sup>H NMR (400 MHz, CDCl<sub>3</sub>): δ 7.07 (d, *J* = 2.0 Hz, 2 H), 6.63 (t, *J* = 2.0 Hz, 1 H), 3.81 (s, 6 H), 2.55 ppm (s, 3 H); <sup>13</sup>C NMR (100 MHz, CDCl<sub>3</sub>): δ 197.7, 160.8, 139.0, 106.1, 105.2, 55.5, 26.6 ppm.

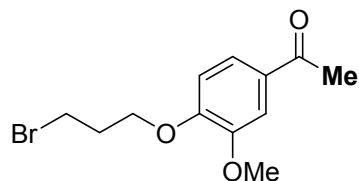

**1-(4-(3-Bromopropoxy)-3-methoxyphenyl)ethanone (3i):** Following *general procedure A*, **3i** was isolated as a yellow oil (21.8 mg, 75%), known compound; The NMR spectroscopic data agree with those described in ref.<sup>[S4]</sup>. <sup>1</sup>H NMR (400 MHz, CDCl<sub>3</sub>): δ 7.47 (d, *J* = 7.6 Hz, 1 H), 7.44 (s, 1 H), 6.84 (d, *J* = 7.2 Hz, 1 H), 4.14-4.13 (m, 2 H), 3.82 (s, 3 H), 3.55-3.54 (m, 2 H), 3.48 (s, 3 H), 2.30 ppm (m, 2 H); <sup>13</sup>C NMR (100 MHz, CDCl<sub>3</sub>): δ 196.8, 152.4, 149.3, 130.7, 123.2, 111.4, 110.5, 66.4, 56.0, 32.0, 29.8, 26.2 ppm.

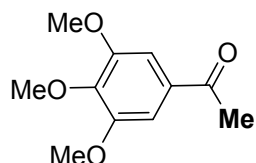

**1-(3,4,5-Trimethoxyphenyl)ethanone (3j):** Following *general procedure A*, **3j** was isolated as a white solid (49.4 mg, 94%), known compound; The NMR spectroscopic data agree with those described in ref.<sup>[S5]</sup>. <sup>1</sup>H NMR (400 MHz, CDCl<sub>3</sub>): δ 7.21 (s, 2 H), 3.92 (s, 6 H), 3.91 (s, 3 H), 2.59 ppm (s, 3 H); <sup>13</sup>C NMR (100 MHz, CDCl<sub>3</sub>): δ 196.9, 153.0, 142.5, 132.4, 105.8, 60.9, 56.3, 26.4 ppm; Mp: 72.2-72.9 °C.

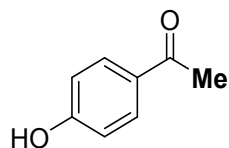

**1-(4-Hydroxyphenyl)ethanone (3k):** Following *general procedure A*, **3k** was isolated as a white solid (30.3 mg, 89%), known compound; The NMR spectroscopic data agree with those described in ref.<sup>[S6]</sup>. <sup>1</sup>H NMR (400 MHz, CDCl<sub>3</sub>): δ 7.92 (dt, *J* = 8.8 Hz, 2.4 Hz, 2 H), 6.94 (dt, *J* = 8.8 Hz, 2.4 Hz, 2 H), 2.59 ppm (s, 3 H); <sup>13</sup>C NMR (100 MHz, CDCl<sub>3</sub>): δ 198.4, 161.1, 131.2, 129.6, 115.5, 26.3 ppm; Mp: 109.5-110.4 °C.

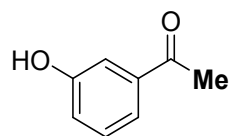

**1-(3-Hydroxyphenyl)ethanone (3l):** Following *general procedure A*, **3l** was isolated as a yellow solid (28.9 mg, 85%), known compound; The NMR spectroscopic data agree with those described in ref.<sup>[S7]</sup>. <sup>1</sup>H NMR (400 MHz, CD<sub>3</sub>COCD<sub>3</sub>): δ 8.76 (s, 1 H), 7.47 (ddd, *J* = 7.6 Hz, 1.6 Hz, 1.2 Hz, 1 H), 7.42 (dd, *J* = 2.0 Hz, 1.6 Hz, 1 H), 7.33 (t, *J* = 8.0 Hz, 1 H), 7.09 (ddd, *J* = 8.4 Hz, 2.4 Hz, 1.2 Hz, 1 H), 2.53 ppm (s, 3 H); <sup>13</sup>C NMR (100 MHz, CD<sub>3</sub>COCD<sub>3</sub>): δ 197.8, 158.4, 139.6, 130.5, 120.8, 120.5, 115.2, 26.8 ppm; Mp: 95.3-96.5 °C.

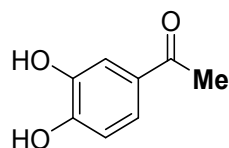

**1-(3,4-Dihydroxyphenyl)ethanone (3m):** Following *general procedure A*, **3m** was isolated as a brown solid (28.1 mg, 74%), known compound; The NMR spectroscopic data agree with those described in ref.<sup>[S8]</sup>. <sup>1</sup>H NMR (400 MHz, CD<sub>3</sub>COCD<sub>3</sub>): δ 8.75 (s, 1 H), 8.39 (s, 1 H), 7.45 (td, *J* = 8.0 Hz, 2.0 Hz, 2 H), 6.90 (d, *J* = 8.4 Hz, 1 H), 2.46 ppm (s, 3 H); <sup>13</sup>C NMR (100 MHz, CD<sub>3</sub>COCD<sub>3</sub>): δ 196.4, 150.9, 145.7, 130.9, 122.8, 115.6, 115.5, 26.3 ppm; Mp: 118.2-119.4 °C.

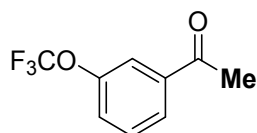

**1-(3-(Trifluoromethoxy)phenyl)ethanone (3n):** Following *general procedure A*, **3n** was isolated as a yellow liquid (47.4 mg, 93%), known compound; The NMR spectroscopic data agree with those described in ref.<sup>[S9]</sup>. <sup>1</sup>H NMR (400 MHz, CDCl<sub>3</sub>): δ 7.88 (d, *J* = 7.6 Hz, 1 H), 7.79 (s, 1 H), 7.51 (t, *J* = 8.0 Hz, 1 H), 7.42 (d, *J* = 8.0 Hz, 1 H), 2.62 ppm (s, 3 H); <sup>13</sup>C NMR (100 MHz, CDCl<sub>3</sub>): δ 196.5, 149.4, 138.8, 130.1, 126.7, 125.4, 120.6, 120.0 (q, *J* = 256 Hz), 26.7 ppm; <sup>19</sup>F NMR (400 MHz, CDCl<sub>3</sub>): -57.9 ppm.

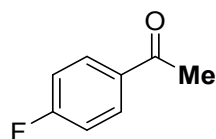

**1-(4-Fluorophenyl)ethanone (3o):** Following *general procedure A*, **3o** was isolated as a yellow liquid (31.7 mg, 92%), known compound; The NMR spectroscopic data agree with those described in ref.<sup>[S2]</sup>. <sup>1</sup>H NMR (400 MHz, CDCl<sub>3</sub>): δ 8.00-7.95 (m, 2 H), 7.15-7.09 (m, 2 H), 2.58 ppm (s, 3 H); <sup>13</sup>C NMR (100 MHz, CDCl<sub>3</sub>): δ 196.5, 165.7 (d, *J* = 253 Hz), 133.5 (d, *J* = 3 Hz), 130.9 (d, *J* = 9 Hz), 115.6 (d, *J* = 22 Hz), 26.5 ppm; <sup>19</sup>F NMR (400 MHz, CDCl<sub>3</sub>): -105.3 ppm.

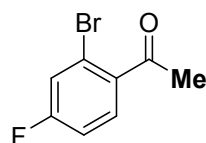

**1-(2-Bromo-4-fluorophenyl)ethanone (3p):** Following *general procedure A*, **3p** was isolated as a yellow liquid (48.6 mg, 90%), known compound (CAS: 1006-39-9); <sup>1</sup>H NMR (400 MHz, CDCl<sub>3</sub>): δ 7.55 (dd, *J* = 8.4 Hz, 6.0 Hz, 1 H), 7.37 (dd, *J* = 8.0 Hz, 2.4 Hz, 1 H), 7.11-7.06 (m, 1 H), 2.63 ppm (s, 3 H); <sup>13</sup>C NMR (100 MHz, CDCl<sub>3</sub>): δ 199.6, 163.3 (d, *J* = 254 Hz), 137.3 (d, *J* = 3 Hz), 131.2 (d, *J* = 9 Hz), 121.3 (d, *J* = 25 Hz), 120.3 (d, *J* = 10 Hz), 114.7 (d, *J* = 21 Hz), 30.2 ppm; <sup>19</sup>F NMR (400 MHz, CDCl<sub>3</sub>): -106.9 ppm.



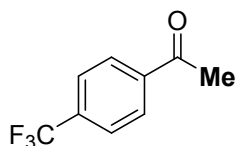

**1-(4-(Trifluoromethyl)phenyl)ethanone (3q):** Following *general procedure A*, **3q** was isolated as a yellow solid (39.0 mg, 82%), known compound; The NMR spectroscopic data agree with those described in ref.<sup>[S2]</sup>. <sup>1</sup>H NMR (400 MHz, CDCl<sub>3</sub>): δ 8.06 (d, *J* = 8.0 Hz, 2 H), 7.73 (d, *J* = 8.4 Hz, 2 H), 2.65 ppm (s, 3 H); <sup>13</sup>C NMR (100 MHz, CDCl<sub>3</sub>): δ 197.0, 139.6 (d, *J* = 1 Hz), 134.4 (d, *J* = 33 Hz), 128.6, 125.6 (d, *J* = 4 Hz), 123.6 (d, *J* = 271 Hz), 26.8 ppm; <sup>19</sup>F NMR (400 MHz, CDCl<sub>3</sub>): -63.1 ppm; Mp: 31.3-31.9 °C.

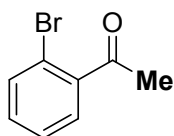

**1-(2-Bromophenyl)ethanone (3r):** Following *general procedure A*, **3r** was isolated as a yellow liquid (44.8 mg, 90%), known compound; The NMR spectroscopic data agree with those described in ref.<sup>[S1]</sup>. <sup>1</sup>H NMR (400 MHz, CDCl<sub>3</sub>): δ 7.60 (dd, *J* = 8.0 Hz, 1.2 Hz, 1 H), 7.46 (dd, *J* = 7.6 Hz, 1.6 Hz, 1 H), 7.36 (td, *J* = 7.6 Hz, 1.2 Hz, 1 H), 7.29 (td, *J* = 7.6 Hz, 1.6 Hz, 1 H), 2.63 ppm (s, 3 H); <sup>13</sup>C NMR (100 MHz, CDCl<sub>3</sub>): δ 201.5, 141.4, 133.9, 131.8, 128.9, 127.5, 118.9, 30.4 ppm.

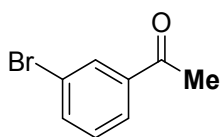

**1-(3-Bromophenyl)ethanone (3s):** Following *general procedure A*, **3s** was isolated as a yellow liquid (45.8 mg, 92%), known compound; The NMR spectroscopic data agree with those described in ref.<sup>[S10]</sup>. <sup>1</sup>H NMR (400 MHz, CDCl<sub>3</sub>): δ 8.06 (t, *J* = 2.0 Hz, 1 H), 7.86 (dt, *J* = 7.6 Hz, 1.2 Hz, 1 H), 7.68-7.65 (m, 1 H), 7.33 (t, *J* = 8.0 Hz, 1 H), 2.58 ppm (s, 3 H); <sup>13</sup>C NMR (100 MHz, CDCl<sub>3</sub>): δ 196.6, 138.6, 135.9, 131.3, 130.1, 126.8, 122.8, 26.6 ppm.

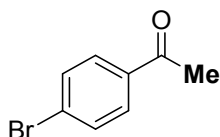

**1-(4-Bromophenyl)ethanone (3t):** Following *general procedure A*, **3t** was isolated as a white solid with low melting point (45.3 mg, 92%), known compound; The NMR spectroscopic data agree with those described in ref.<sup>[S2]</sup>. <sup>1</sup>H NMR (400 MHz, CDCl<sub>3</sub>): δ 7.82 (dt, *J* = 8.4 Hz, 2.0 Hz, 2 H), 7.61 (dt, *J* = 8.4 Hz, 2.0 Hz, 2 H), 2.59 ppm (s, 3 H); <sup>13</sup>C NMR (100 MHz, CDCl<sub>3</sub>): δ 197.0, 135.7, 131.9, 129.8, 128.3, 26.6 ppm.

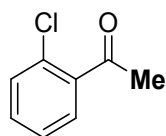

**1-(2-Chlorophenyl)ethanone (3u):** Following *general procedure A*, **3u** was isolated as a yellow liquid (33.1 mg, 86%), known compound; The NMR spectroscopic data agree with those described in ref.<sup>[S11]</sup>. <sup>1</sup>H NMR (400 MHz, CDCl<sub>3</sub>): δ 7.55-7.53 (m, 1 H), 7.42-7.29 (m, 3 H), 2.64 ppm (s, 3 H); <sup>13</sup>C NMR (100 MHz, CDCl<sub>3</sub>): δ 200.5, 139.0, 132.0, 131.2, 130.6, 129.3, 126.9, 30.7 ppm.

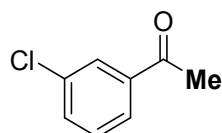

**1-(3-Chlorophenyl)ethanone (3v):** Following *general procedure A*, **3v** was isolated as a yellow liquid (35.0 mg, 91%), known compound; The NMR spectroscopic data agree with those described in ref.<sup>[S11]</sup>. <sup>1</sup>H NMR (400 MHz, CDCl<sub>3</sub>): δ 7.91 (t, *J* = 2.0 Hz, 1 H), 7.82 (dt, *J* = 7.6 Hz, 1.2 Hz, 1 H), 7.53-7.51 (m, 1 H), 7.40 (t, *J* = 8.0 Hz, 1 H), 2.59 ppm (s, 3 H); <sup>13</sup>C NMR (100 MHz, CDCl<sub>3</sub>): δ 196.7, 138.5, 134.8, 133.0, 129.9, 128.3, 126.4, 26.6 ppm.

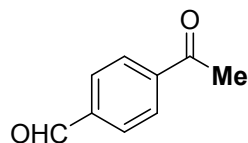

**4-Acetylbenzaldehyde (3w):** Following *general procedure B*, **3w** was isolated as a low melting point (22.8 mg, 62%), known compound; The NMR spectroscopic data agree with those described in ref.<sup>[S2]</sup>. <sup>1</sup>H NMR (400 MHz, CDCl<sub>3</sub>): δ 10.11 (s, 1 H), 8.11 (d, *J* = 8.4 Hz, 2 H), 7.99 (d, *J* = 8.4 Hz, 2 H), 2.67 ppm (s, 3 H); <sup>13</sup>C NMR (100 MHz, CDCl<sub>3</sub>): δ 197.4, 191.6, 141.2, 139.0, 129.8, 128.8, 27.0 ppm.

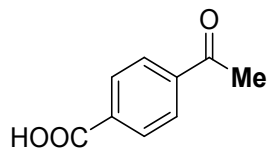

**4-Acetylbenzoic acid (3x):** Following *general procedure A*, **3x** was isolated as a white solid (34.4 mg, 84%), known compound; The NMR spectroscopic data agree with those described in ref.<sup>[S2]</sup>. <sup>1</sup>H NMR (400 MHz, CD<sub>3</sub>COCD<sub>3</sub>): δ 8.17-8.09 (m, 4 H), 2.65 ppm (s, 3 H); <sup>13</sup>C NMR (100 MHz, CD<sub>3</sub>COCD<sub>3</sub>): δ 197.7, 166.9, 141.3, 135.0, 130.6, 129.1, 27.0 ppm; Mp: 207.7-208.5 °C.

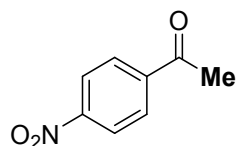

**1-(4-Nitrophenyl)ethanone (3y):** Following *general procedure A*, **3y** was isolated as a yellow solid (35.5 mg, 86%), known compound; The NMR spectroscopic data agree with those described

in ref.<sup>[S11]</sup>. <sup>1</sup>H NMR (400 MHz, CDCl<sub>3</sub>): δ 8.32 (d, *J* = 8.8 Hz, 2 H), 8.11 (d, *J* = 9.2 Hz, 2 H), 2.68 ppm (s, 3 H); <sup>13</sup>C NMR (100 MHz, CDCl<sub>3</sub>): δ 196.3, 150.3, 141.3, 129.3, 123.8, 27.0 ppm; Mp: 81.5-82.8 °C.

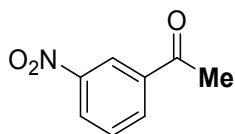

**1-(3-Nitrophenyl)ethanone (3z):** Following *general procedure A*, **3z** was isolated as a yellow solid (31.4 mg, 76%), known compound; The NMR spectroscopic data agree with those described in ref.<sup>[S10]</sup>. <sup>1</sup>H NMR (400 MHz, CDCl<sub>3</sub>): δ 8.77 (t, *J* = 2.0 Hz, 1 H), 8.44-8.41 (m, 1 H), 8.29 (d, *J* = 7.6 Hz, 1 H), 7.69 (t, *J* = 8.0 Hz, 1 H), 2.69 ppm (s, 3 H); <sup>13</sup>C NMR (100 MHz, CDCl<sub>3</sub>): δ 195.7, 148.4, 138.2, 133.8, 129.9, 127.4, 123.2, 26.8 ppm; Mp: 80.7-81.3 °C.

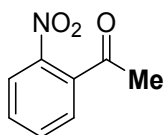

**1-(2-Nitrophenyl)ethanone (3aa):** Following *general procedure A*, **3aa** was isolated as a yellow liquid (21.9 mg, 53%), known compound; The NMR spectroscopic data agree with those described in ref.<sup>[S12]</sup>. <sup>1</sup>H NMR (400 MHz, CDCl<sub>3</sub>): δ 8.10 (d, *J* = 8.0 Hz, 1 H), 7.72 (td, *J* = 7.6 Hz, 1.2 Hz, 1 H), 7.61 (td, *J* = 8.0 Hz, 1.2 Hz, 1 H), 7.43 (dd, *J* = 7.6 Hz, 1.6 Hz, 1 H), 2.56 ppm (s, 3 H); <sup>13</sup>C NMR (100 MHz, CDCl<sub>3</sub>): δ 199.9, 145.7, 138.0, 134.2, 130.6, 127.3, 124.4, 30.2 ppm.

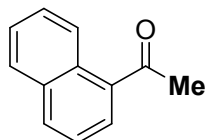

**1-(Naphthalen-1-yl)ethanone (3ab):** Following *general procedure A*, **3ab** was isolated as a yellow liquid (31.5 mg, 74%), known compound; The NMR spectroscopic data agree with those described in ref.<sup>[S12]</sup>. <sup>1</sup>H NMR (400 MHz, CDCl<sub>3</sub>): δ 8.75 (d, *J* = 8.8 Hz, 1 H), 8.00 (d, *J* = 8.4 Hz, 1 H), 7.95 (dd, *J* = 7.2 Hz, 1.2 Hz, 1 H), 7.88 (dd, *J* = 8.4 Hz, 0.8 Hz, 1 H), 7.63-7.59 (m, 1 H), 7.56-7.49 (m, 2 H), 2.76 ppm (s, 3 H); <sup>13</sup>C NMR (100 MHz, CDCl<sub>3</sub>): δ 201.9, 135.4, 133.9, 133.0, 130.1, 128.7, 128.4, 128.1, 126.4, 126.0, 124.3, 30.0 ppm.

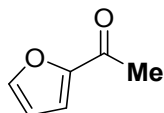

**1-(Furan-2-yl)ethanone (3ac):** Following *general procedure A*, **3ac** was isolated as a yellow liquid (21.8 mg, 79%), known compound; The NMR spectroscopic data agree with those described in ref.<sup>[S2]</sup>. <sup>1</sup>H NMR (400 MHz, CDCl<sub>3</sub>): δ 7.58 (dd, *J* = 2.0 Hz, 0.8 Hz, 1 H), 7.18 (dd, *J* = 3.6 Hz, 0.8 Hz, 1 H), 6.53 (dd, *J* = 3.6 Hz, 1.6 Hz, 1 H), 2.47 ppm (s, 3 H); <sup>13</sup>C NMR (100 MHz, CDCl<sub>3</sub>): δ 186.9, 152.8, 146.5, 117.3, 112.3, 26.1 ppm.

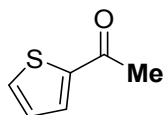

**1-(Thiophen-2-yl)ethanone (3ad):** Following *general procedure A*, **3ad** was isolated as a yellow liquid (27.7 mg, 88%), known compound; The NMR spectroscopic data agree with those described in ref.<sup>[S11]</sup>. <sup>1</sup>H NMR (400 MHz, CDCl<sub>3</sub>): δ 7.69 (dd, *J* = 3.6 Hz, 0.8 Hz, 1 H), 7.63 (dd, *J* = 5.2 Hz, 0.8 Hz, 1 H), 7.11 (dd, *J* = 5.2 Hz, 3.6 Hz, 1 H), 2.55 ppm (s, 3 H); <sup>13</sup>C NMR (100 MHz, CDCl<sub>3</sub>): δ 190.7, 144.5, 133.7, 132.4, 128.0, 26.8 ppm.

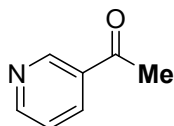

**1-(Pyridin-3-yl)ethanone (3ae):** Following *general procedure C*, **3ae** was isolated as a yellow liquid (16.0 mg, 53%), known compound; The NMR spectroscopic data agree with those described in ref.<sup>[S12]</sup>. <sup>1</sup>H NMR (400 MHz, CDCl<sub>3</sub>): δ 9.11 (dd, *J* = 2.4 Hz, 0.8 Hz, 1 H), 8.72 (dd, *J* = 4.8 Hz, 1.6 Hz, 1 H), 8.18 (dt, *J* = 8.0 Hz, 4.8 Hz, 0.8 Hz, 1 H), 7.37 (ddd, *J* = 8.4 Hz, 0.8 Hz, 1 H), 2.59 ppm (s, 3 H); <sup>13</sup>C NMR (100 MHz, CDCl<sub>3</sub>): δ 196.6, 153.4, 149.8, 135.3, 132.1, 123.5, 26.6 ppm.

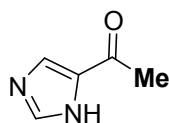

**1-(1*H*-imidazol-5-yl)ethan-1-one (3af):** Following *general procedure C*, **3af** was isolated as a yellow solid (17.6 mg, 64%), known compound (CAS: 61985-25-9); <sup>1</sup>H NMR (400 MHz, CD<sub>3</sub>COCD<sub>3</sub>): δ 11.99 (s, 1H), 7.81 (s, 1 H), 7.79 (s, 1 H), 2.43 ppm (s, 3 H); <sup>13</sup>C NMR (100 MHz, DMSO-*d*<sub>6</sub>): δ 191.2, 138.0, 129.2, 127.7, 26.6 ppm; Mp: 169.7-170.1 °C.

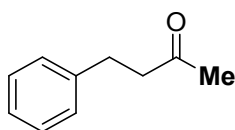

**4-Phenylbutan-2-one (3ai):** Following *general procedure A*, **3ai** was isolated as a colorless liquid (21.8 mg, 75%), known compound; The NMR spectroscopic data agree with those described in ref.<sup>[S13]</sup>. <sup>1</sup>H NMR (400 MHz, CDCl<sub>3</sub>): δ 7.33-7.29 (m, 2 H), 7.23-7.20 (m, 3 H), 2.92 (t, *J* = 7.2 Hz, 2 H), 2.77 (t, *J* = 8.0 Hz, 2 H), 2.15 ppm (s, 3H); <sup>13</sup>C NMR (100 MHz, CDCl<sub>3</sub>): δ 207.6, 140.8, 128.2, 128.0, 125.8, 44.8, 29.8, 29.5 ppm.

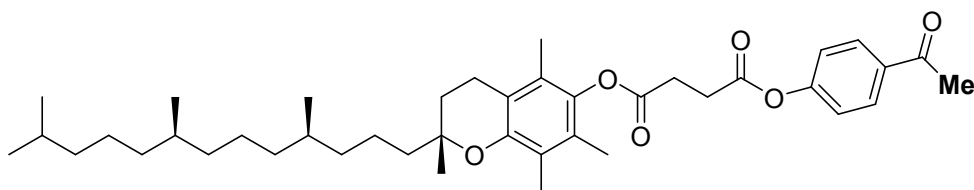

**4-Acetylphenyl ((R)-2,5,7,8-tetramethyl-2-((4R,8R)-4,8,12-trimethyltridecyl)chroman-6-yl)**

**succinate (6a):** Following *general procedure A*, **6a** was isolated as a white solid (99.2 mg, 70%), unknown compound;  $^1\text{H NMR}$  (400 MHz, DMSO):  $\delta$  8.01 (d,  $J = 8.4$  Hz, 2 H), 7.24 (d,  $J = 8.4$  Hz, 2 H), 3.01-3.00 (m, 4 H), 2.57 (s, 3 H), 2.00 (s, 4 H), 1.90 (d,  $J = 19.6$  Hz, 6 H), 1.72 (s, 2 H), 1.51-1.33 (m, 8 H), 1.20 (d,  $J = \text{Hz}$ , 9 H), 1.12-1.03 (m, 8 H), 0.83-0.79 ppm (m, 12 H);  $^{13}\text{C NMR}$  (100 MHz, DMSO):  $\delta$  196.8, 170.8, 170.6, 154.0, 148.6, 140.2, 134.5, 130.7, 129.9, 126.3, 121.9, 117.3, 115.1, 74.8, 36.7, 36.3, 32.0, 28.9, 28.3, 27.4, 26.7, 24.1, 23.7, 22.5, 22.4, 20.3, 19.9, 19.6, 19.5, 12.7, 11.8, 11.5 ppm. HRMS (ESI) calcd. for  $\text{C}_{41}\text{H}_{61}\text{O}_6^+$   $[\text{M} + \text{H}]^+$   $m/z$  649.6448, found 649.6451. IR(KBr): 3423, 2973, 2893, 1834, 1653, 1434, 1178, 1043, 934, 877, 654, 562  $\text{cm}^{-1}$ ; Mp: 245.2-245.7  $^\circ\text{C}$ .

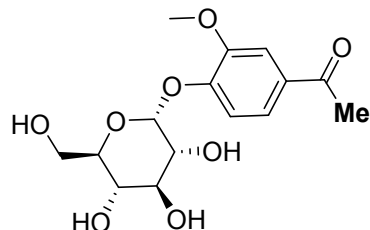

**1-(3-Methoxy-4-(((2R,3R,4S,5S,6R)-3,4,5-trihydroxy-6-(hydroxymethyl)tetrahydro-2H-pyran-2-yl)oxy)phenyl)ethanone (6b):** Raw materials **5b** was synthesized by the method from this article.<sup>[S14]</sup> Following *general procedure A*, **6b** was synthesized by the method from this article<sup>[S14]</sup> and was isolated as a white solid (99.2 mg, 70%), unknown compound;  $^1\text{H NMR}$  (400 MHz, DMSO):  $\delta$  7.58 (dd,  $J = 8.4$  Hz, 2.0 Hz, 1 H), 7.46 (d,  $J = 2.0$  Hz, 1 H), 7.18 (d,  $J = 8.4$  Hz, 1 H), 5.35 (d,  $J = 4.4$  Hz, 1 H), 5.17 (s, 1 H), 5.07 (dd,  $J = 14.8$  Hz, 4.8 Hz, 2 H), 4.57 (t,  $J = 5.6$  Hz, 1 H), 3.82 (s, 3 H), 3.68-3.64 (m, 1 H), 3.38-3.42 (m, 2 H), 3.29-3.27 (m, 2 H), 3.20-3.17 (m, 1 H), 2.53 ppm (s, 3 H);  $^{13}\text{C NMR}$  (100 MHz, DMSO):  $\delta$  196.5, 150.6, 148.7, 130.8, 122.7, 114.1, 110.9, 99.4, 77.1, 76.8, 73.1, 69.5, 60.5, 55.6, 26.4 ppm; HRMS (ESI) calcd. for  $\text{C}_{15}\text{H}_{21}\text{O}_8^+$   $[\text{M} + \text{H}]^+$   $m/z$  329.1236, found 329.1240. IR(KBr): 3152, 2374, 1829, 1744, 1554, 1120, 973, 752, 732, 657, 612  $\text{cm}^{-1}$ ; Mp: 231.3-231.8  $^\circ\text{C}$ .

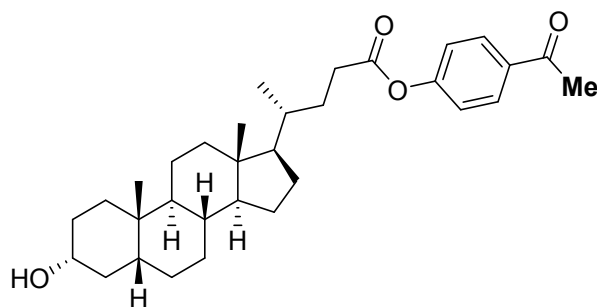

**(R)-4-Acetylphenyl 4-((3R,5R,8R,9S,10S,13R,14S,17R)-3-hydroxy-10,13-dimethylhexadecahydro-1H-cyclopenta[a]phenanthren-17-yl)pentanoate (6c):** Following *general procedure A*, **6c** was isolated as a white solid (99.2 mg, 78%), unknown compound;  $^1\text{H NMR}$  (400 MHz,  $\text{CDCl}_3$ ):  $\delta$  7.98 (dt,  $J = 8.4$  Hz, 2.0 Hz, 2 H), 7.17 (dt,  $J = 8.4$  Hz, 2.0 Hz, 2 H), 3.61 (m, 1 H), 2.66-2.43 (m, 2 H), 2.59 (s, 3 H), 1.98-1.74 (m, 7 H), 1.66-1.05 (m, 19 H), 0.97 (d,  $J = 6.4$  Hz, 3 H), 0.91 (s, 3 H), 0.65 ppm (s, 3 H);  $^{13}\text{C NMR}$  (100 MHz,  $\text{CDCl}_3$ ):  $\delta$  196.9, 172.2, 154.4, 134.5, 129.9, 121.7, 71.7, 56.4, 55.8, 42.7, 42.0, 40.3, 40.1, 36.3, 35.8, 35.29, 35.27, 34.5, 31.3, 30.8,

30.4, 28.2, 27.1, 26.6, 26.3, 24.1, 23.3, 20.7, 18.3, 12.0 ppm; HRMS (ESI) calcd. for  $C_{32}H_{47}O_4^+$   $[M + H]^+$   $m/z$  495.3468, found 495.3473. IR(KBr): 3397, 2940, 2854, 1789, 1654, 1463, 1421, 970, 775, 711, 603  $cm^{-1}$ ; Mp: 237.5-237.9 °C.

#### 4. Preliminary Mechanistic Studies

##### (1) CO<sub>2</sub> detection

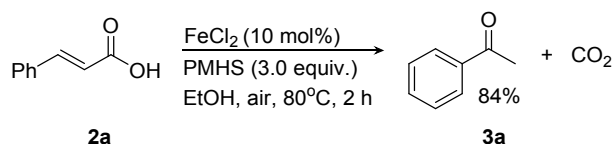

Following *general procedure A*, a 25mL flask was charge with FeCl<sub>2</sub> (0.025 mmol), **2a** (0.25 mmol), and PMHS (0.75 mmol) in EtOH (2.0 mL), and sealed with a rubber stopper. The reaction was stirred at 80 °C for 12 h. Head space sampling was taken from the reaction flask and analyzed by GC (gas chromatography) (Figure S1, black trace). The rest peak is identical to the GC of the CO<sub>2</sub> standard sample, indicating that CO<sub>2</sub> is generated in the reaction. [GC analysis was performed on an TDX-01(GC-7920 (Beijing Zhong Jiao Jin Yuan Technology Co., Ltd., Beijing, China), 1.5 m × 3 mm)] capillary column.

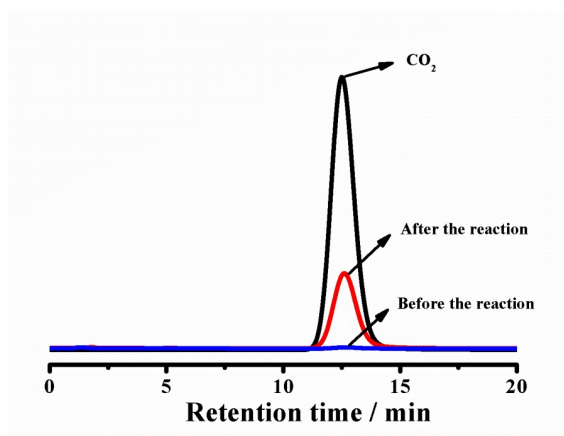

**Figure S1.** GC analysis of acetaldehyde in the reaction mixture

##### (2) Alkene intermediate detection

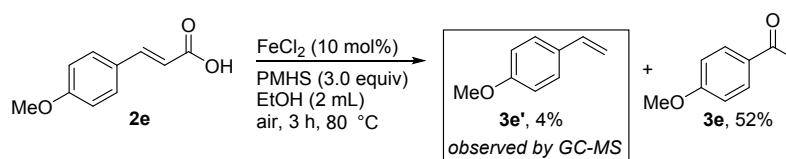

Following *general procedure A*, a 25mL flask was charge with FeCl<sub>2</sub> (0.025 mmol), **2e** (0.25 mmol), and PMHS (0.75 mmol) in EtOH (2.0 mL), and sealed with a rubber stopper. The reaction

was stirred at 80 °C for 3 h. Then, the resulting reaction mixture was analyzed by GC-MS (gas chromatography-mass spectrometer) (Figure S2). Minor 4-methoxystyrene was observed and its mass spectra [M: 134] is consistent with a previous report.<sup>[S15]</sup>

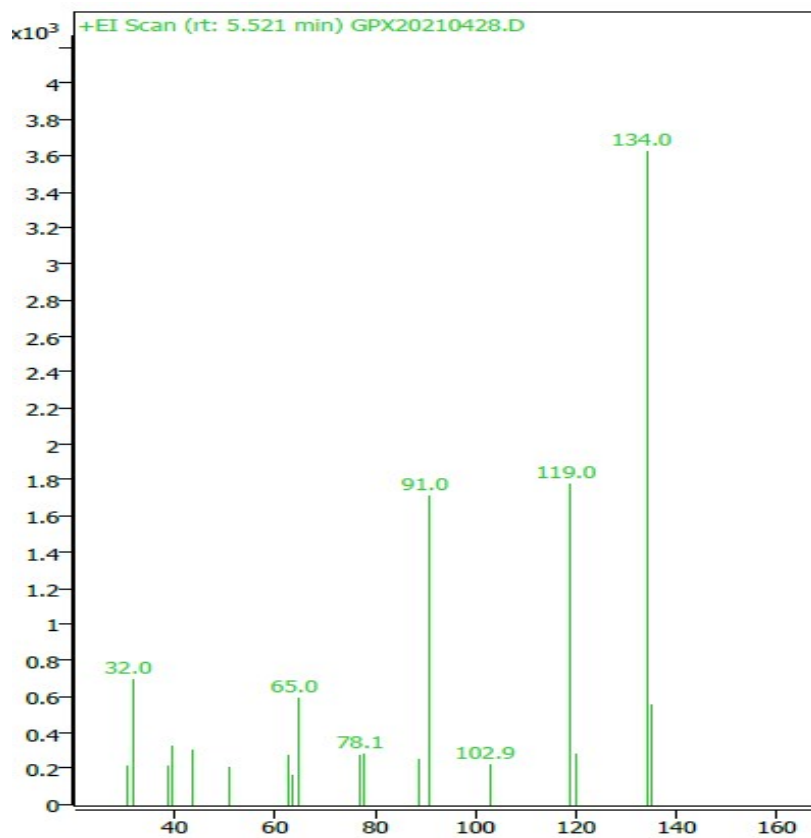

**Figure S2.** GC-MS analysis of 4-methoxystyrene in the reaction mixture

---

## 5. References

- [S1]. S. Xu, Z. Yun, Y. Feng, T. Tang, Z. Fang and T. Tang, *RSC Adv.*, 2016, **6**, 69822-69827.
- [S2]. X. Wang, C. Wang, Y. Liu and J. Xiao, *Green Chem.*, 2016, **18**, 4605-4610.
- [S3]. S. S. Poly, S.M.A. H. Siddiki, A. S. Touchy, S. Yasumura, T. Toyao. Z. Maeno and K. Shimizu, *J. Catal.*, 2018, **368**, 145-154.
- [S4] T. H. Sum, T. J. Sum, W. R. J. D. Galloway, S. Collins, D. G. Twigg, F. Hollfelder and D. R. Spring, *Molecules*, 2016, **21**, 1230.
- [S5]. G. Zhang, J. Lei, X. Han, Y. Luan, C. Ding and S. Shan, *Synlett*, 2015, **26**, 779-784.
- [S6]. Y. Mao, Y. Liu, Y. Hu, L. Wang, S. Zhang and W. Wang, *ACS Catal.*, 2018, **8**, 3016-3020.
- [S7]. G. Oss, J. Ho and T. V. Nguyen. *Eur. J. Org. Chem.*, 2018, 3974-3981.
- [S8]. J. Tian, C. Yi, Z. He, M. Yao and D. Sang, *ChemistrySelect*, 2017, **2**, 9211-9214.
- [S9]. M. Zhou, C. Ni, Z. He and J. Hu, *Org. Lett.*, 2016, **18**, 3754-3757.
- [S10]. M. Meng, L. Yang, K. Cheng and C. Qi. *J. Org. Chem.*, 2018, **83**, 3275-3284.
- [S11]. B. Liu, F. Jin, T. Wang, X. Yuan, and W. Han, *Angew. Chem. Int. Ed.*, 2017, **56**, 12712-12717.
- [S12]. M. K. Gangwar, P. Dahiya, B. Emayavaramban and B. Sundararaju, *Chem.-Asian J.*, 2018, **13**, 2445-2448.
- [S13] E. Hasegawa, T. Tanaka, N. Izumiya, T. Kiuchi, Y. Ooe, H. Iwamoto, S. Takizawa and S. Murata, *J. Org. Chem.*, 2020, **85**, 4344-4353.
- [S14] V. Beejmohun, E. Grand, D. Lesur, F. Mesnard, M.-A. Fliniaux and J. Kovensky, *J. Labelled. Compd. Rad.*, 2006, **49**, 463-470.
- [S15] A. Emilio and N. Carmen, *Adv. Synth. Catal.*, 2006, **348**, 2085-2091.



## 6. Copies of NMR Spectra

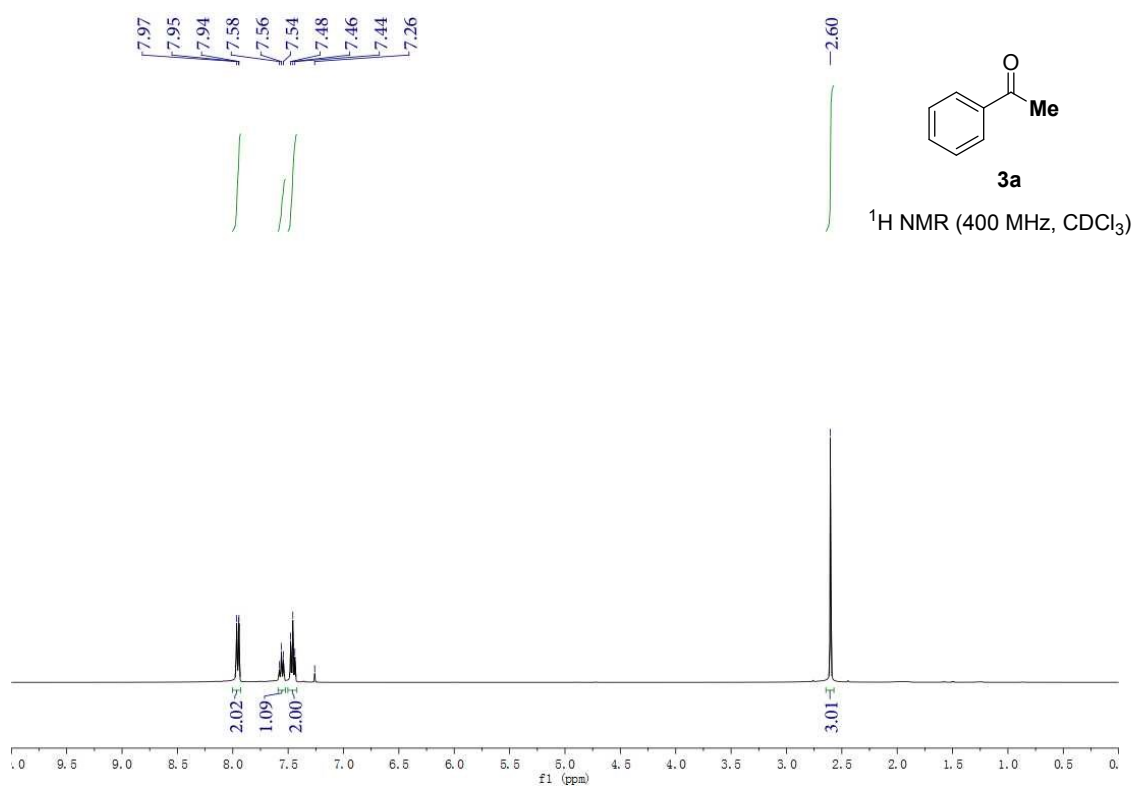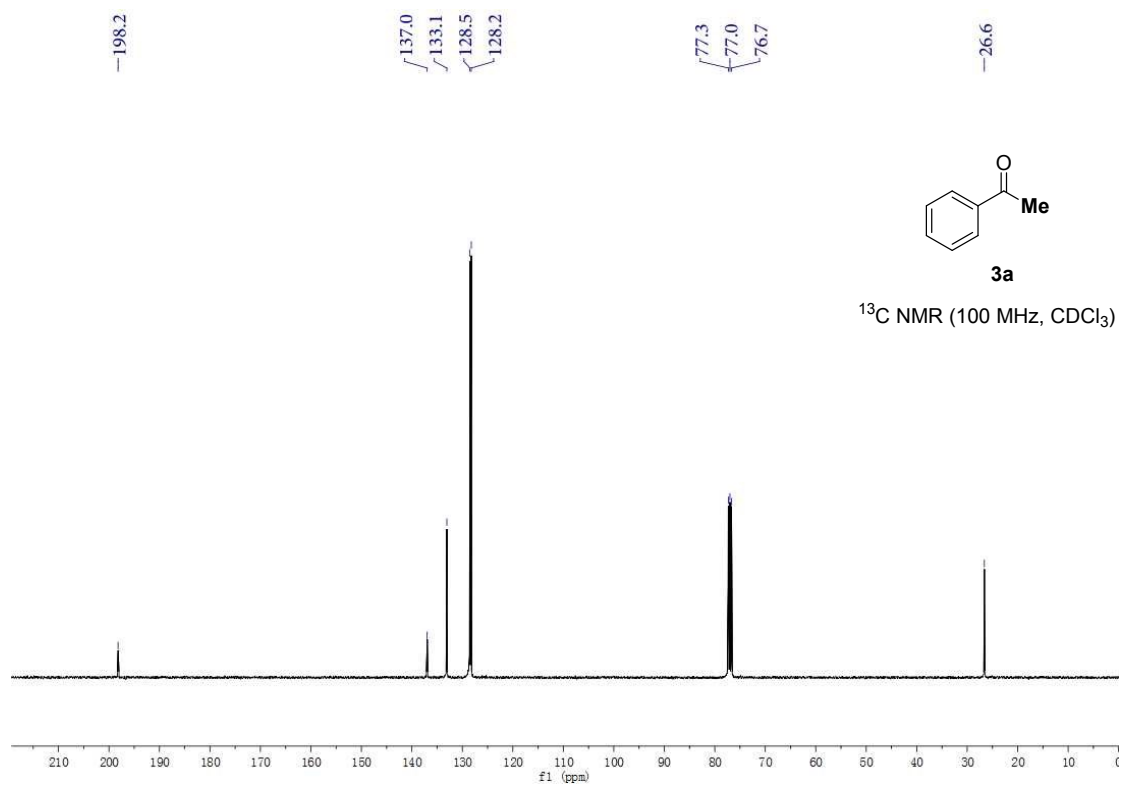

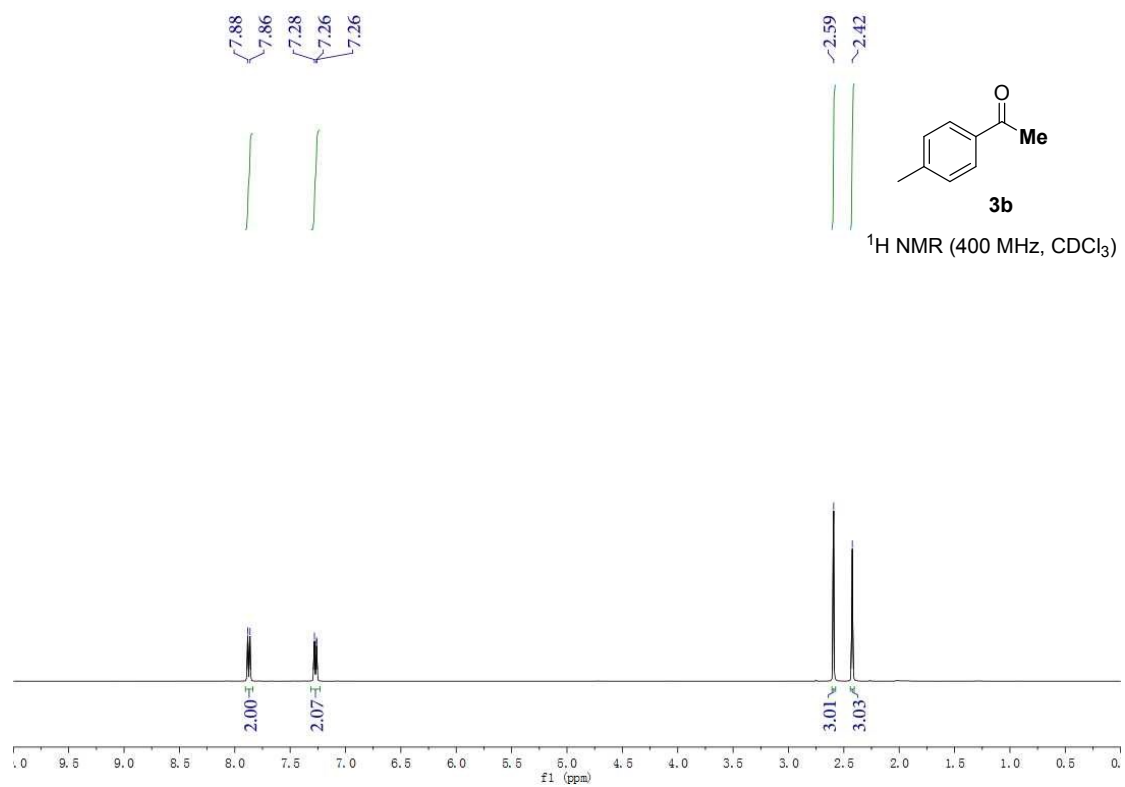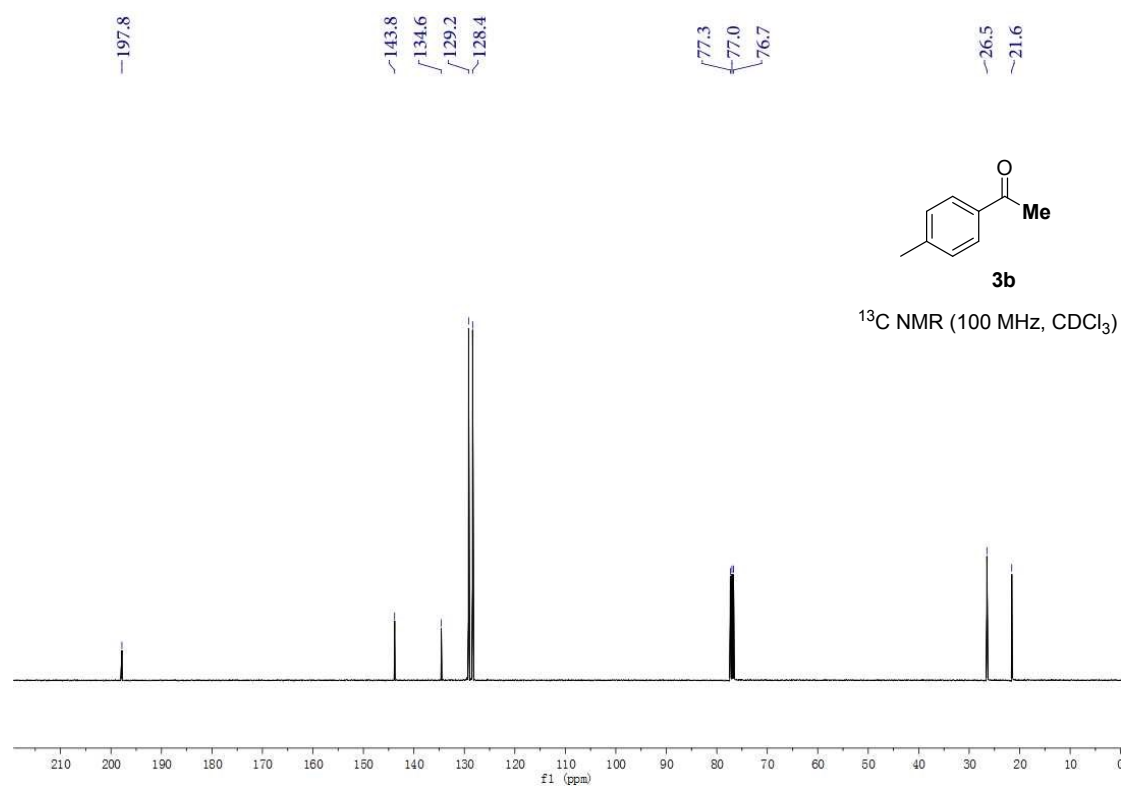

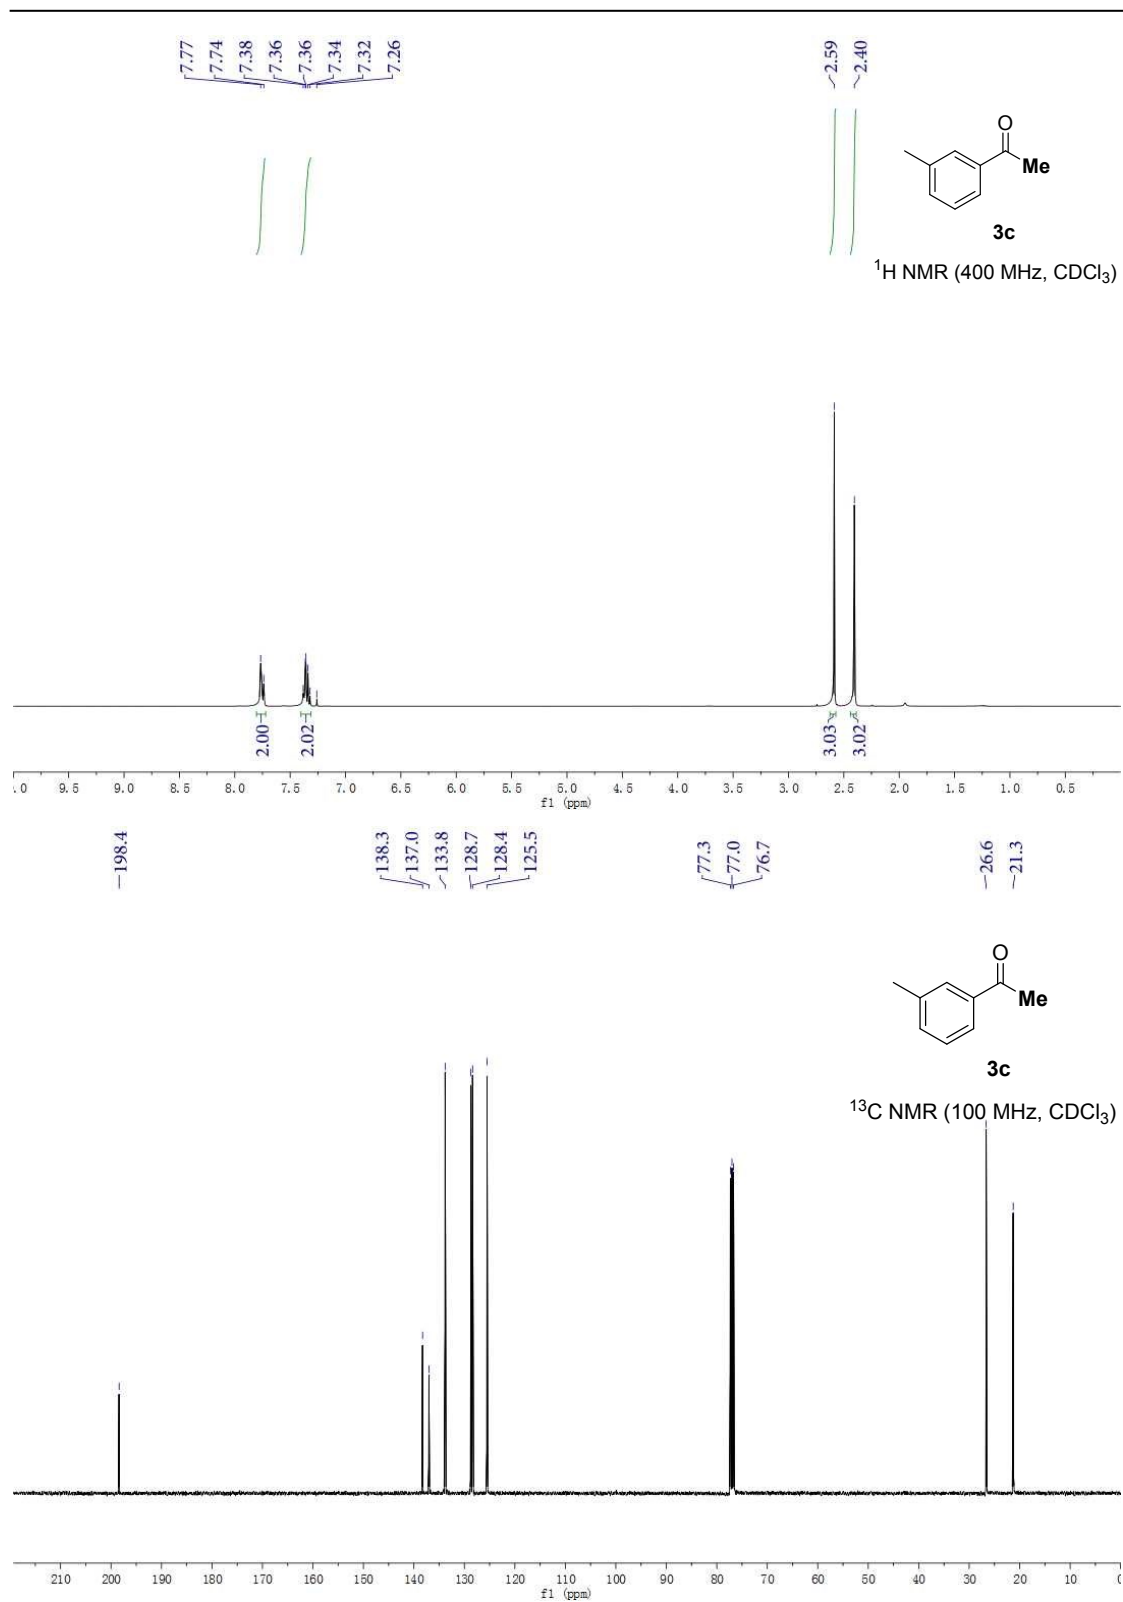

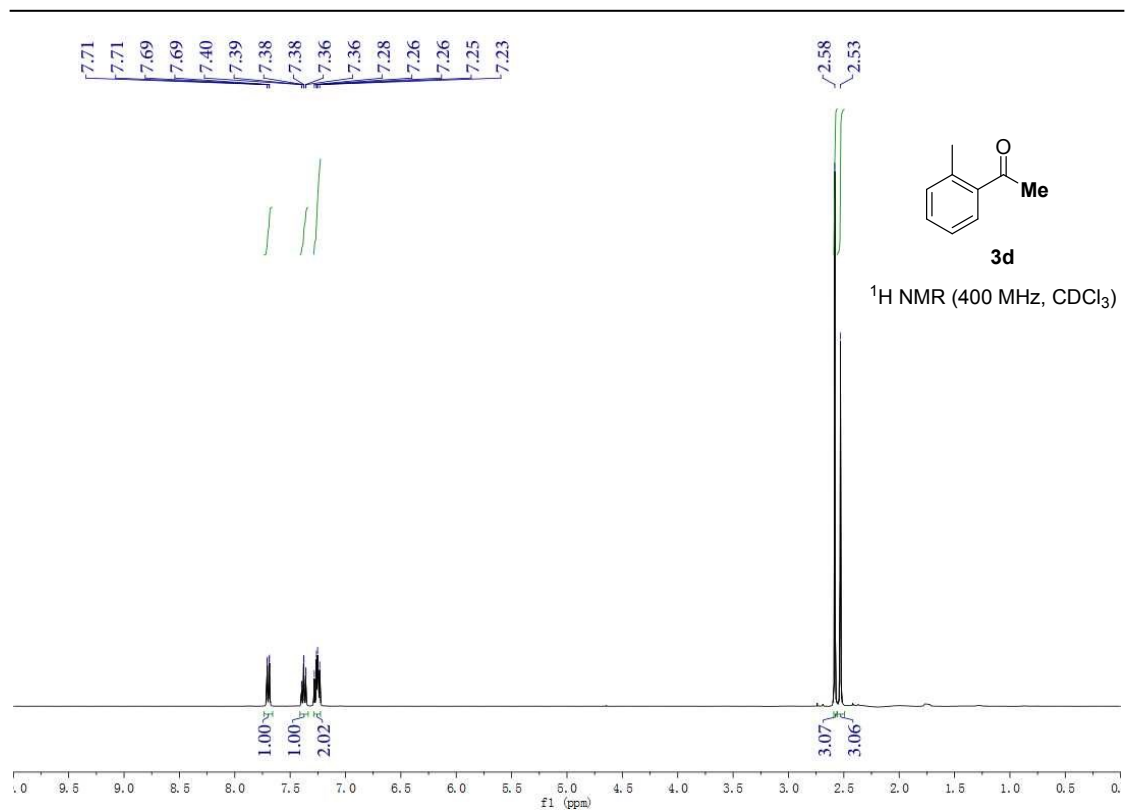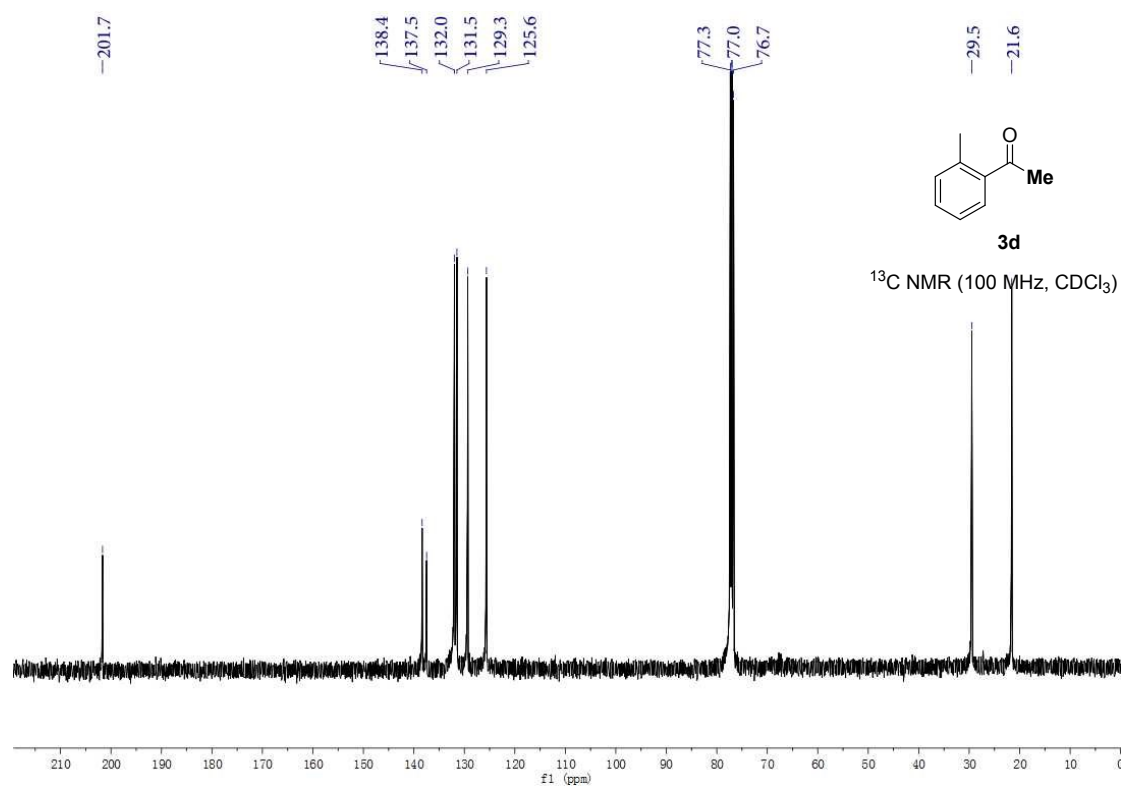

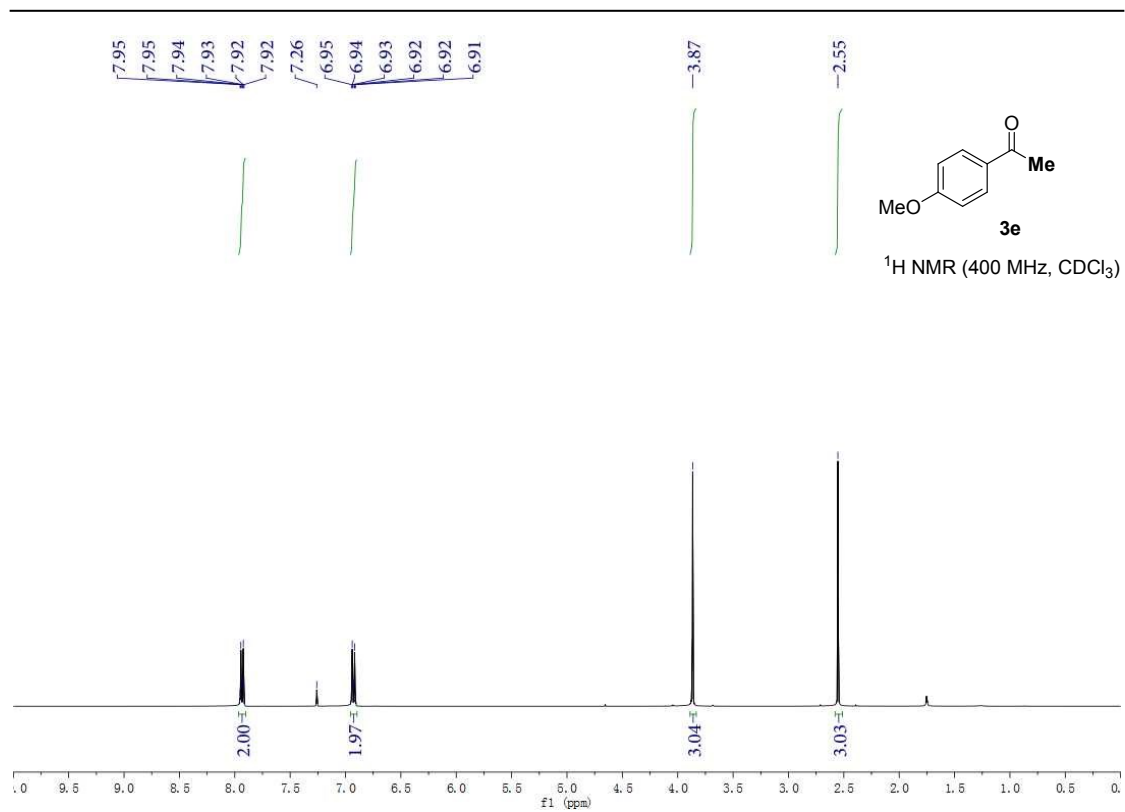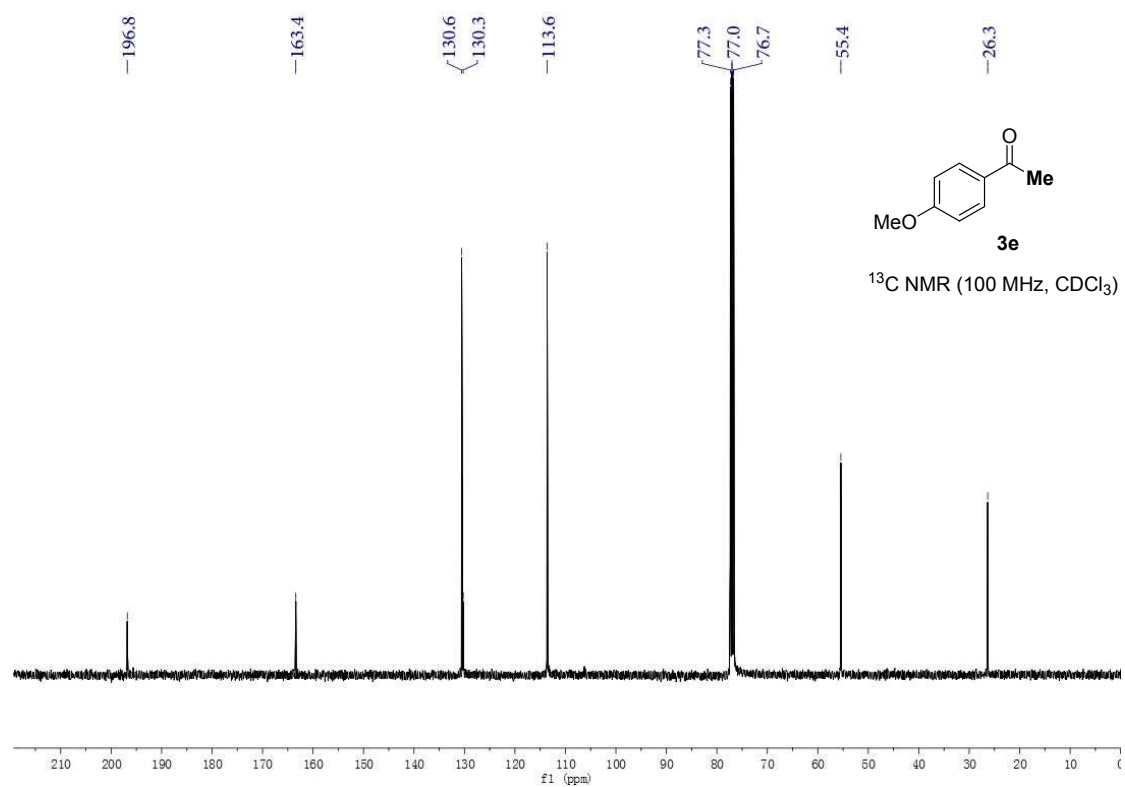

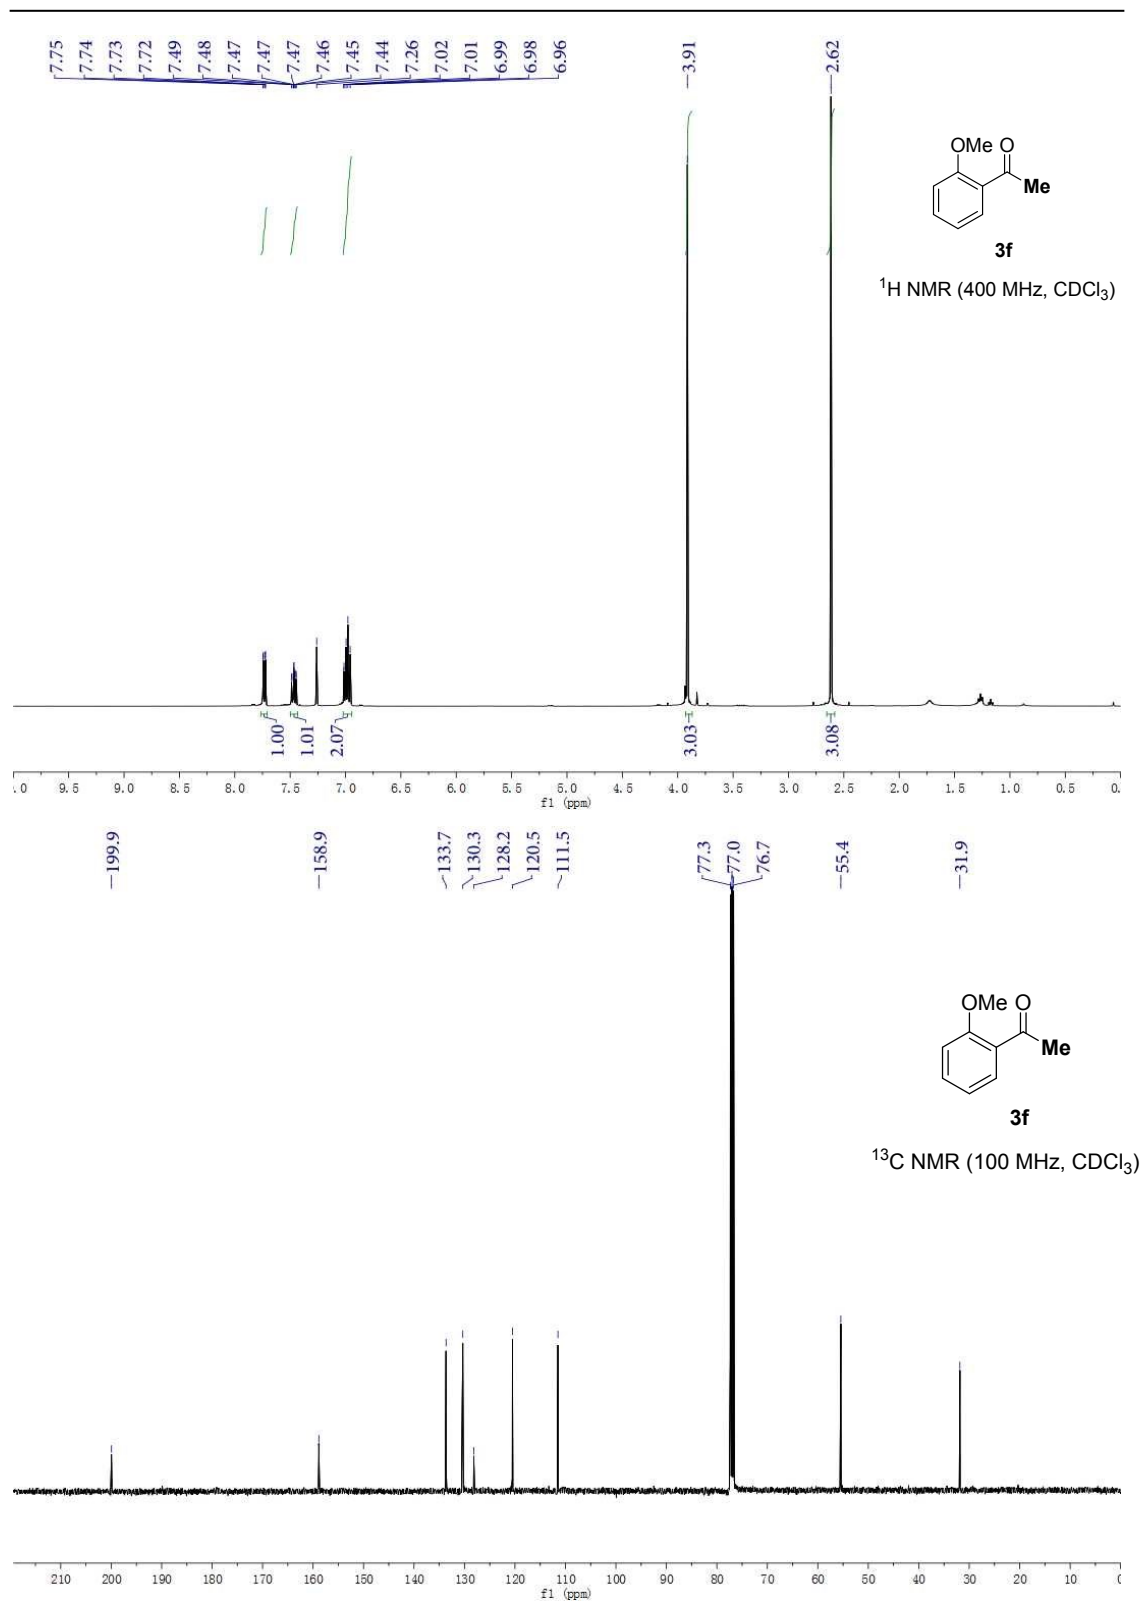

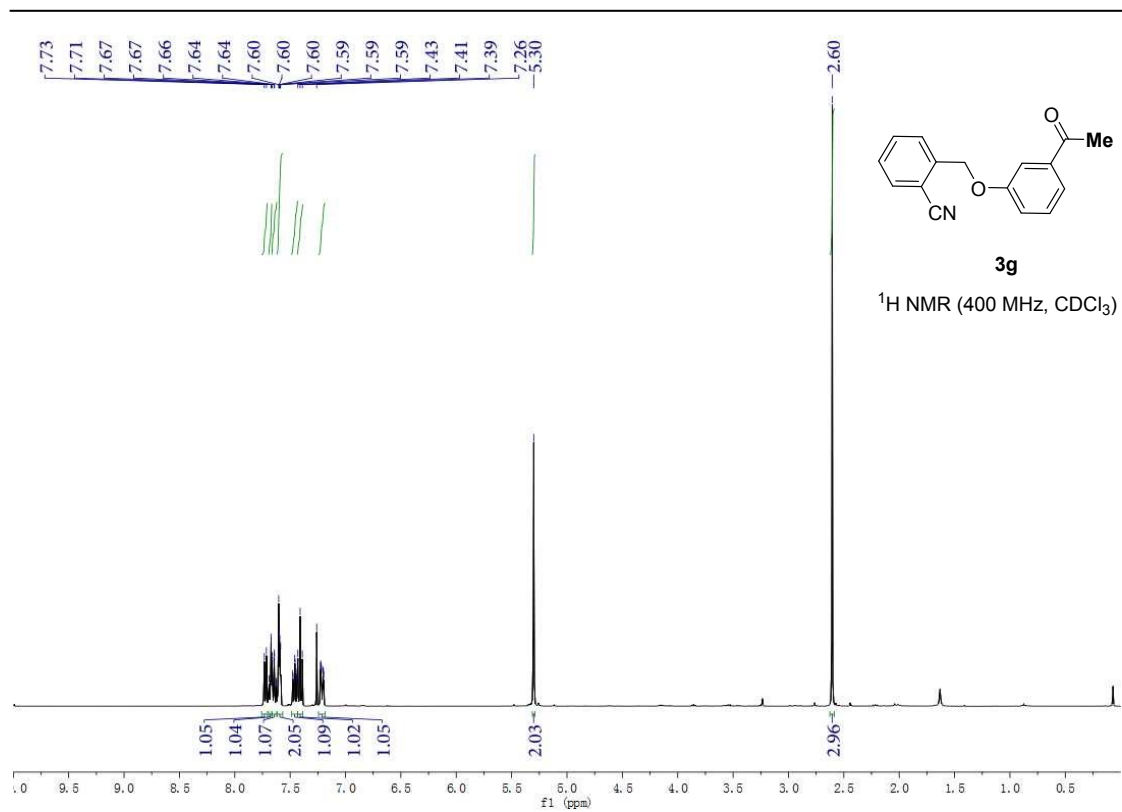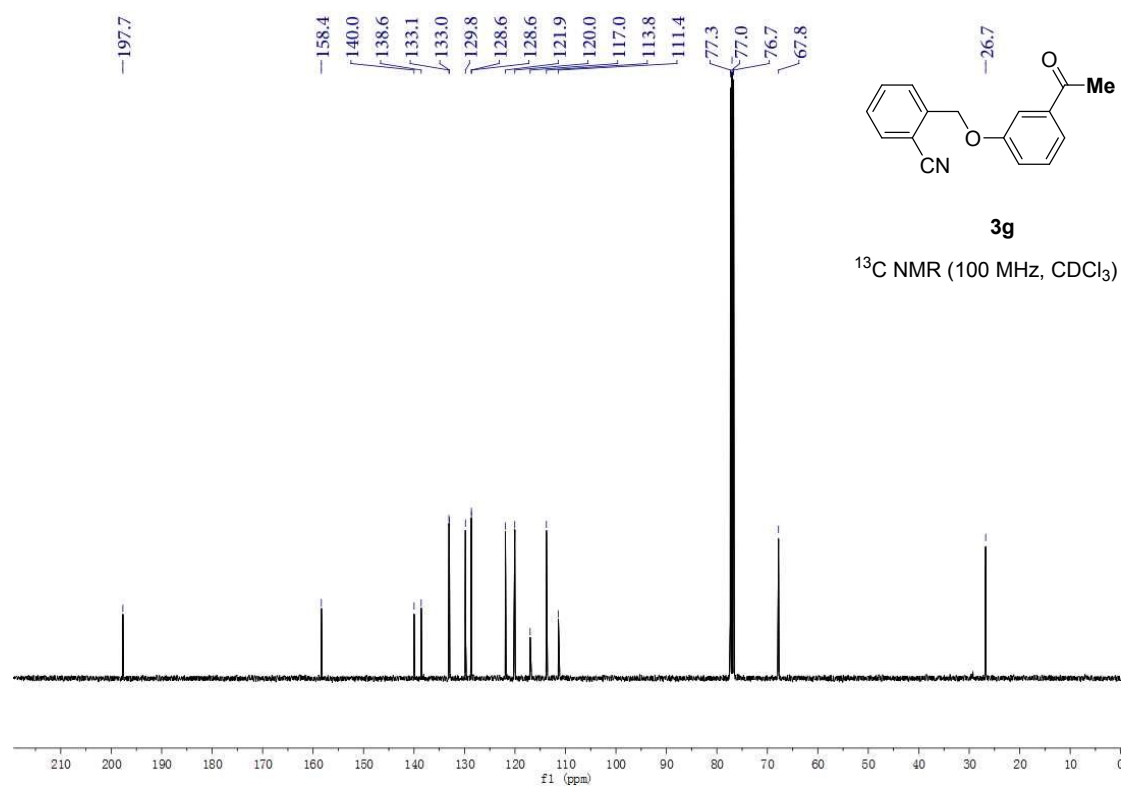

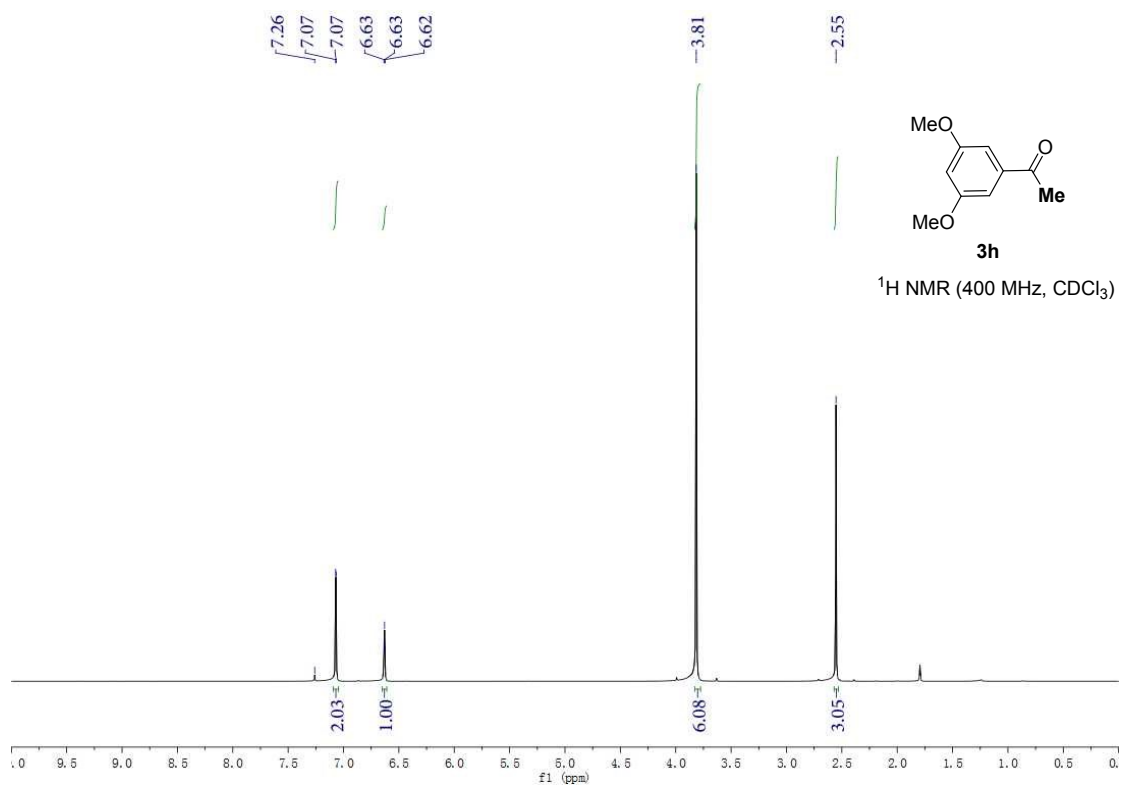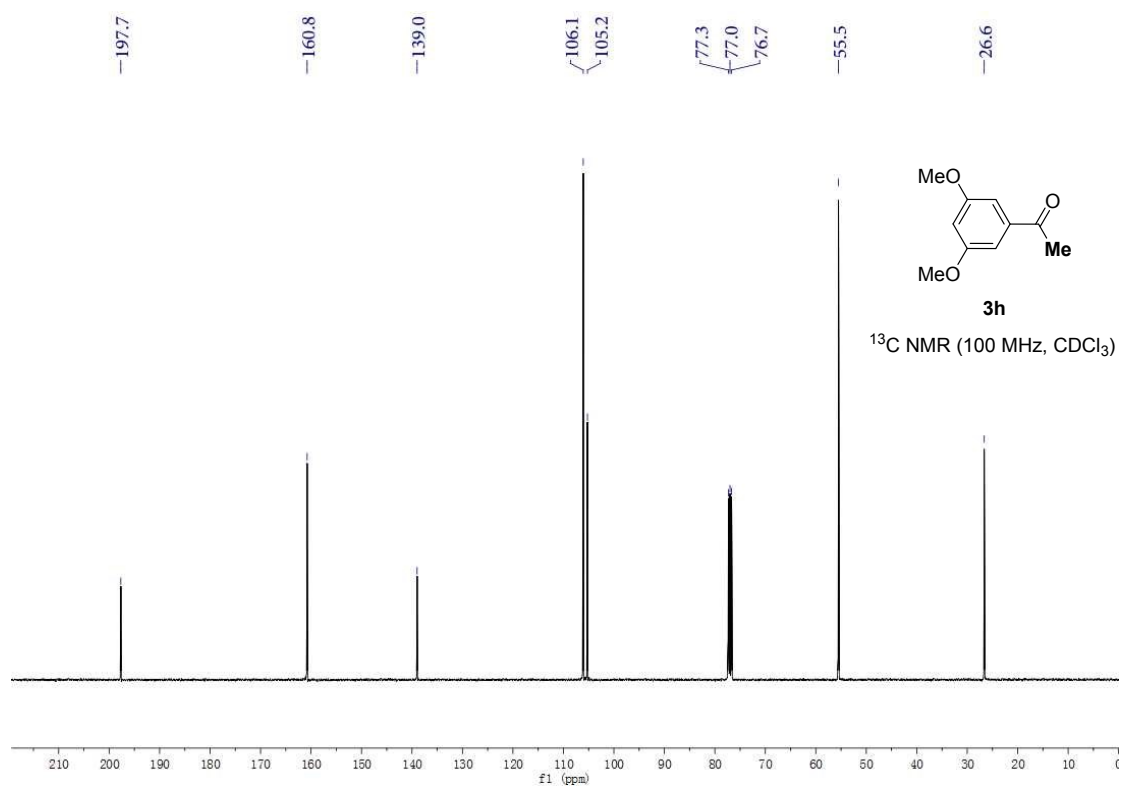



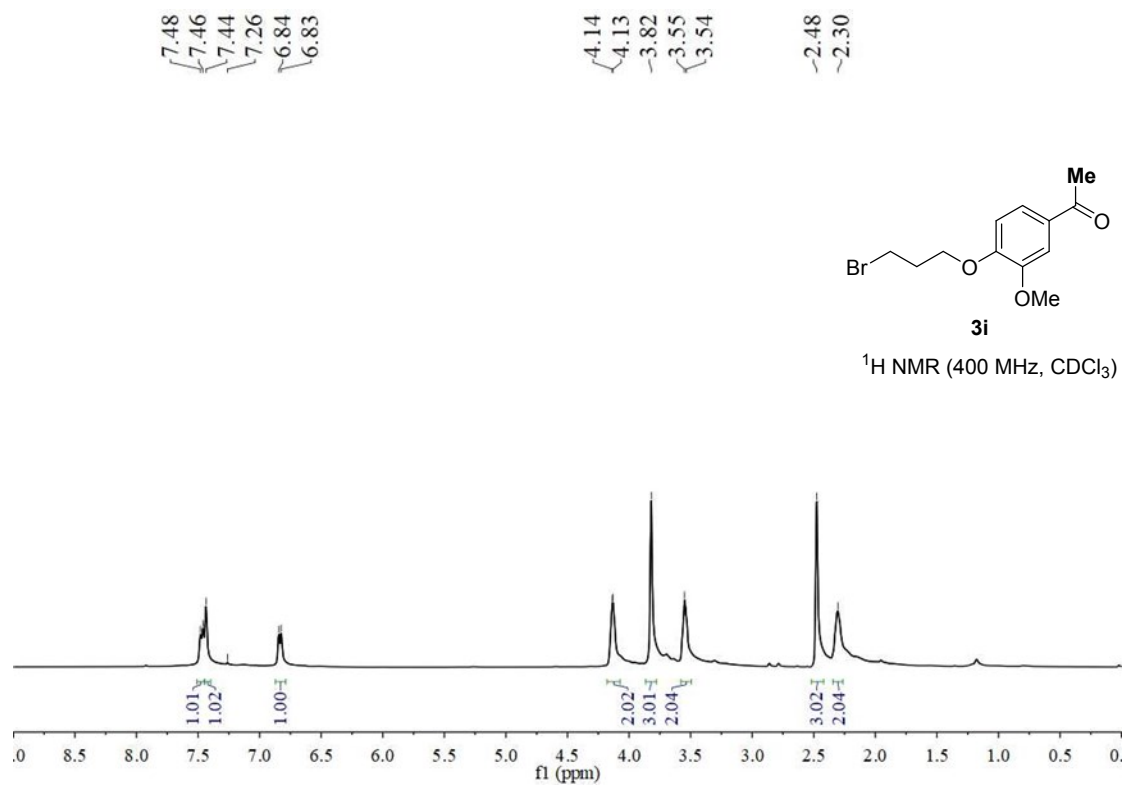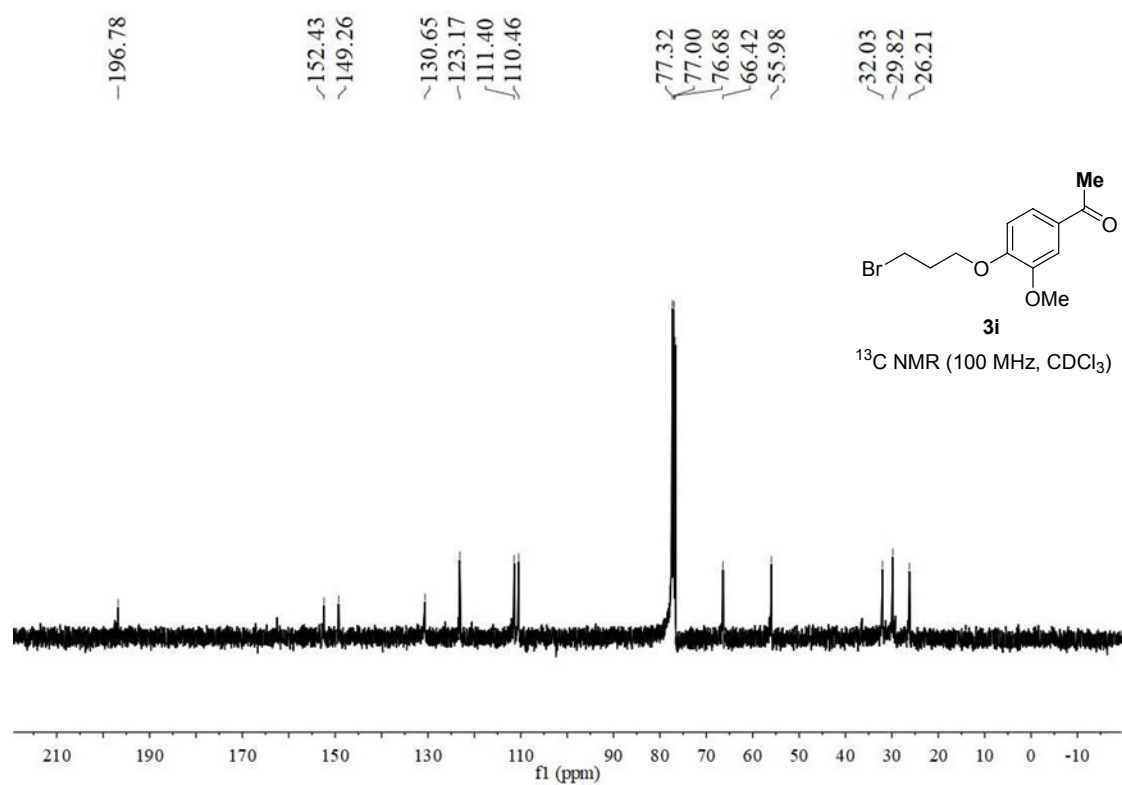

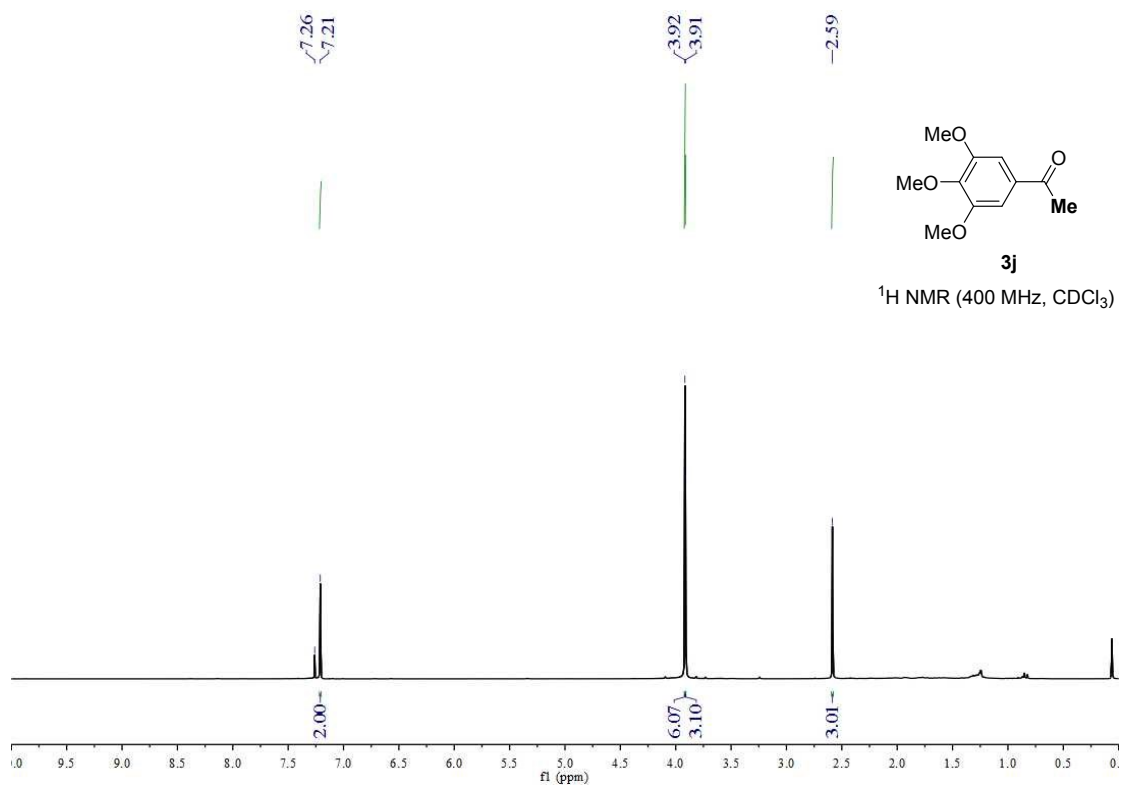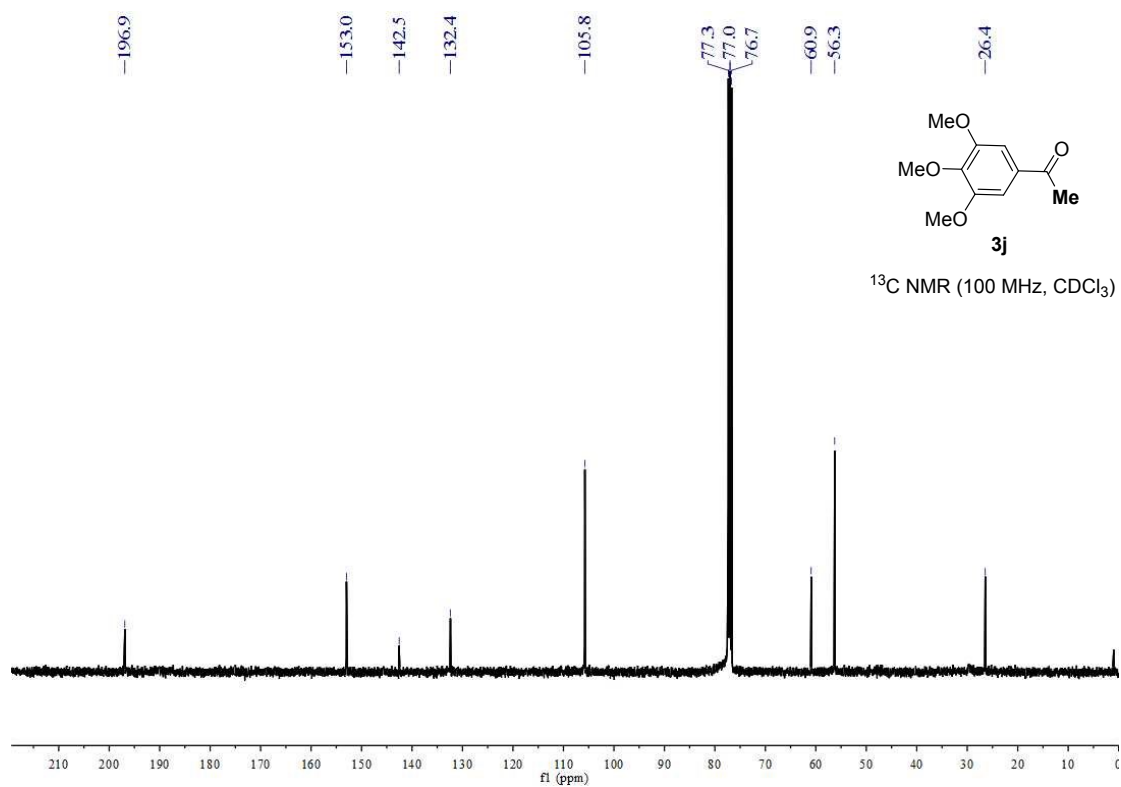

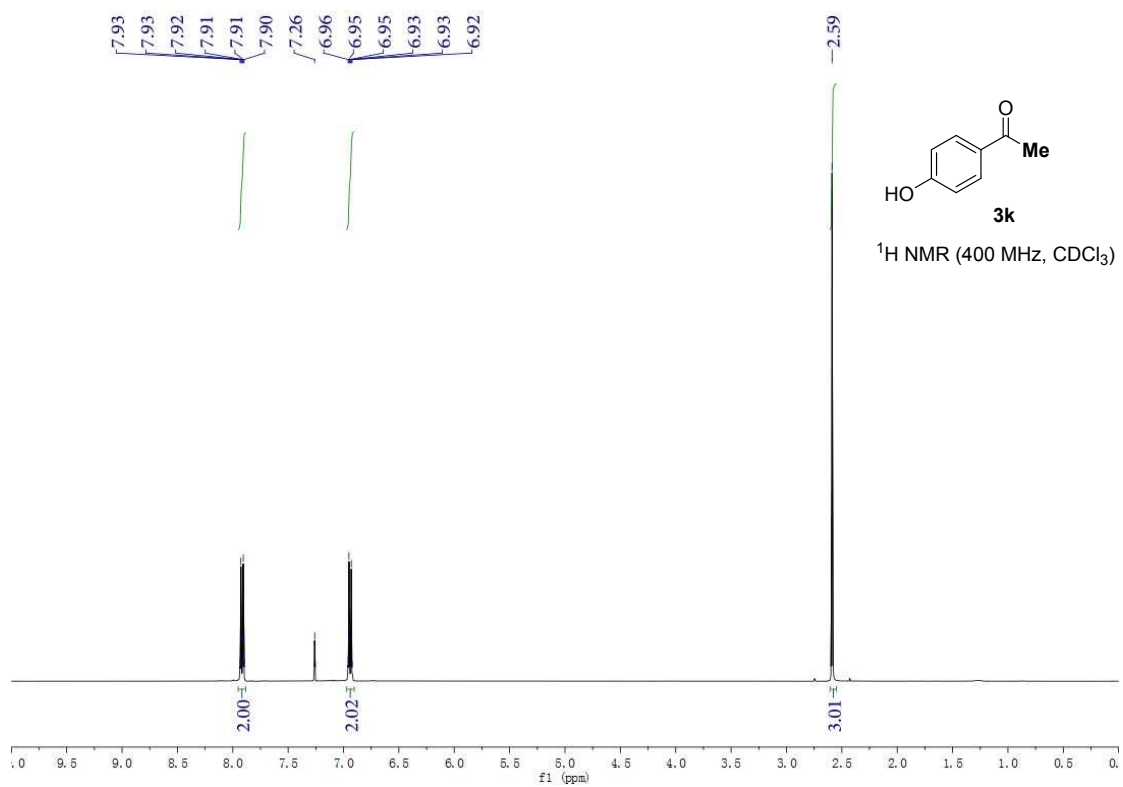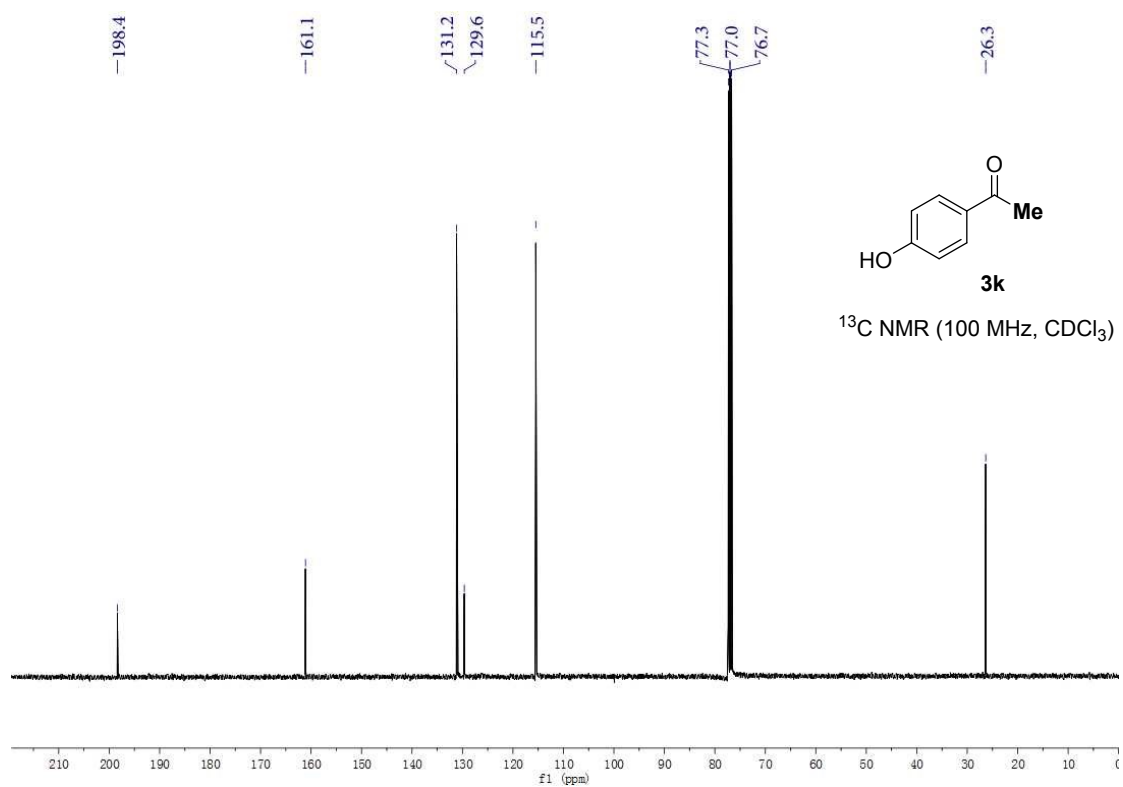

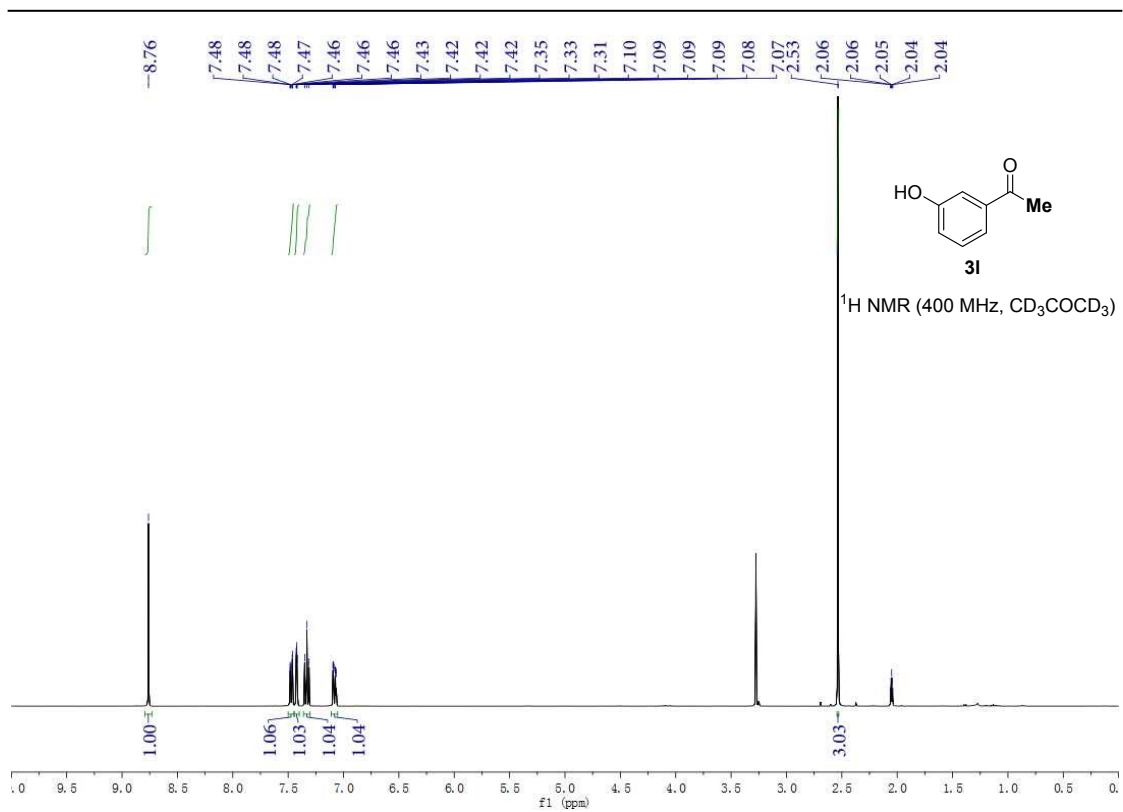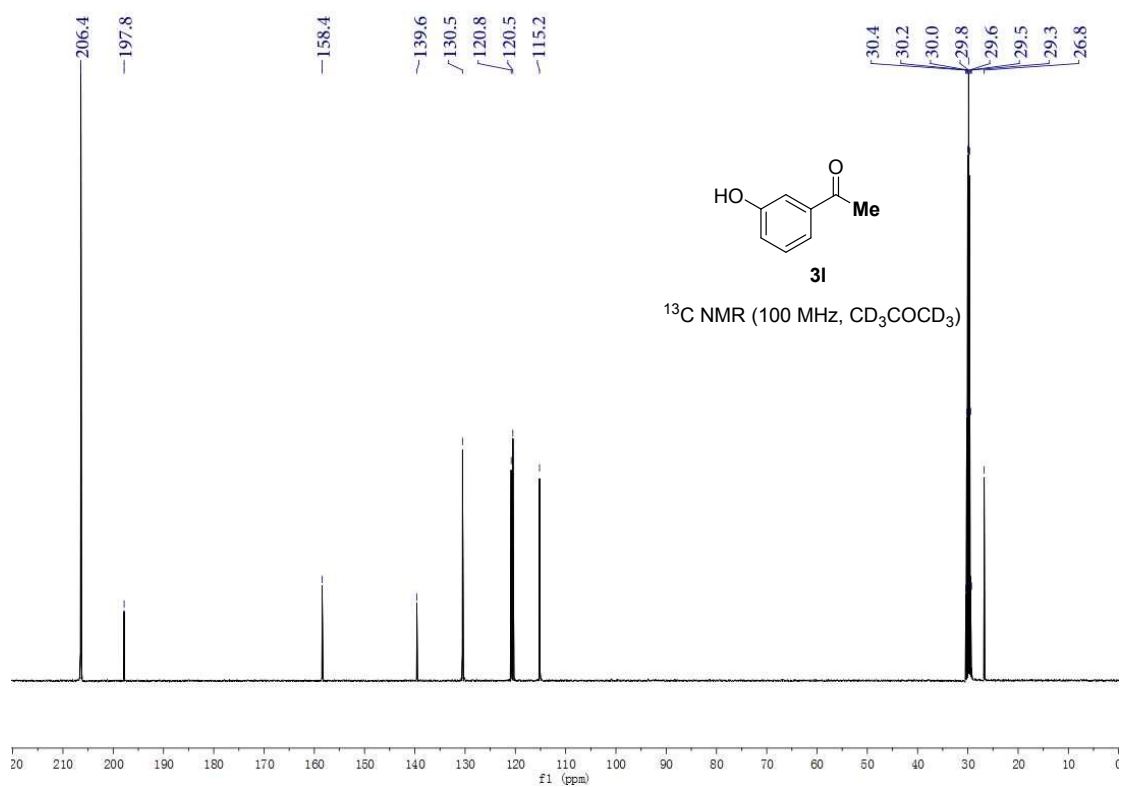

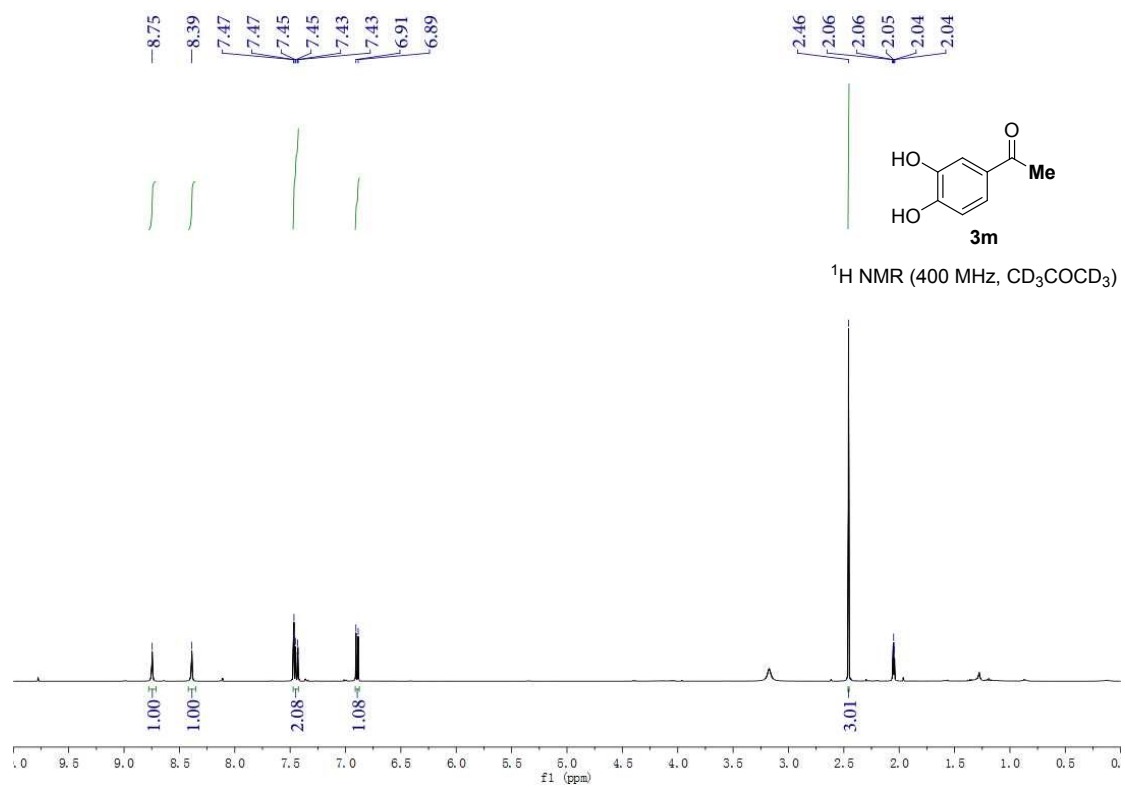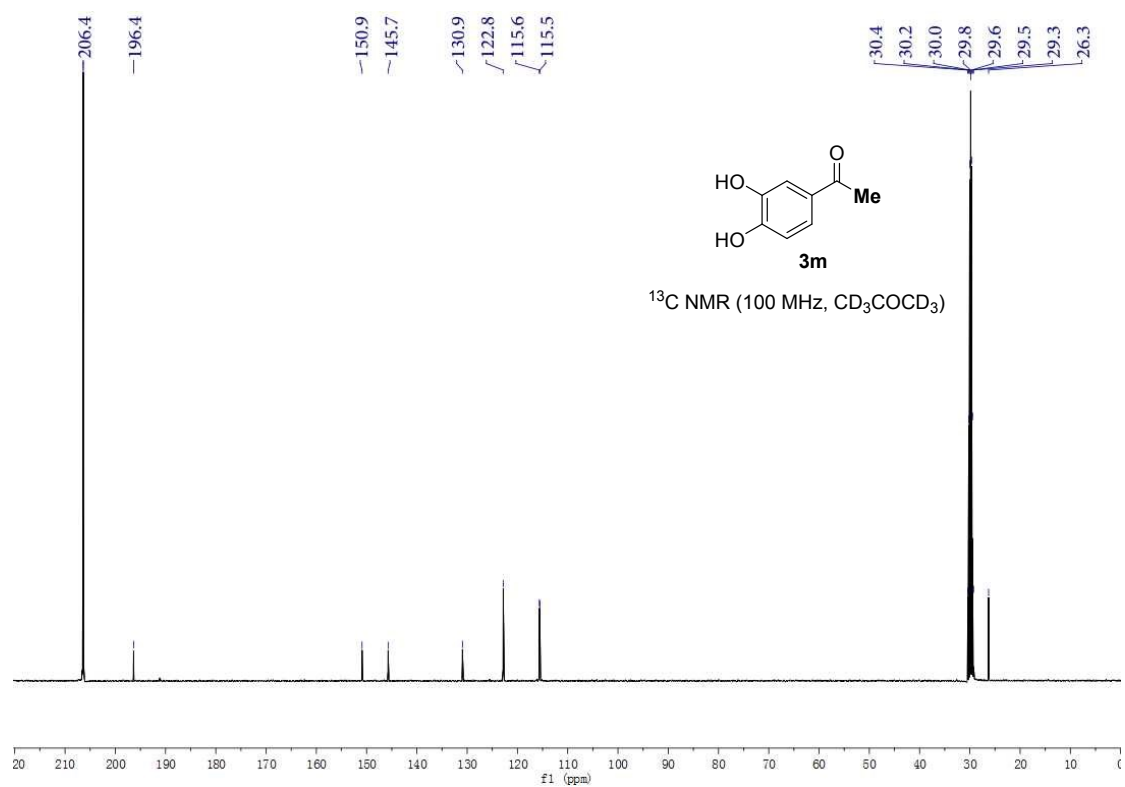

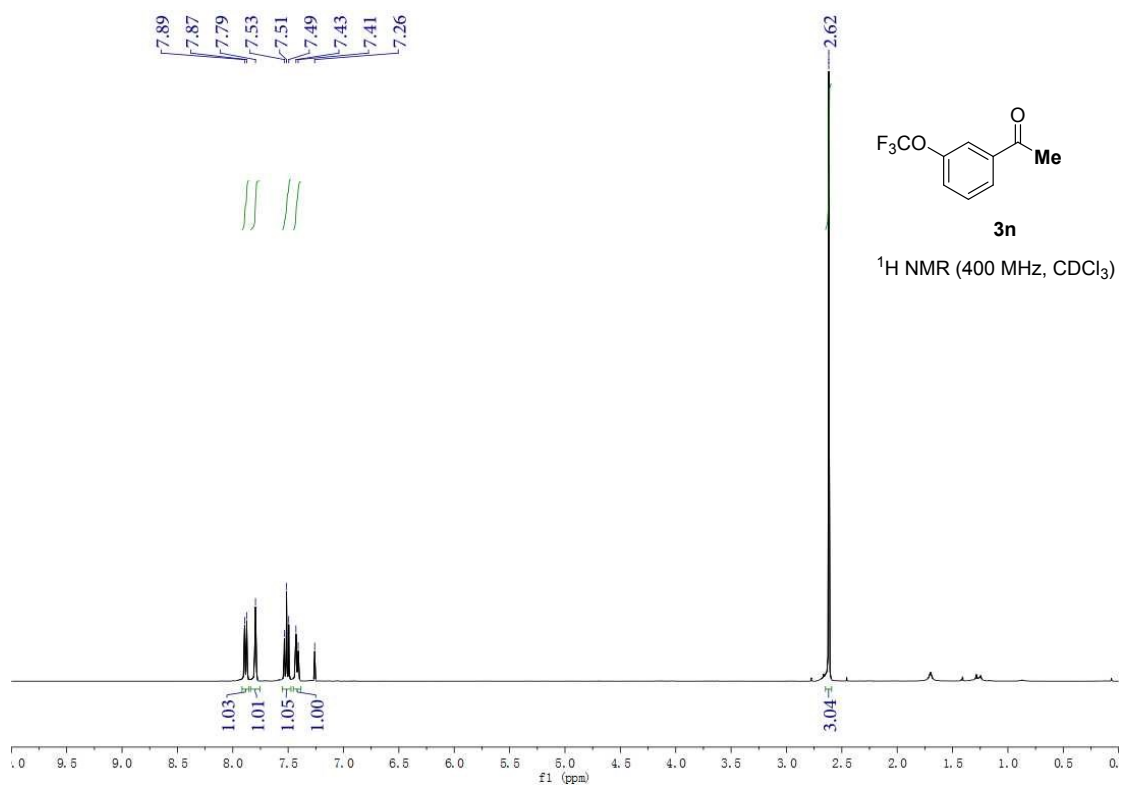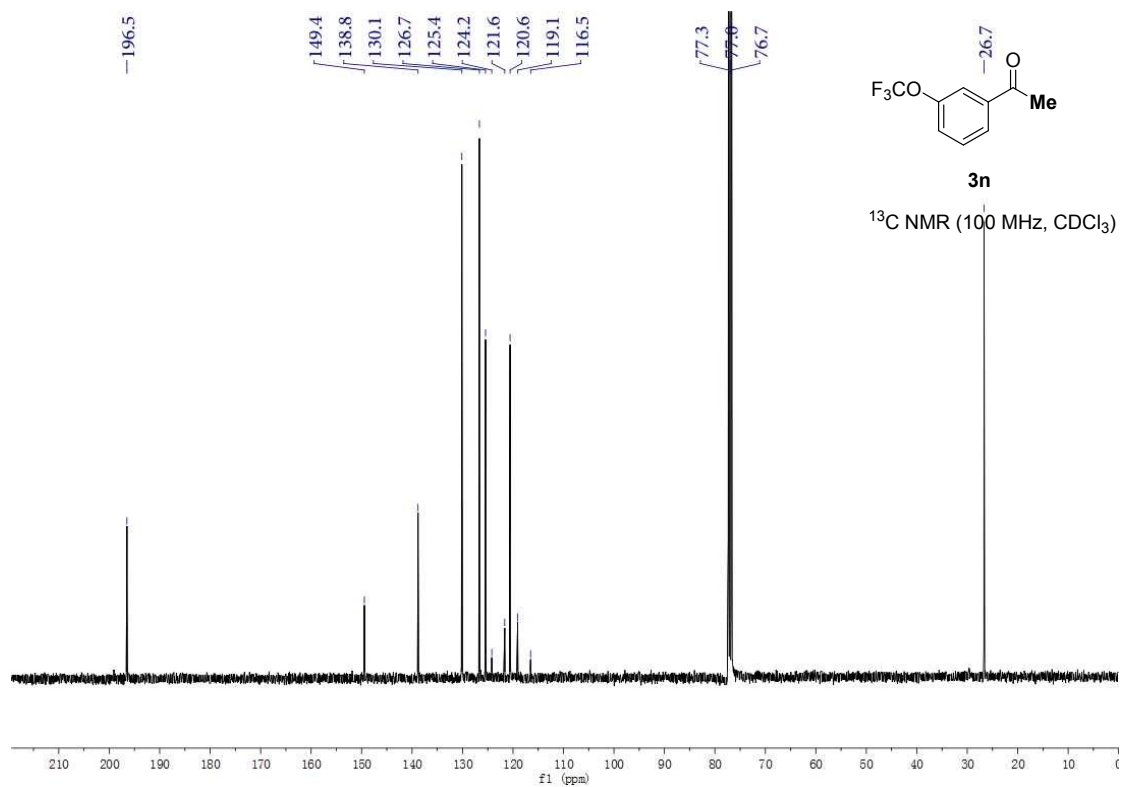

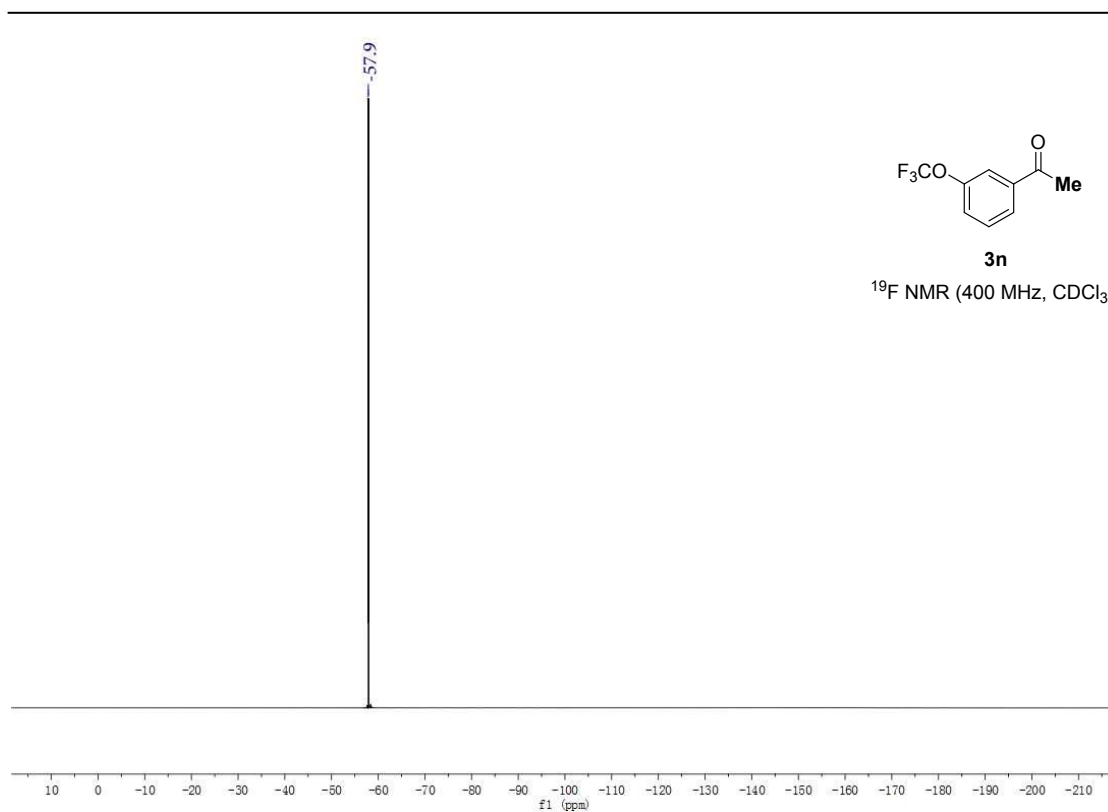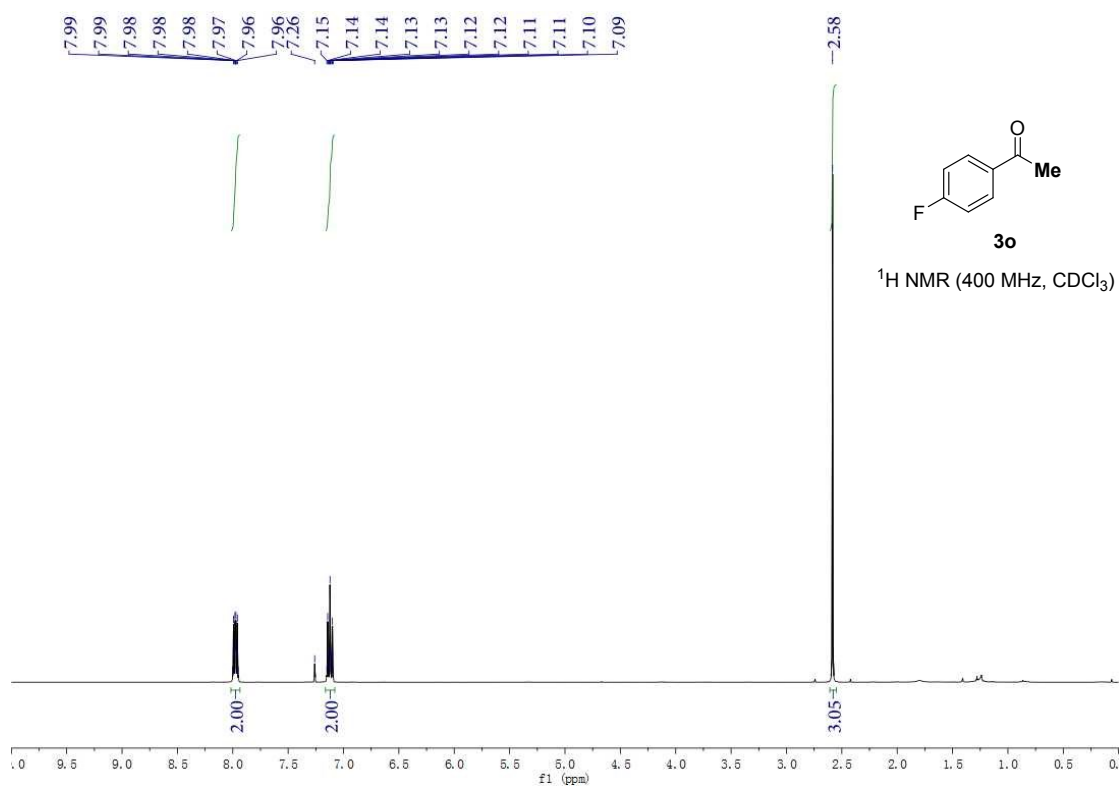

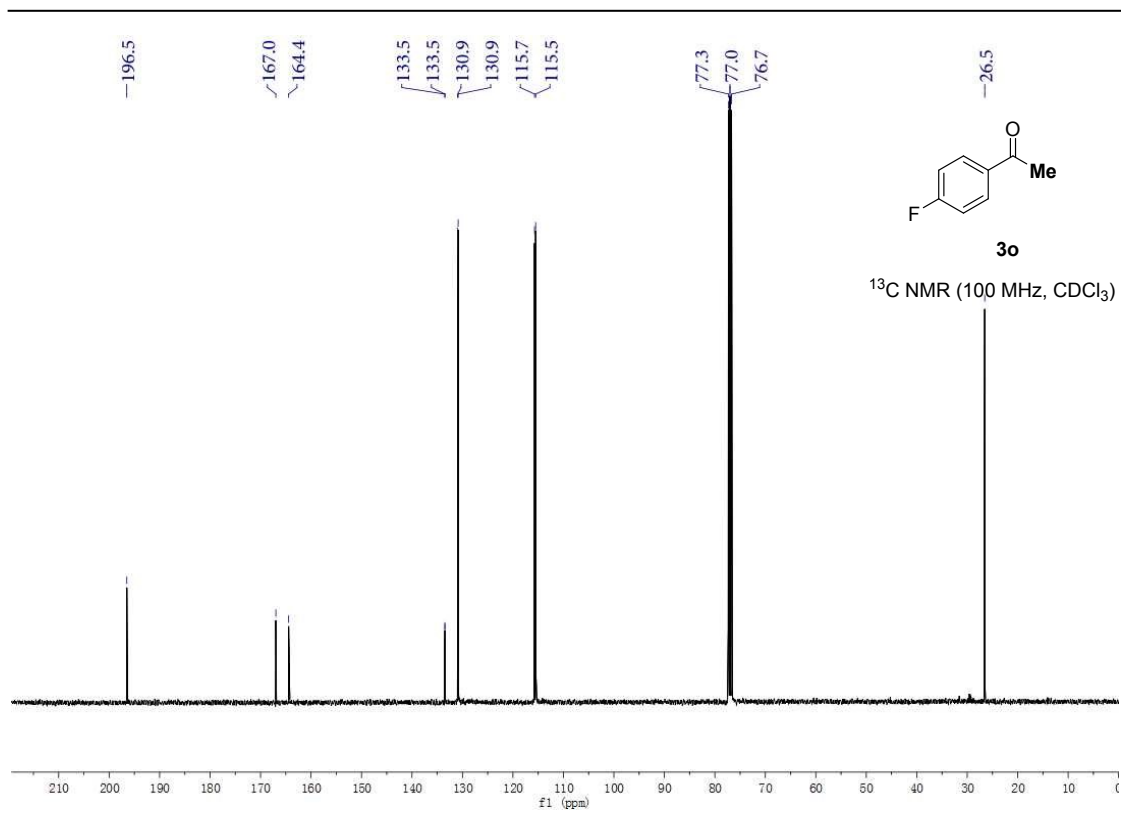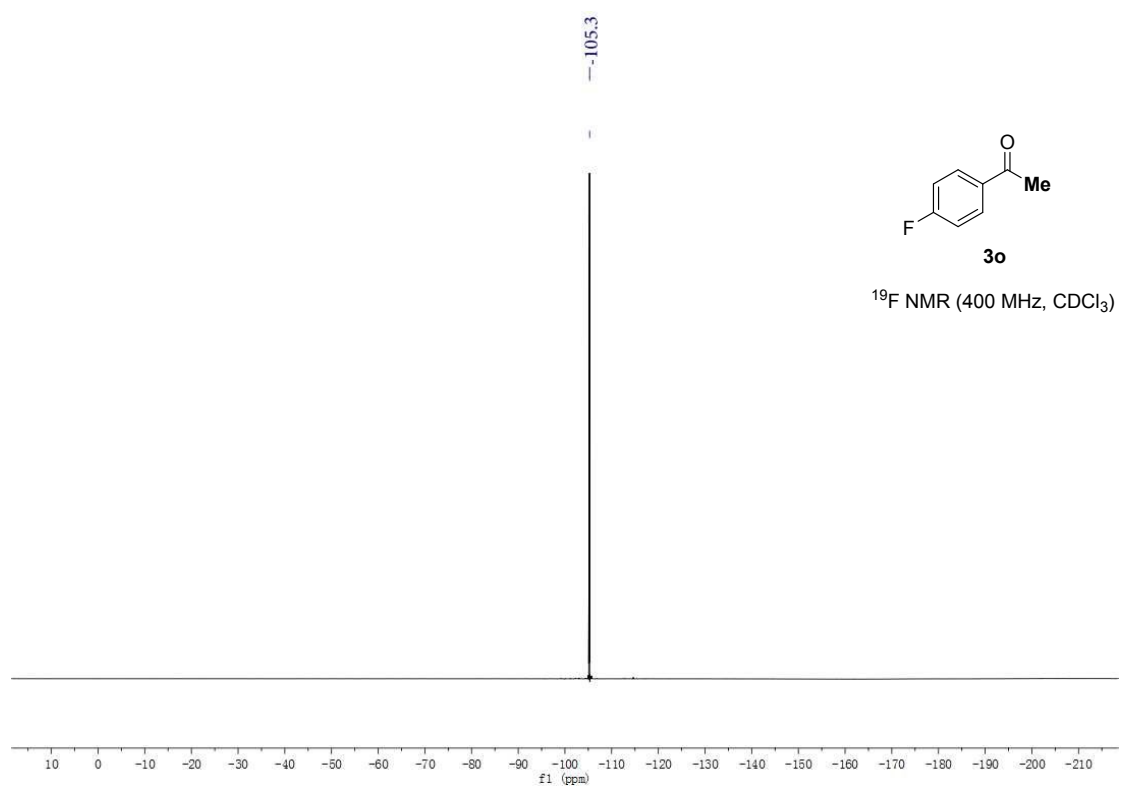



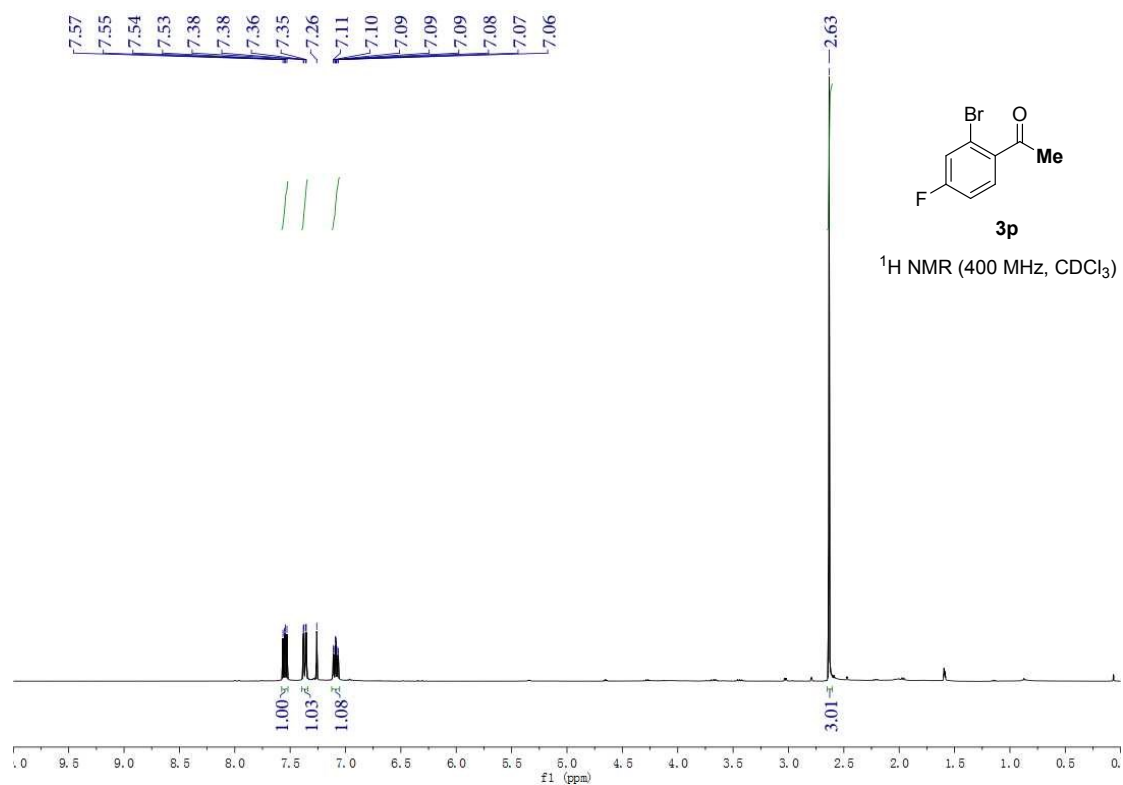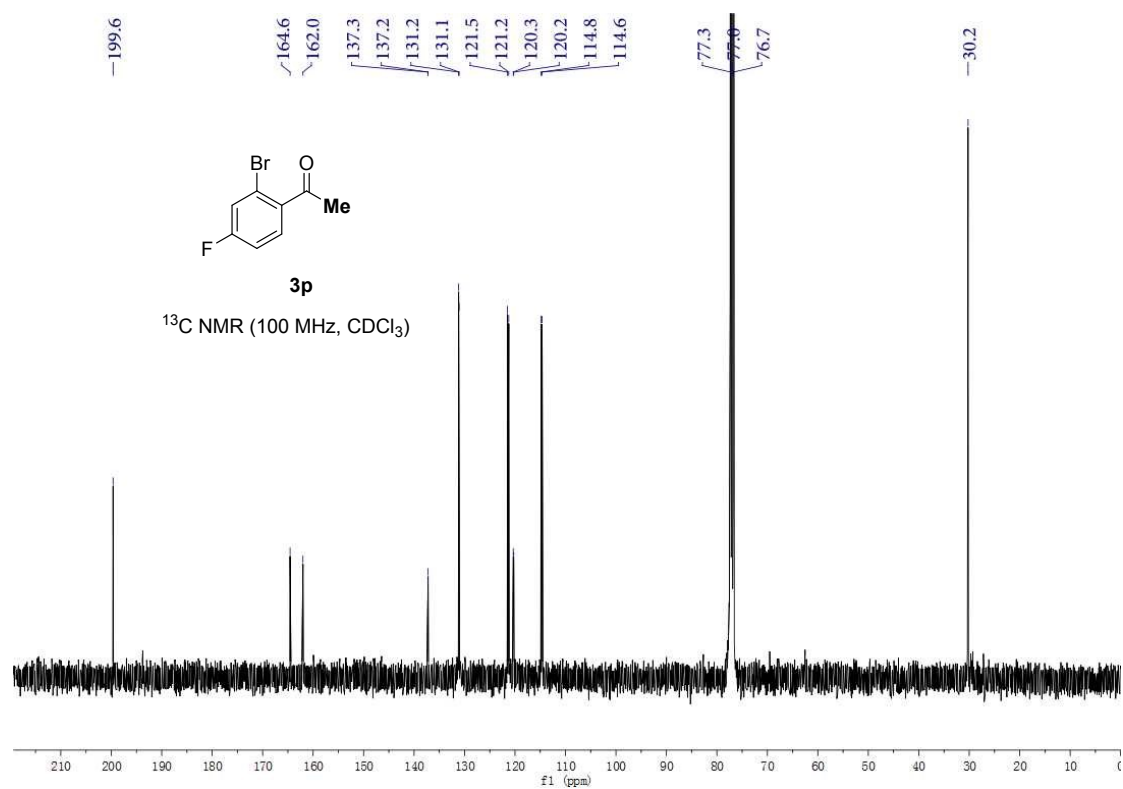

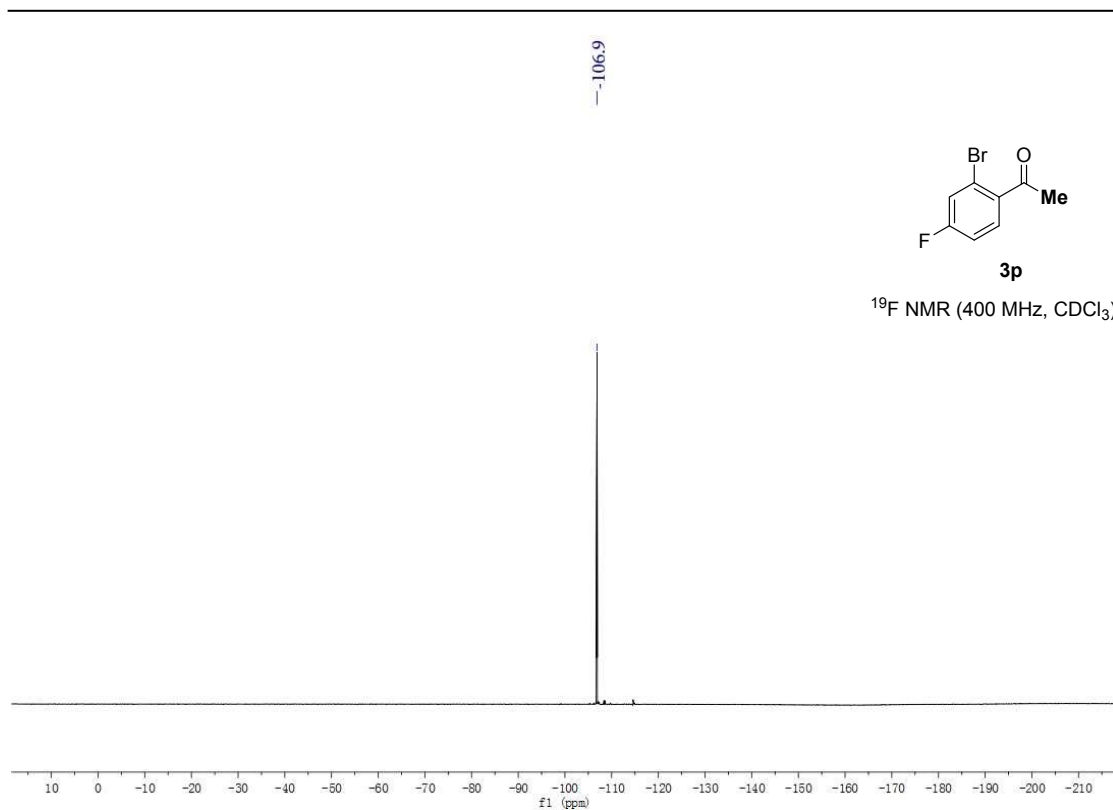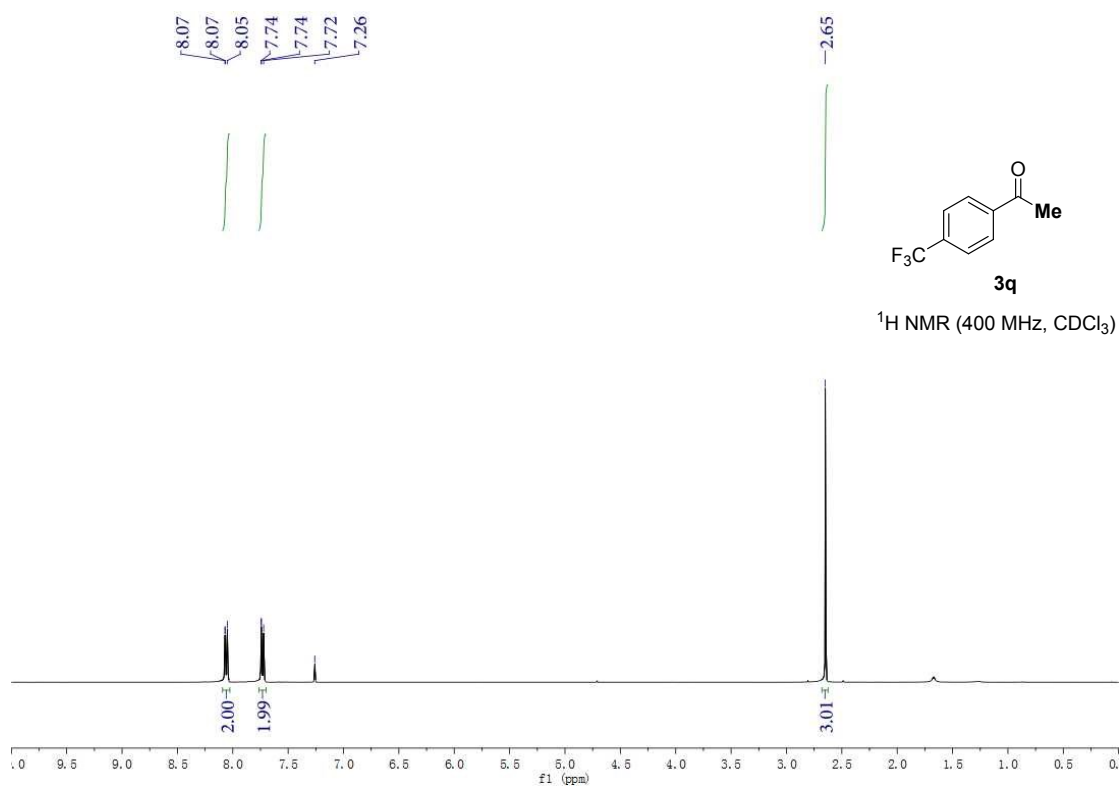

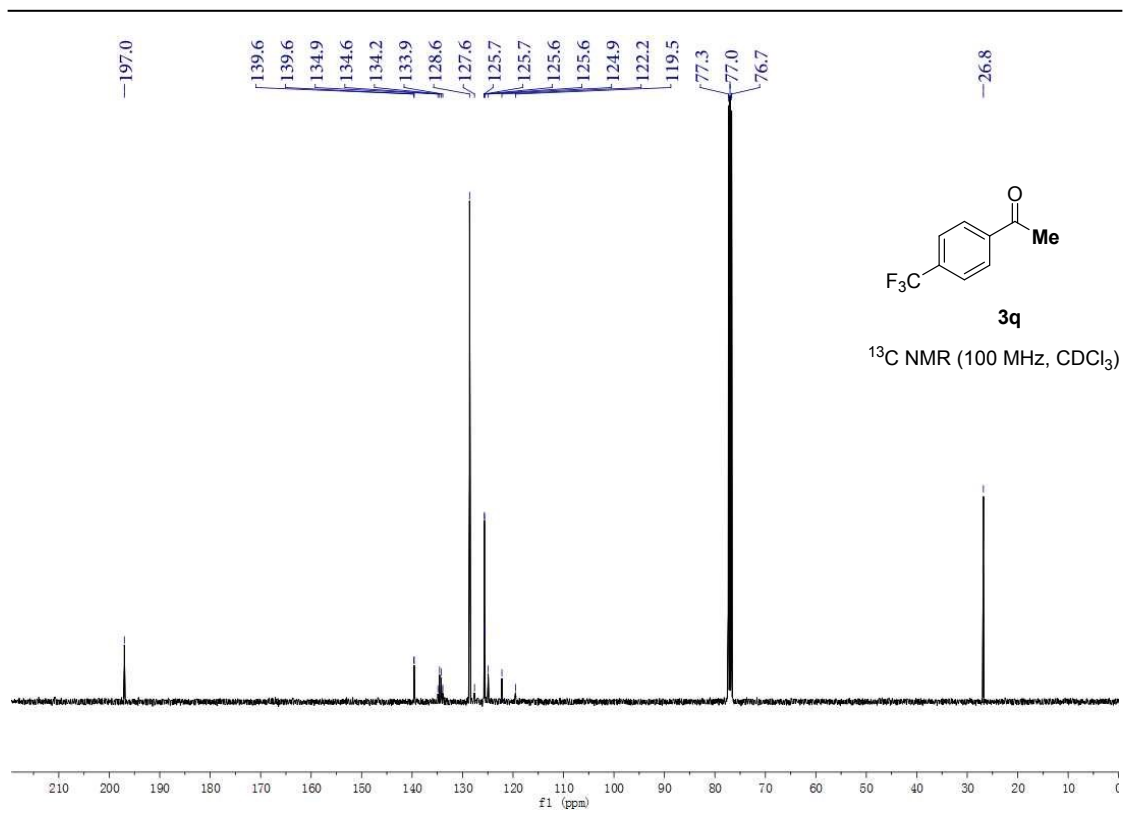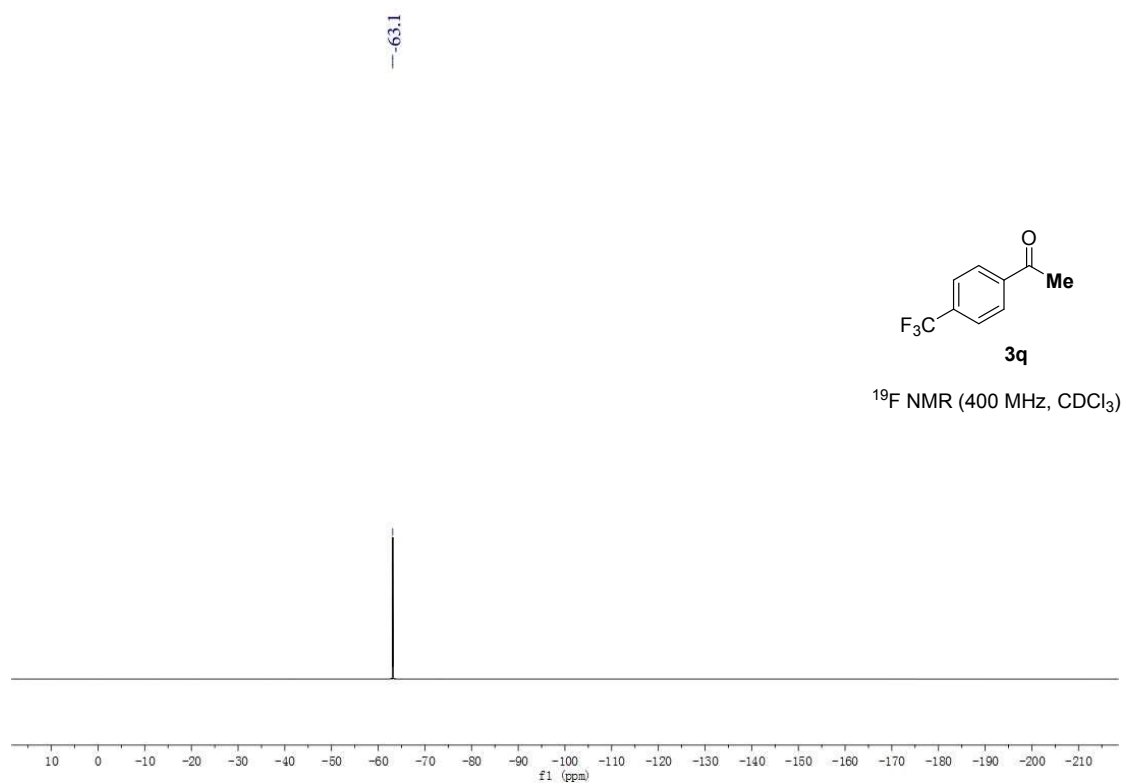

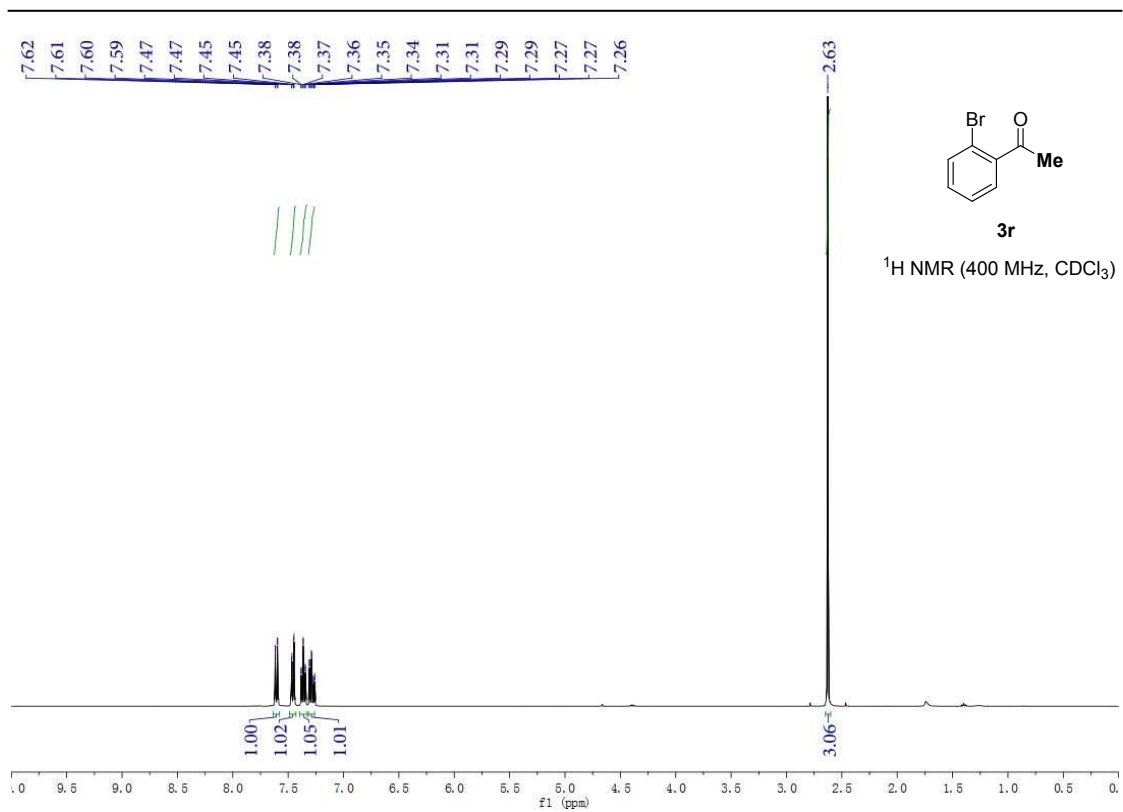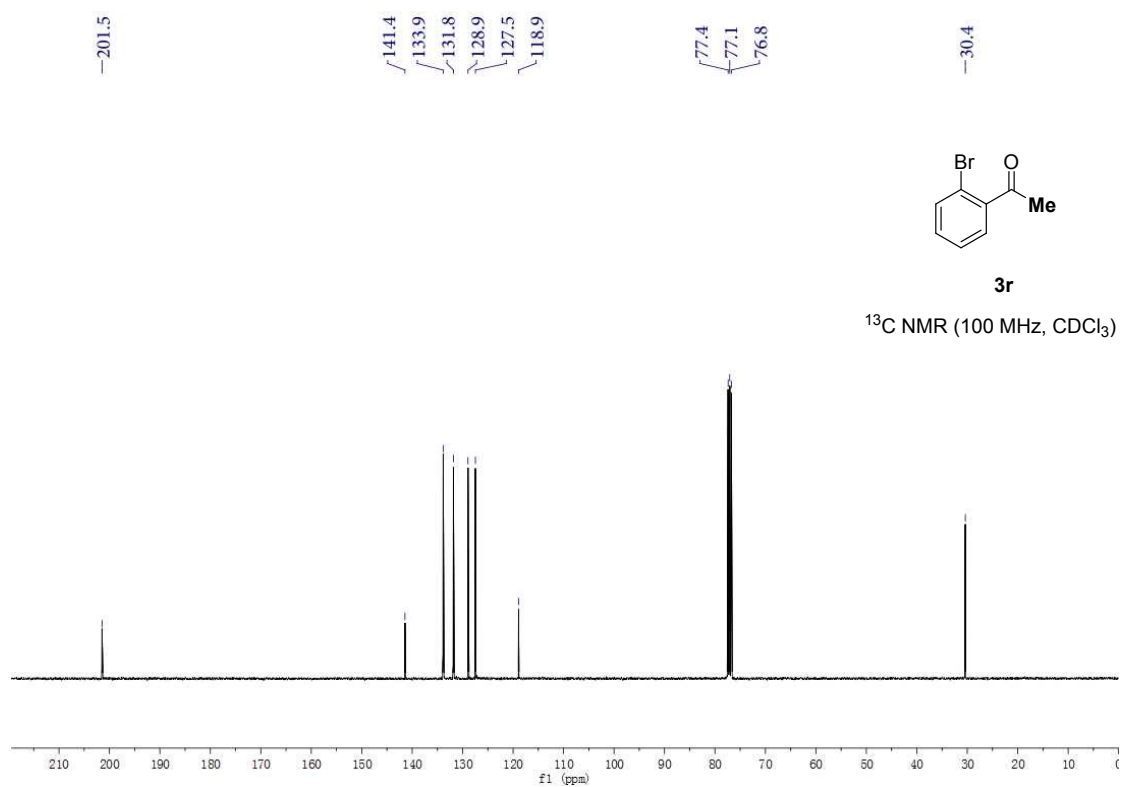

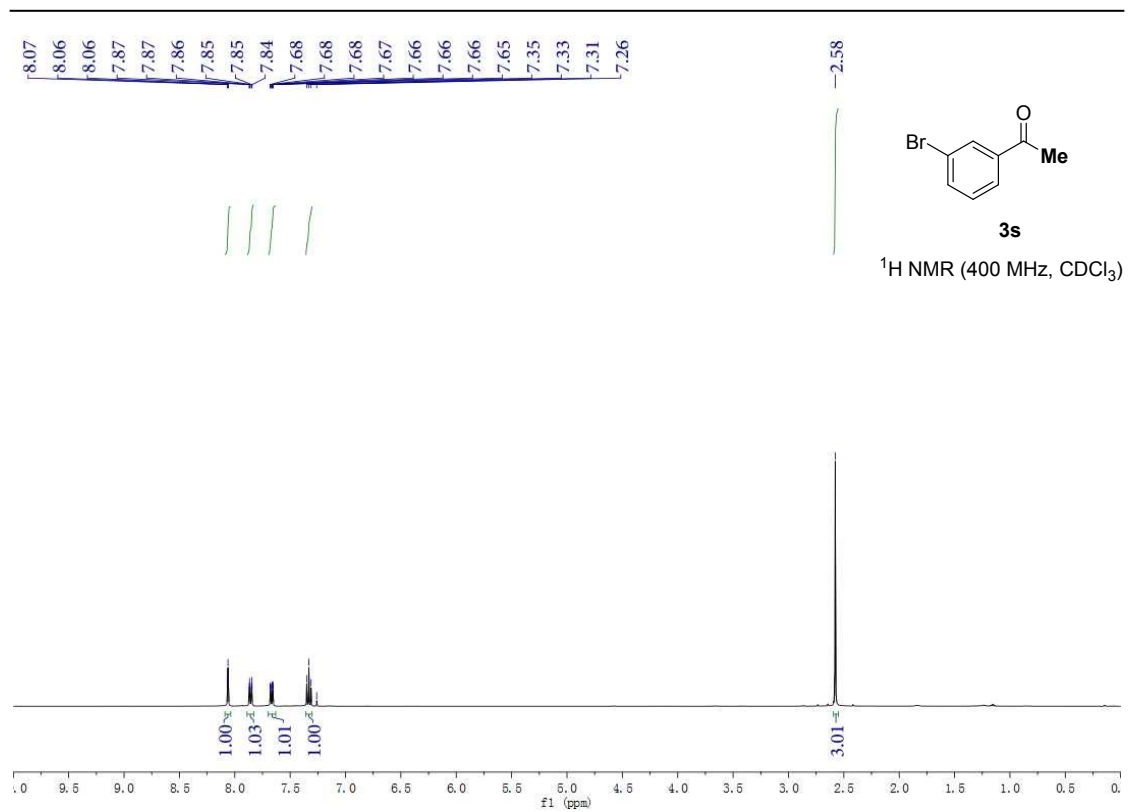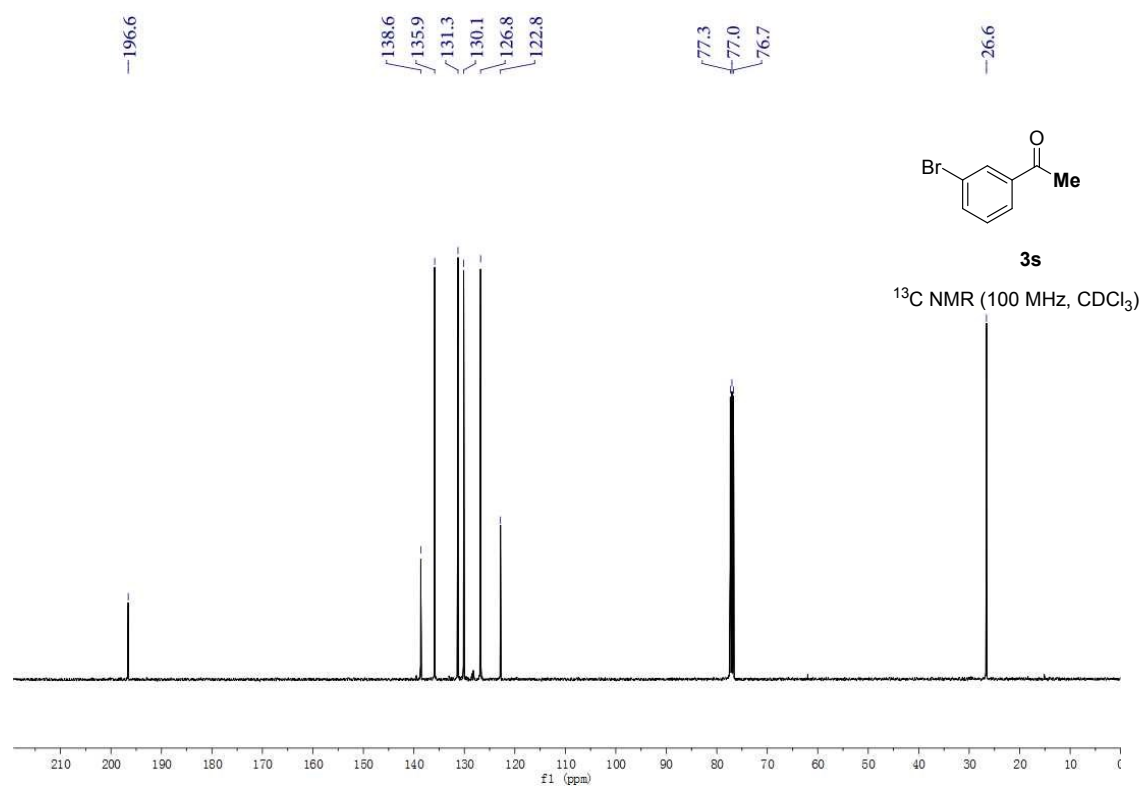

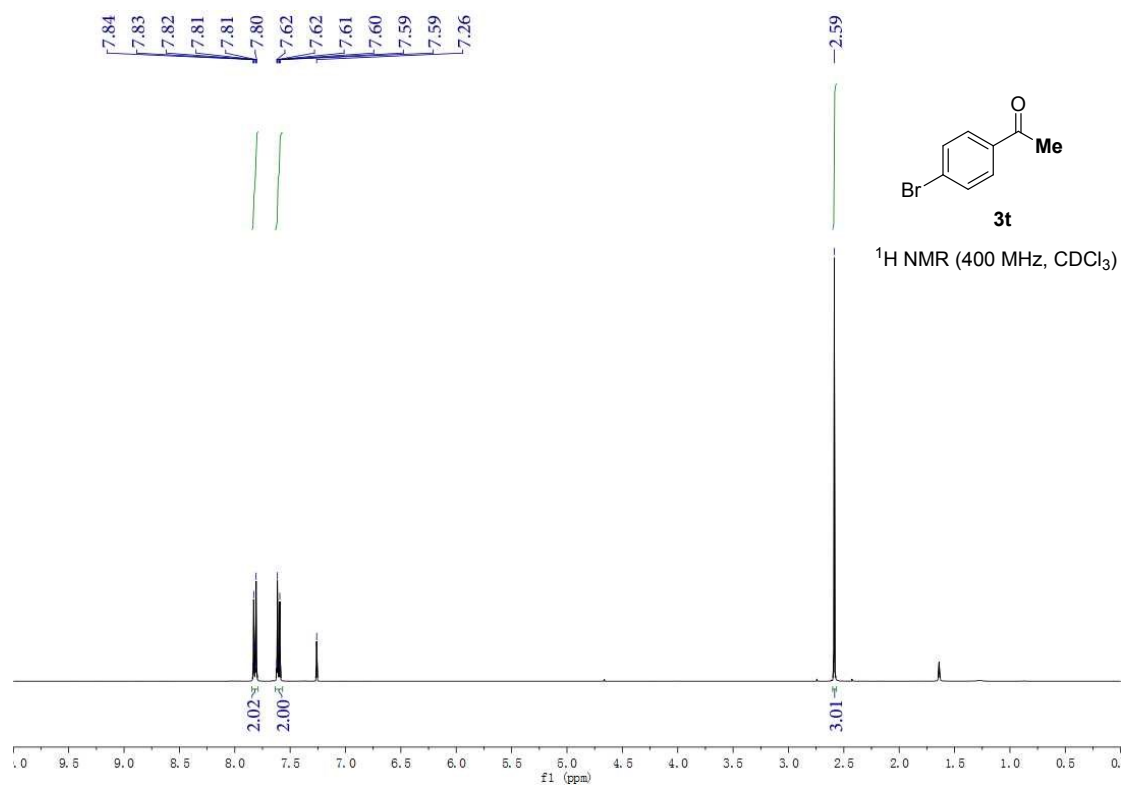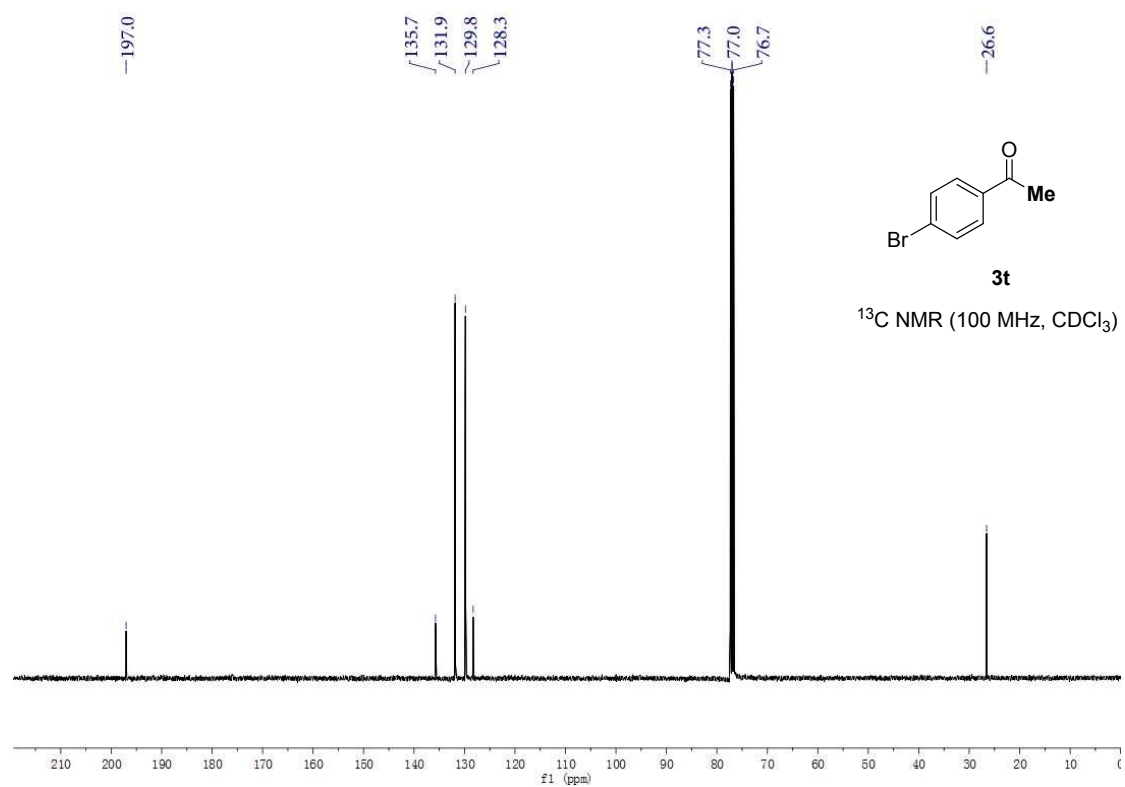

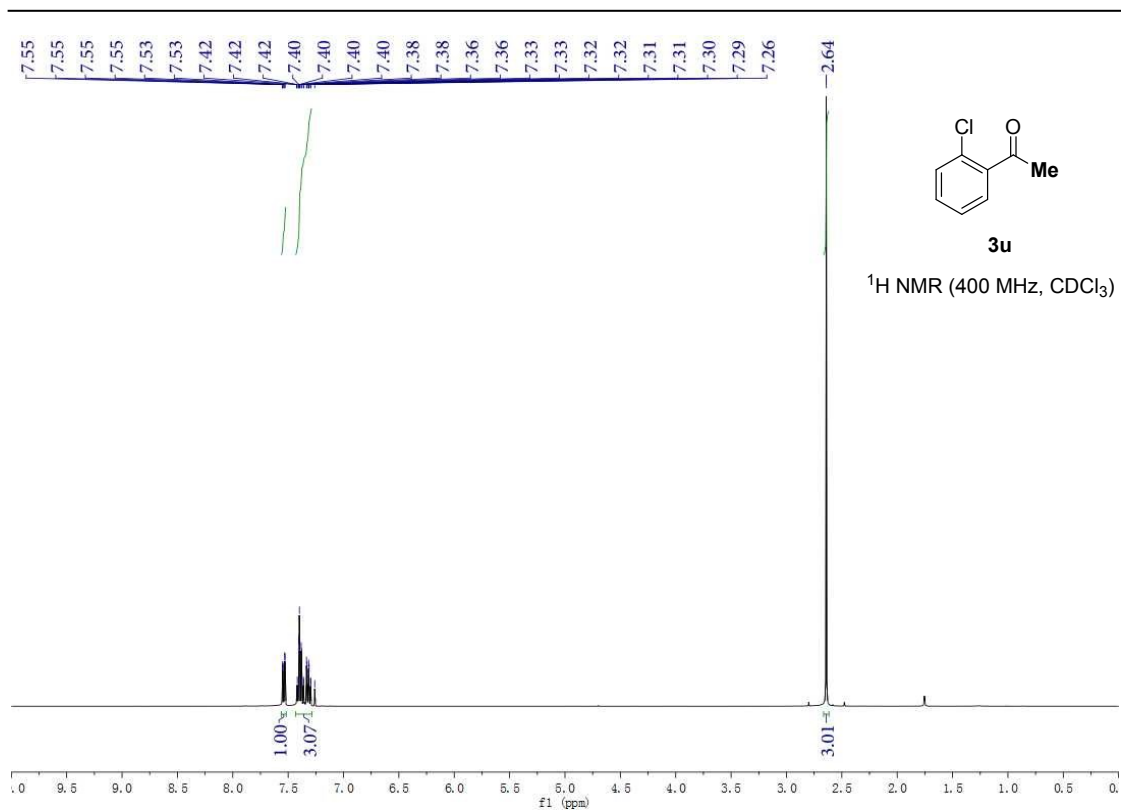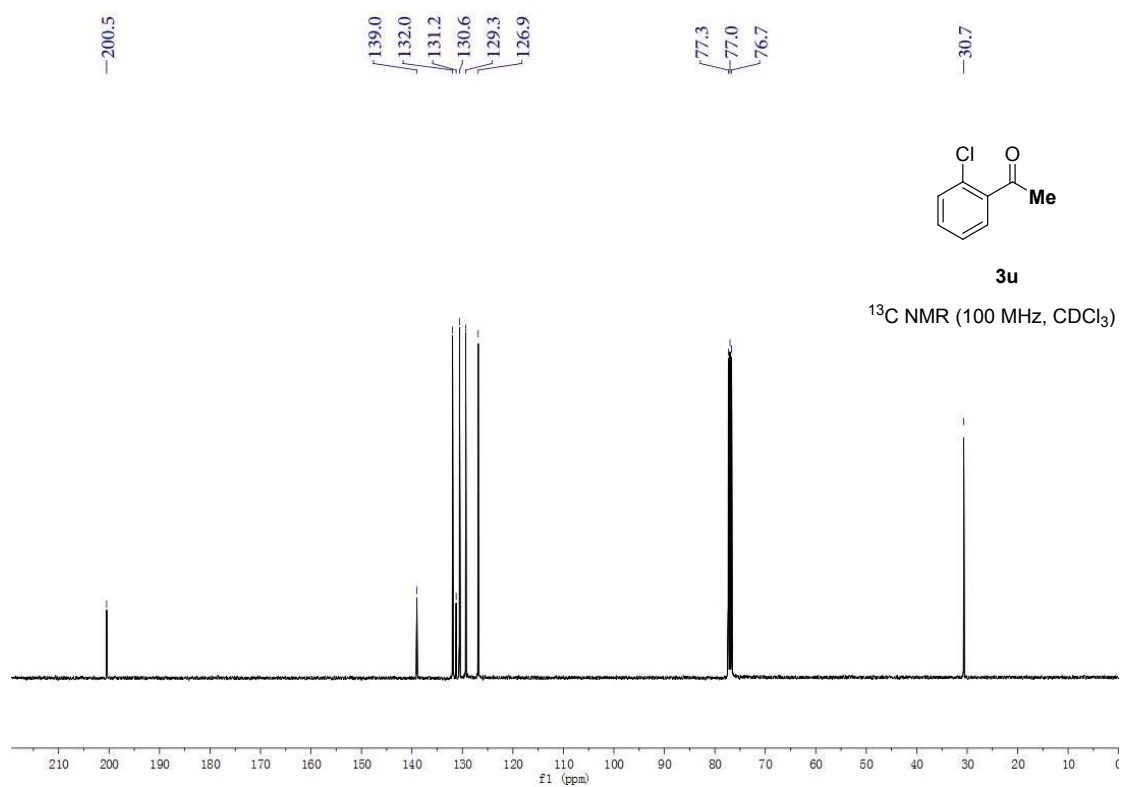

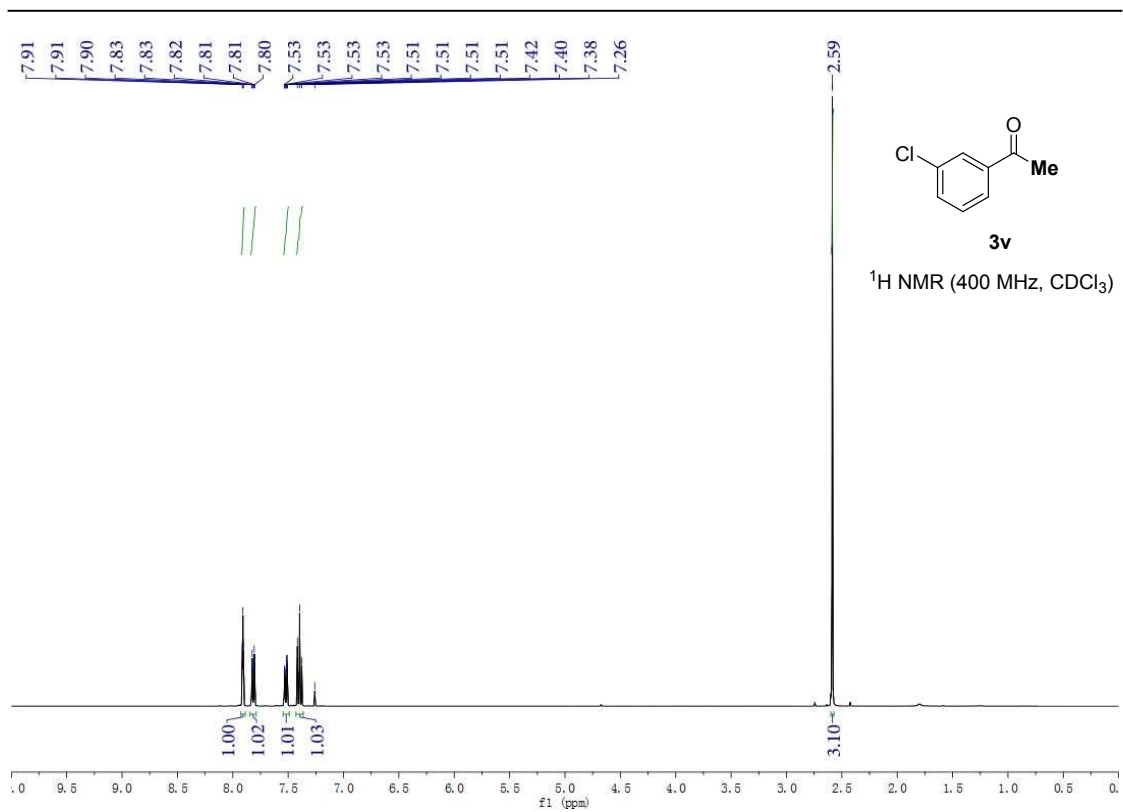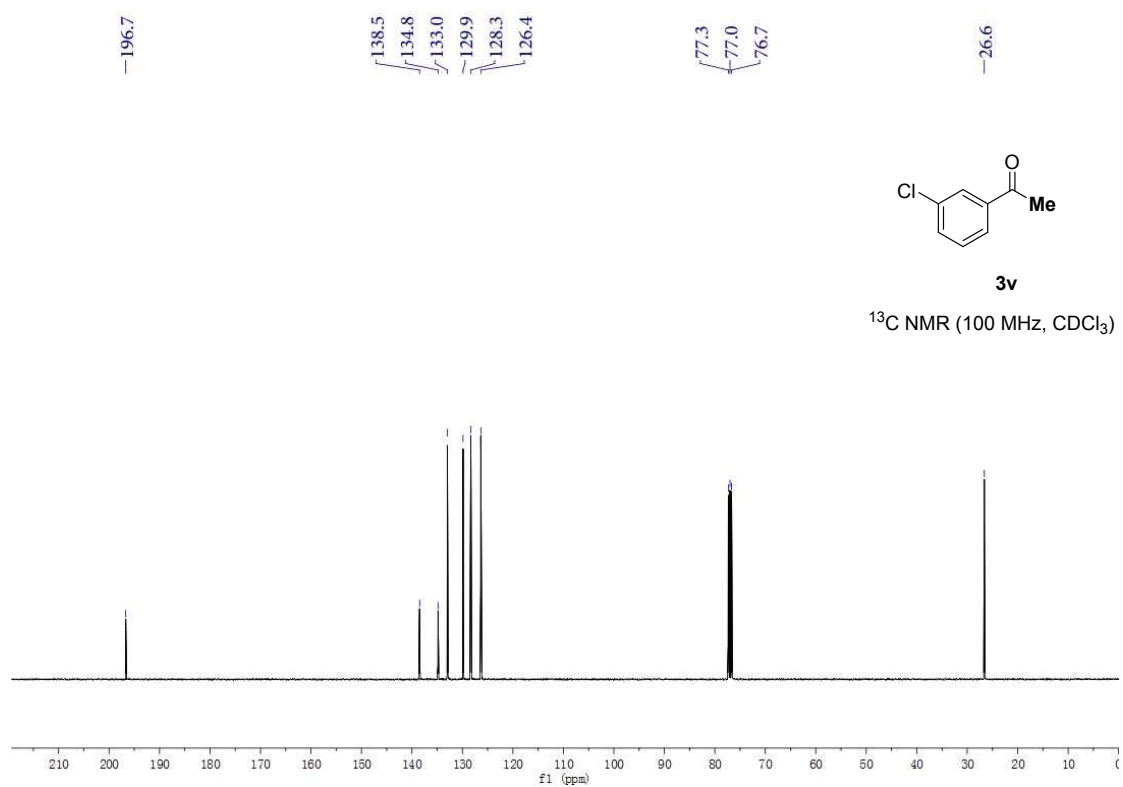



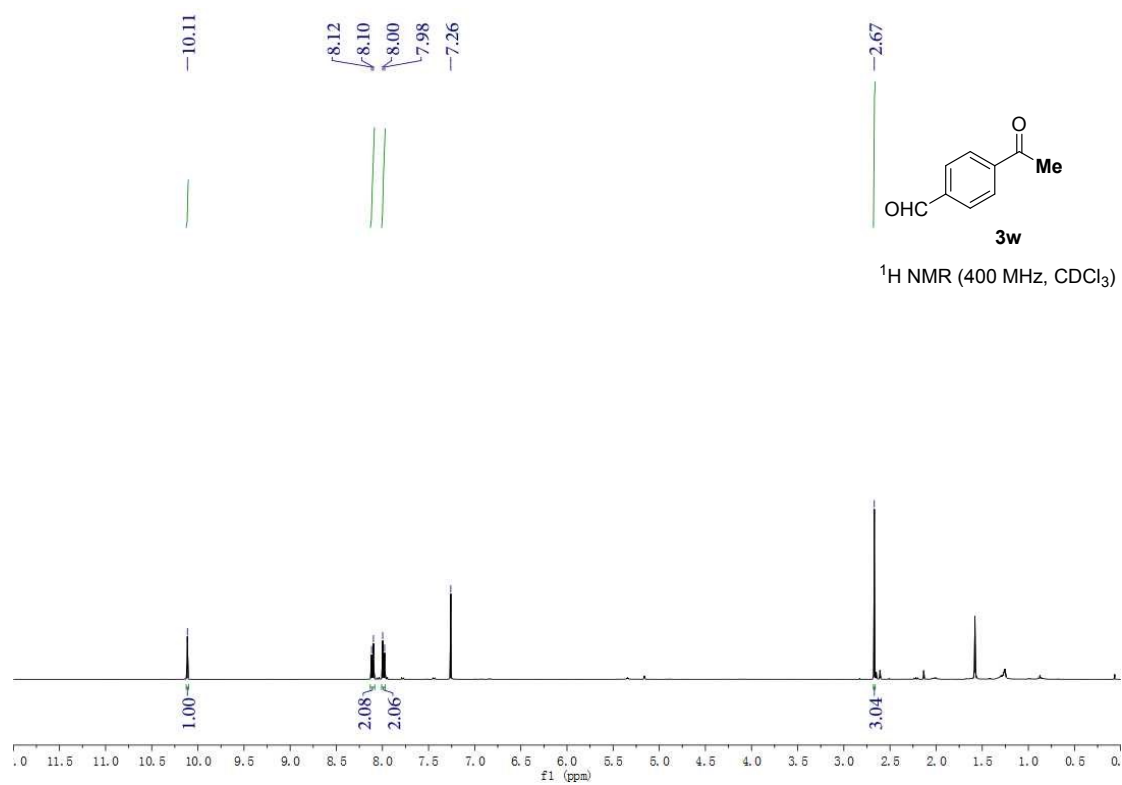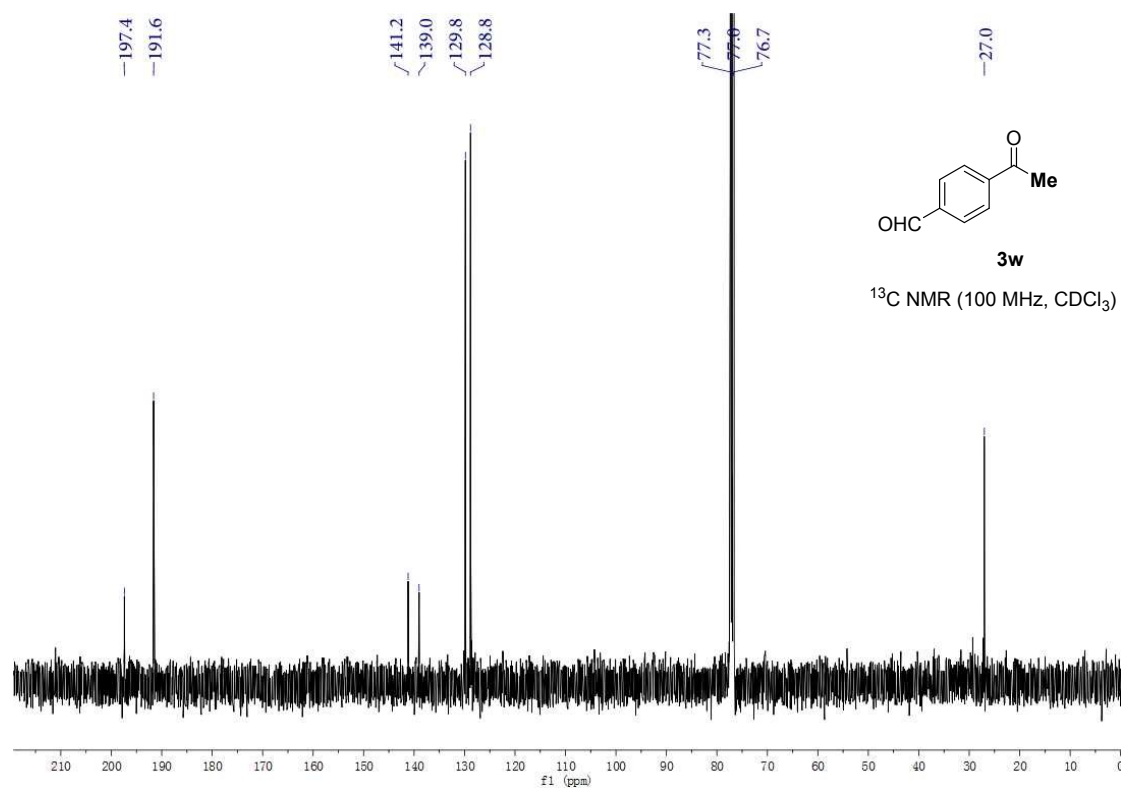

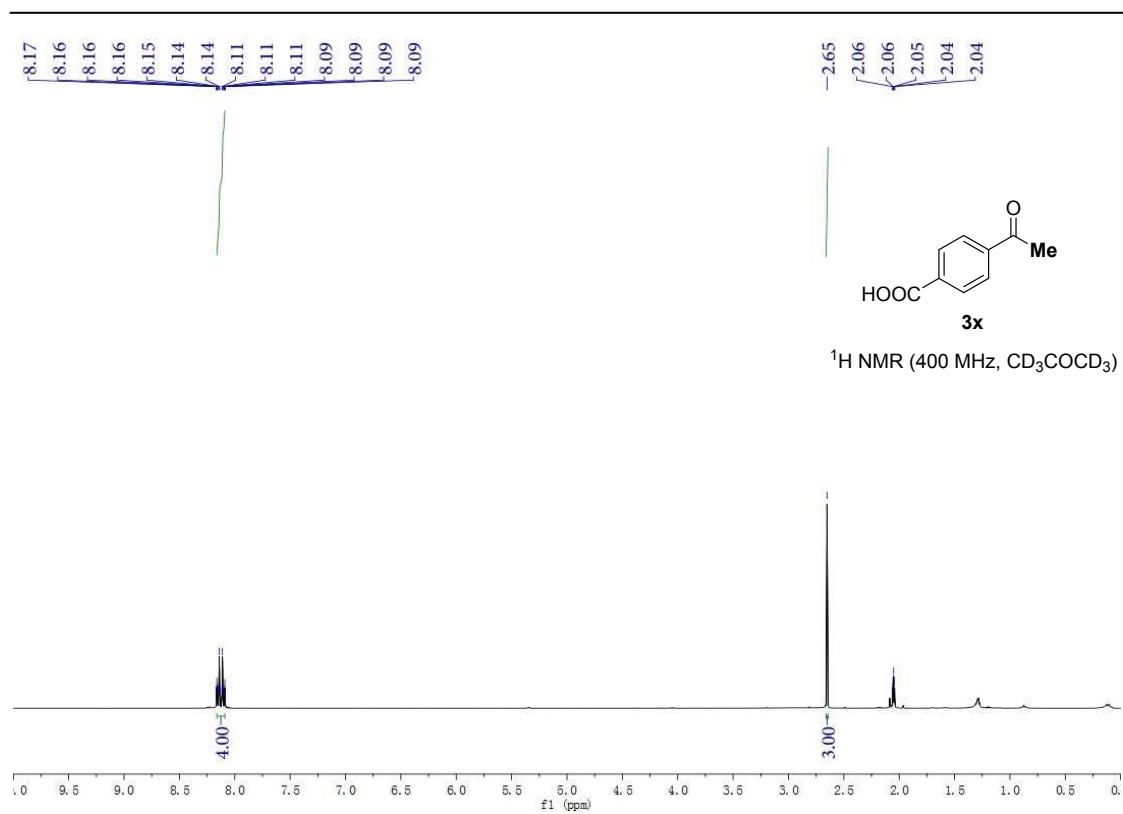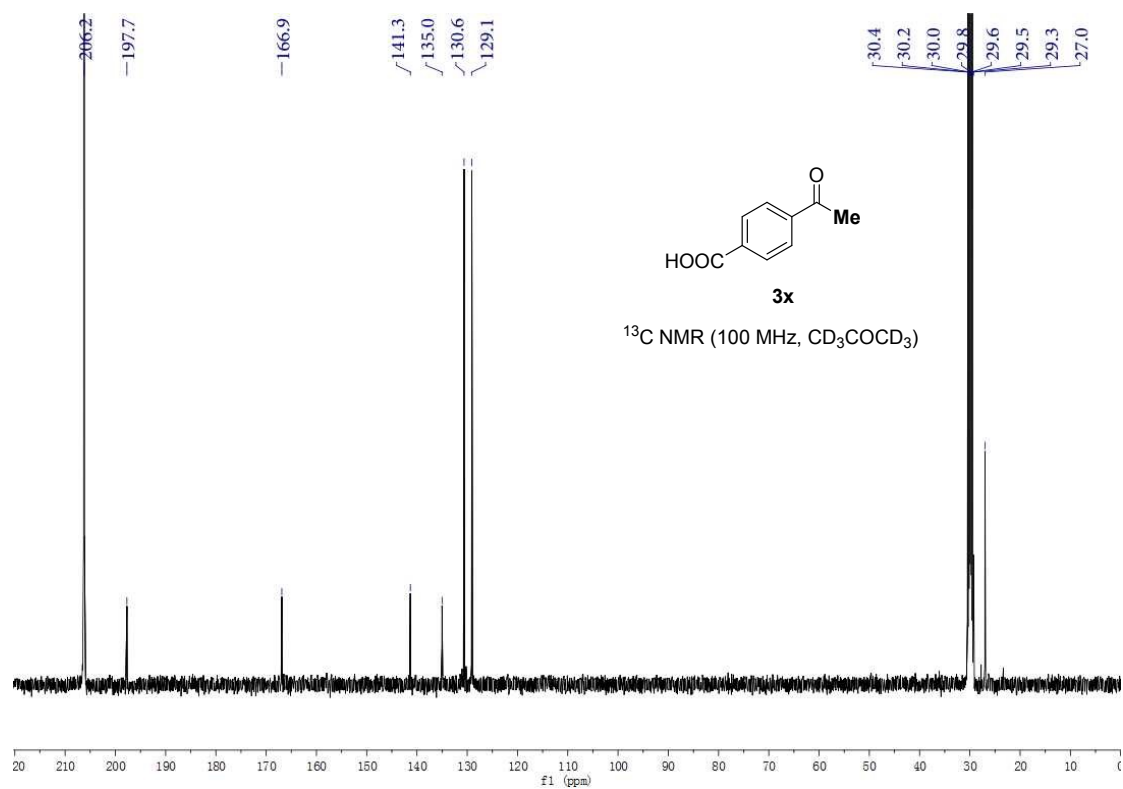

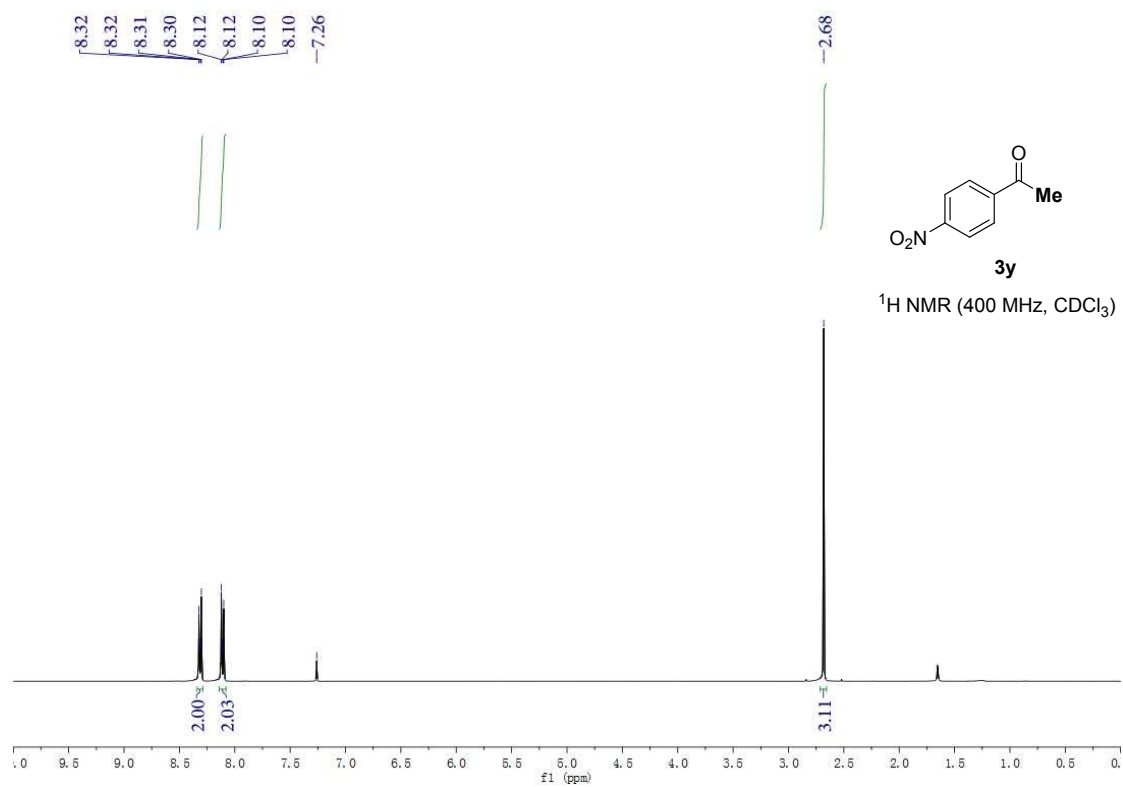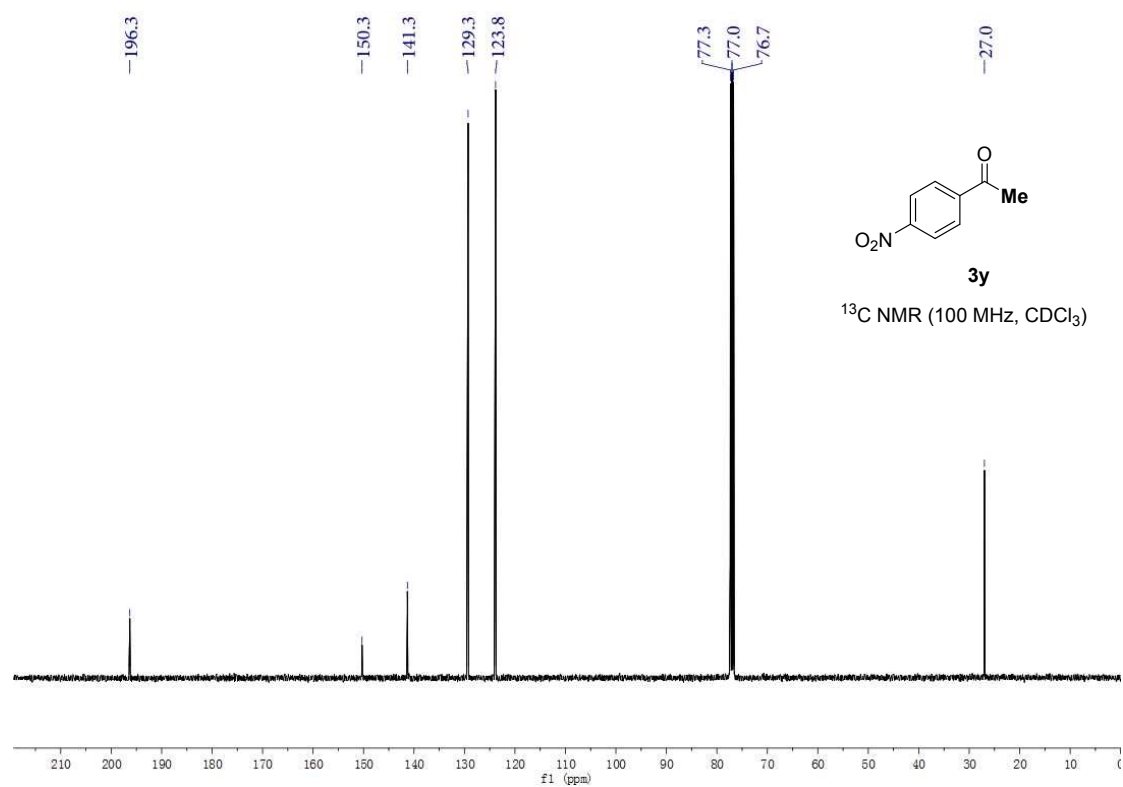

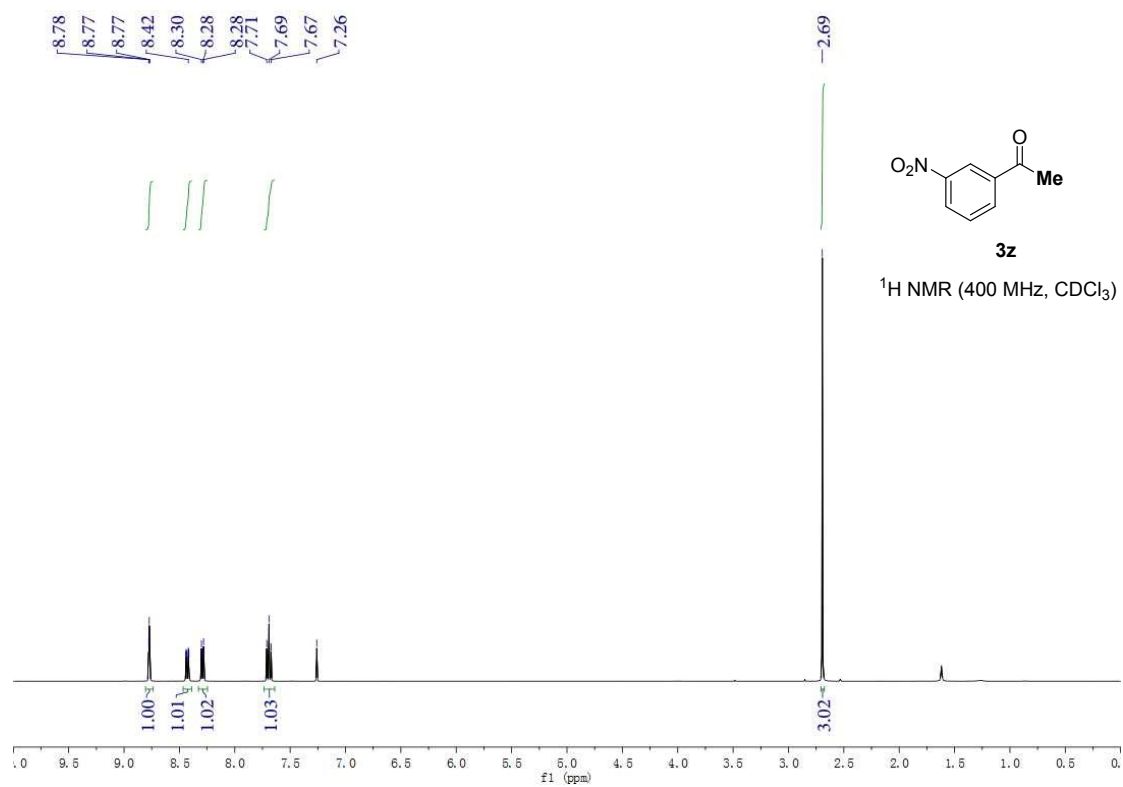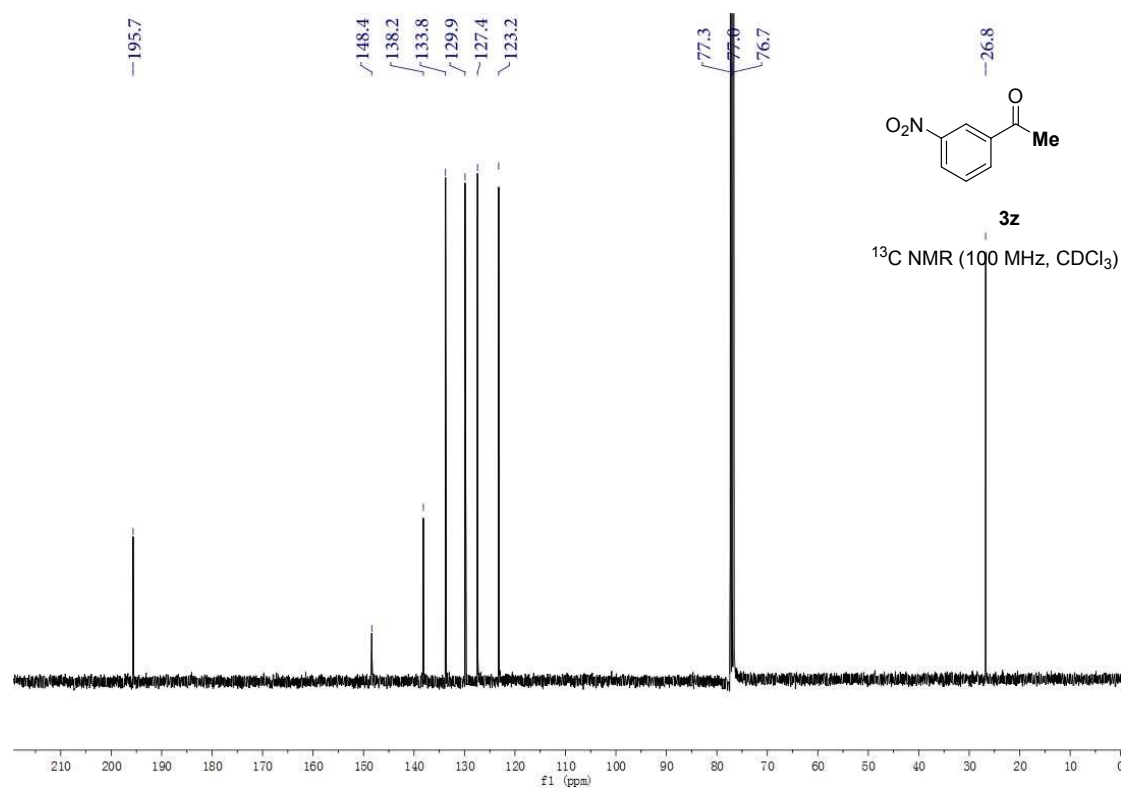

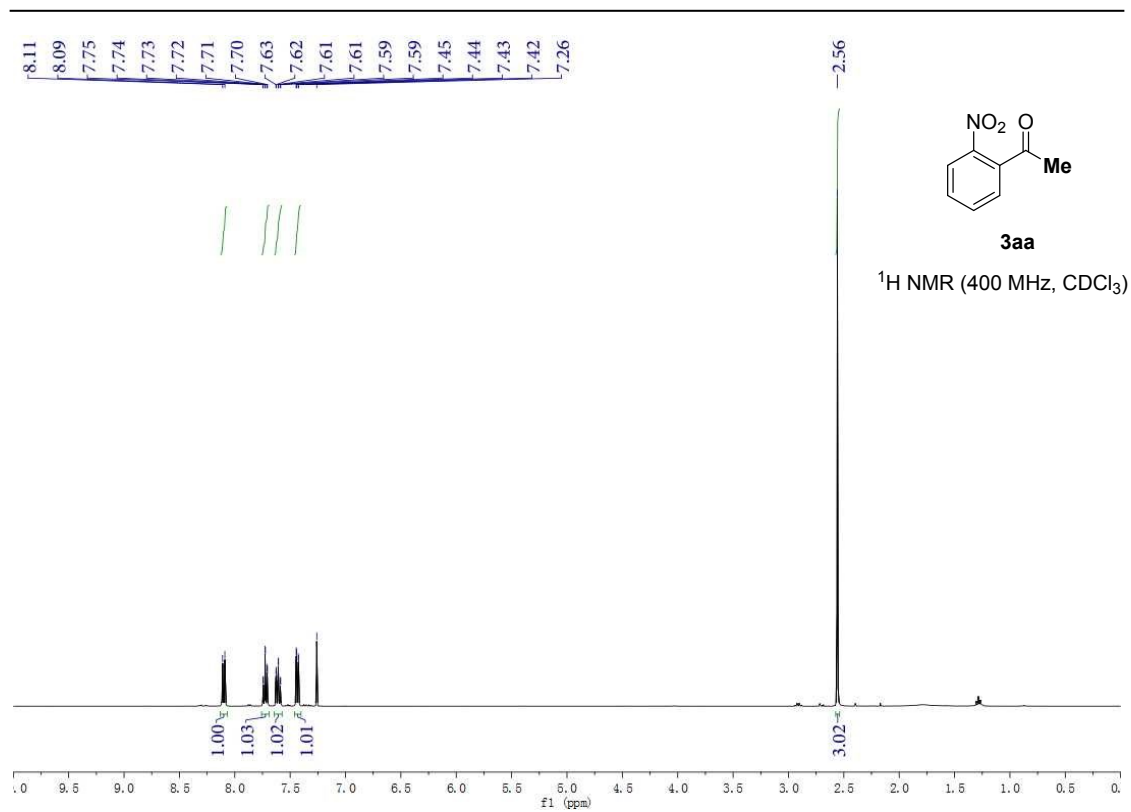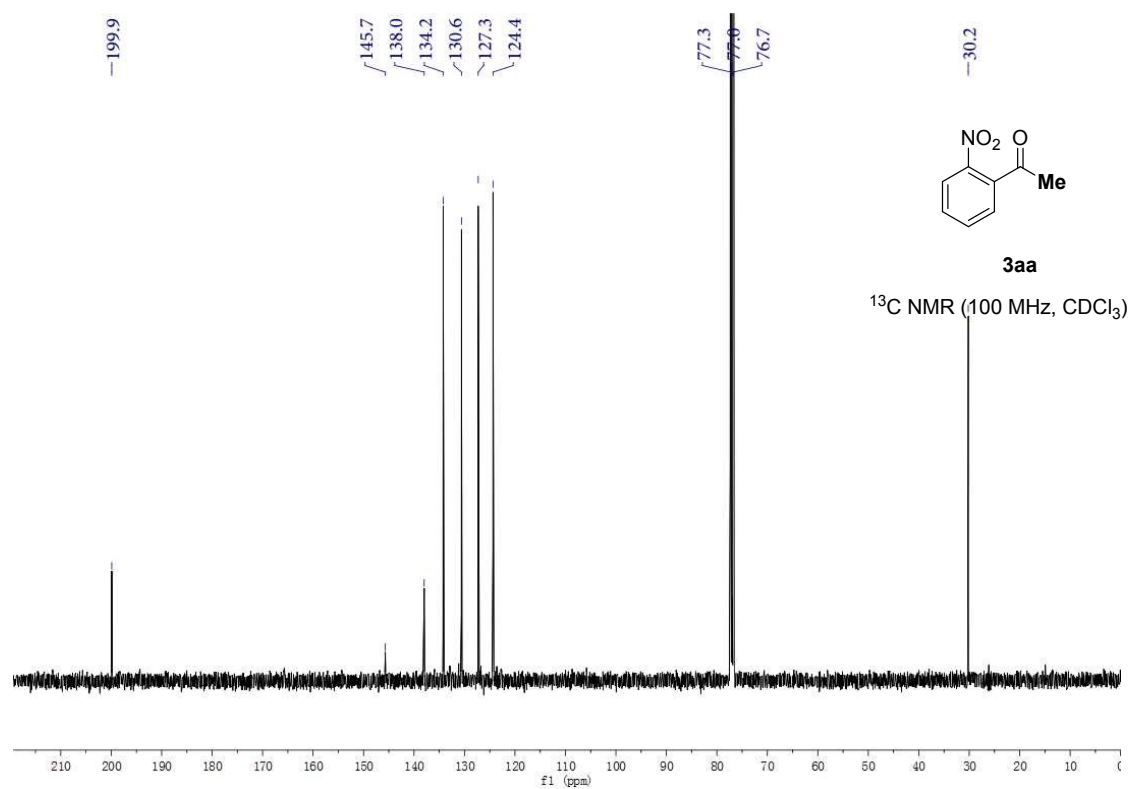

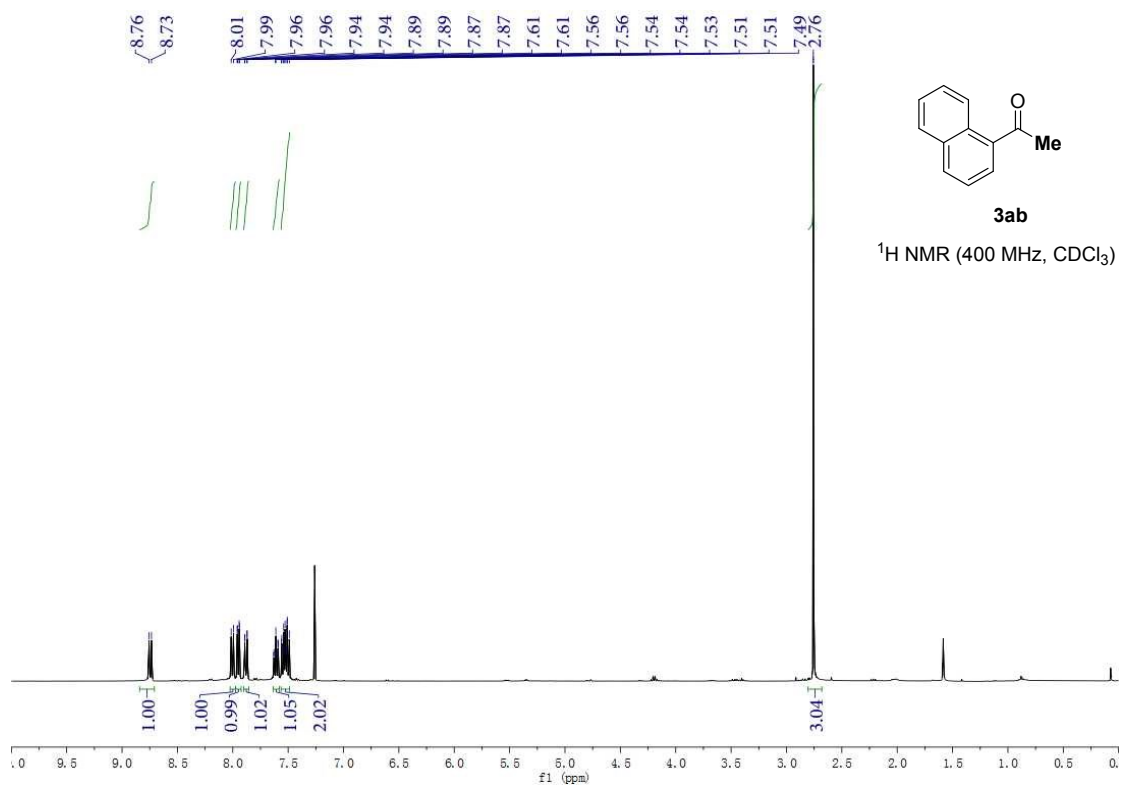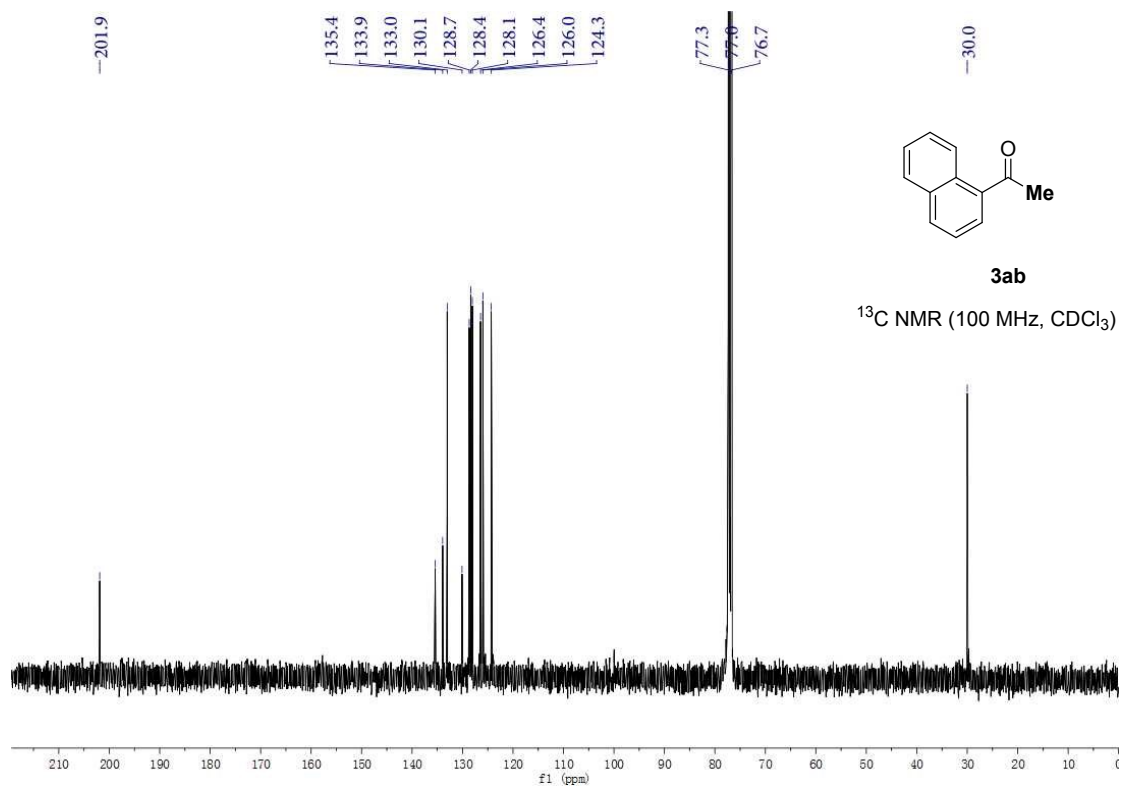

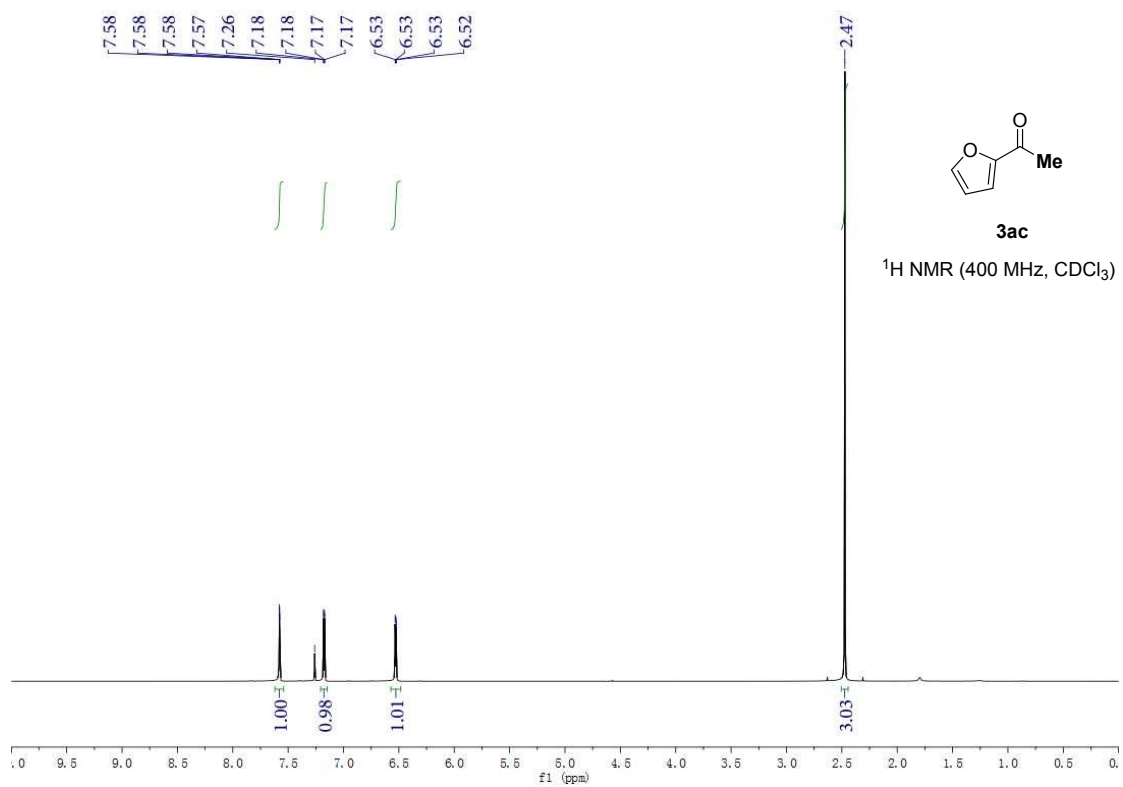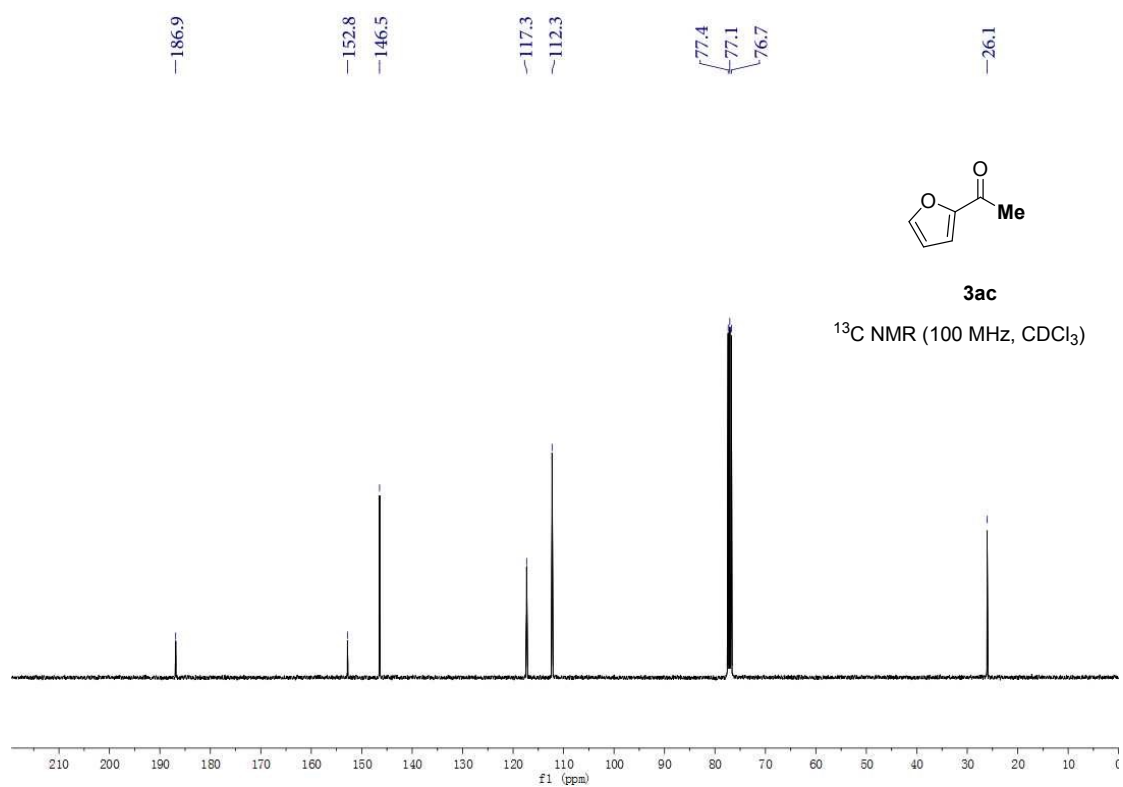

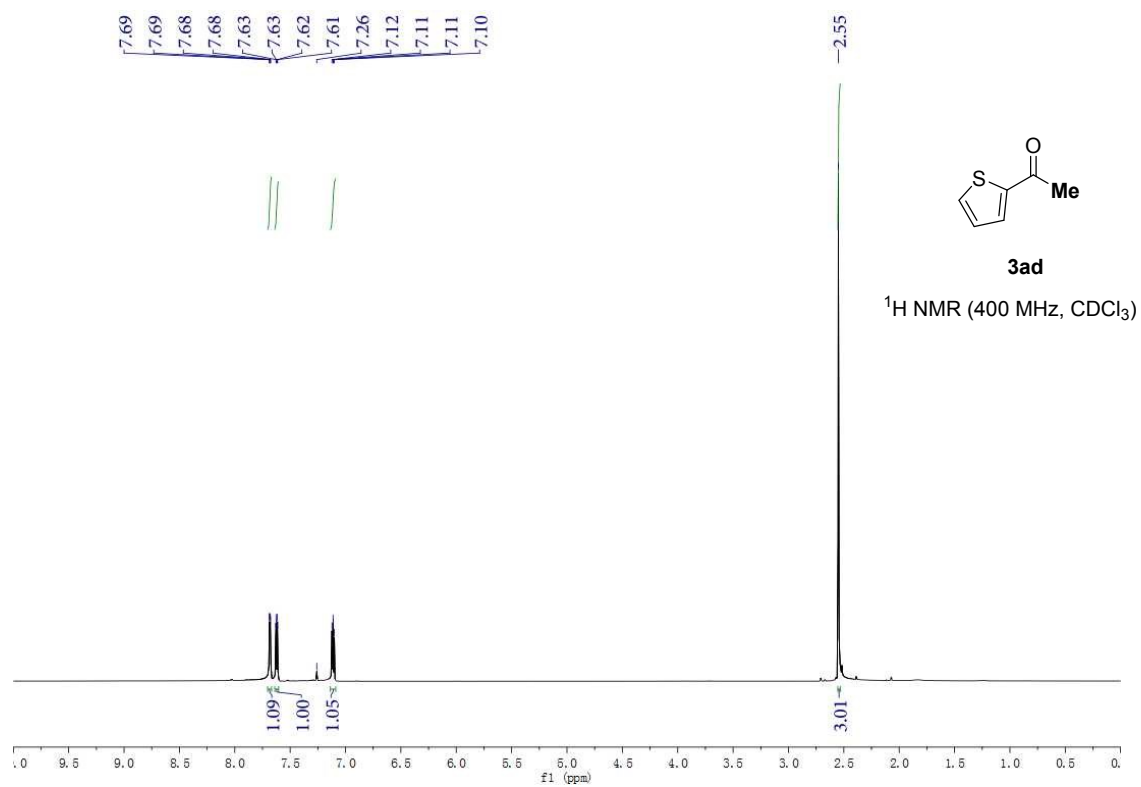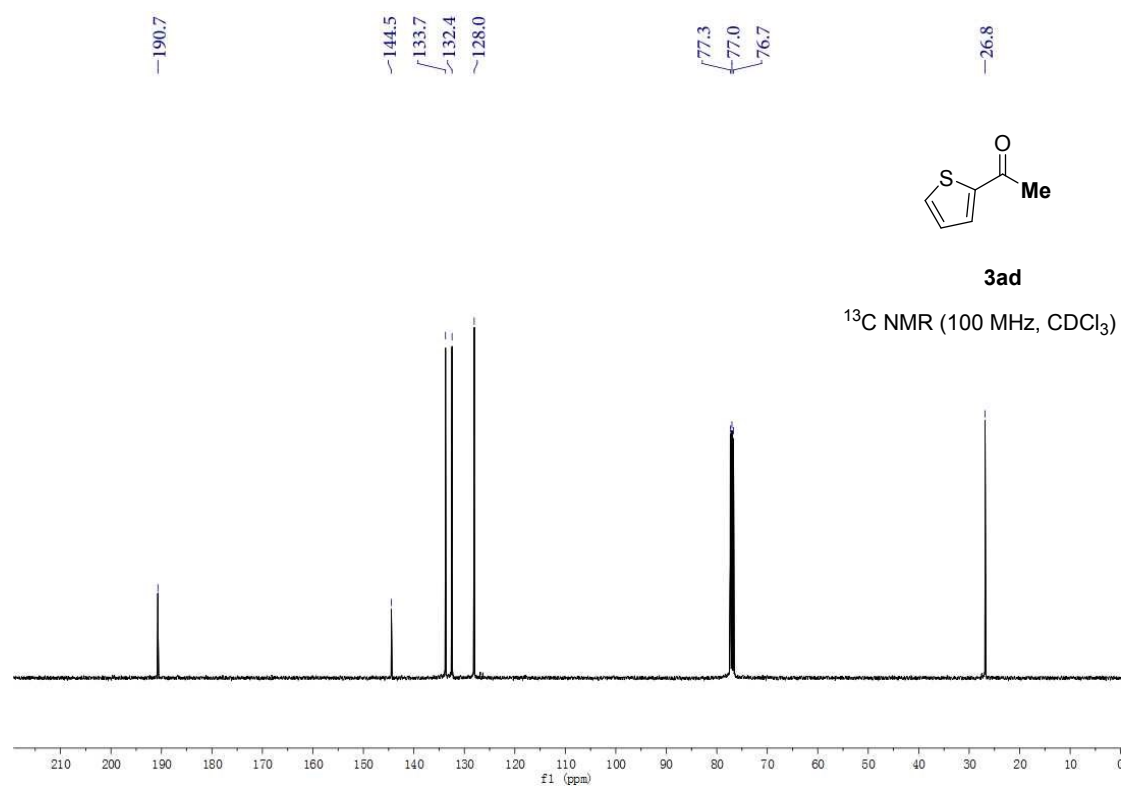



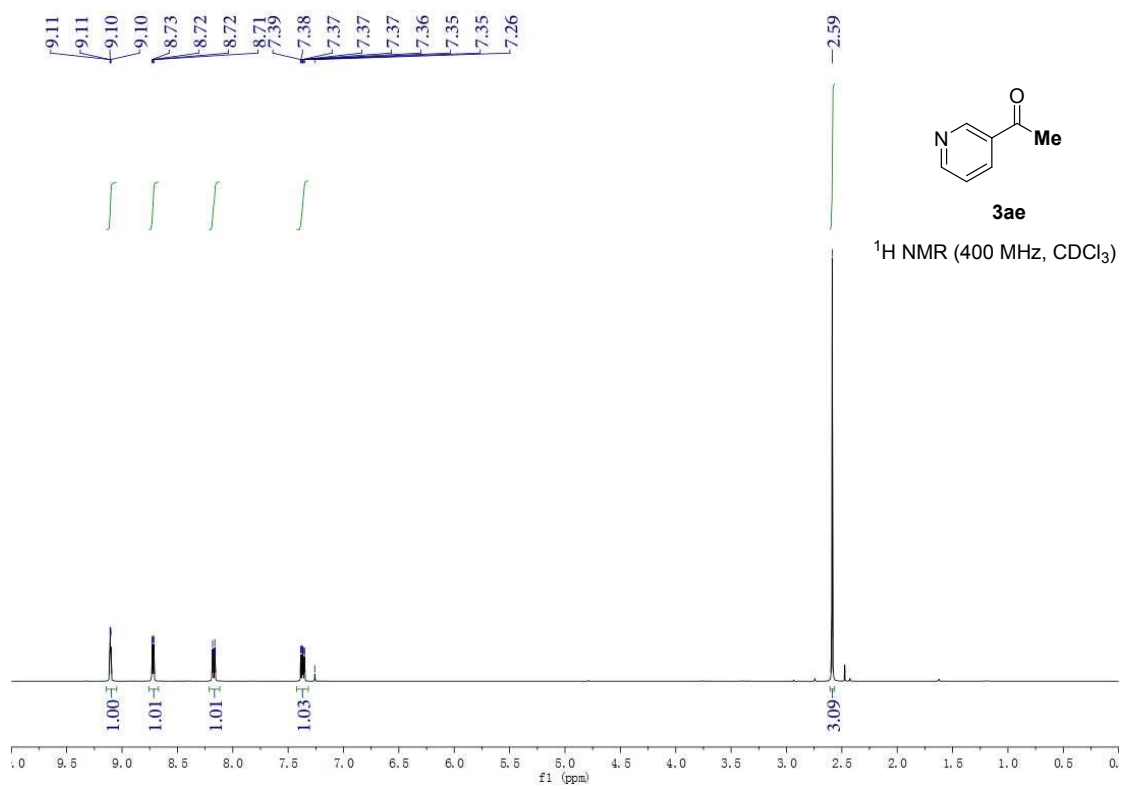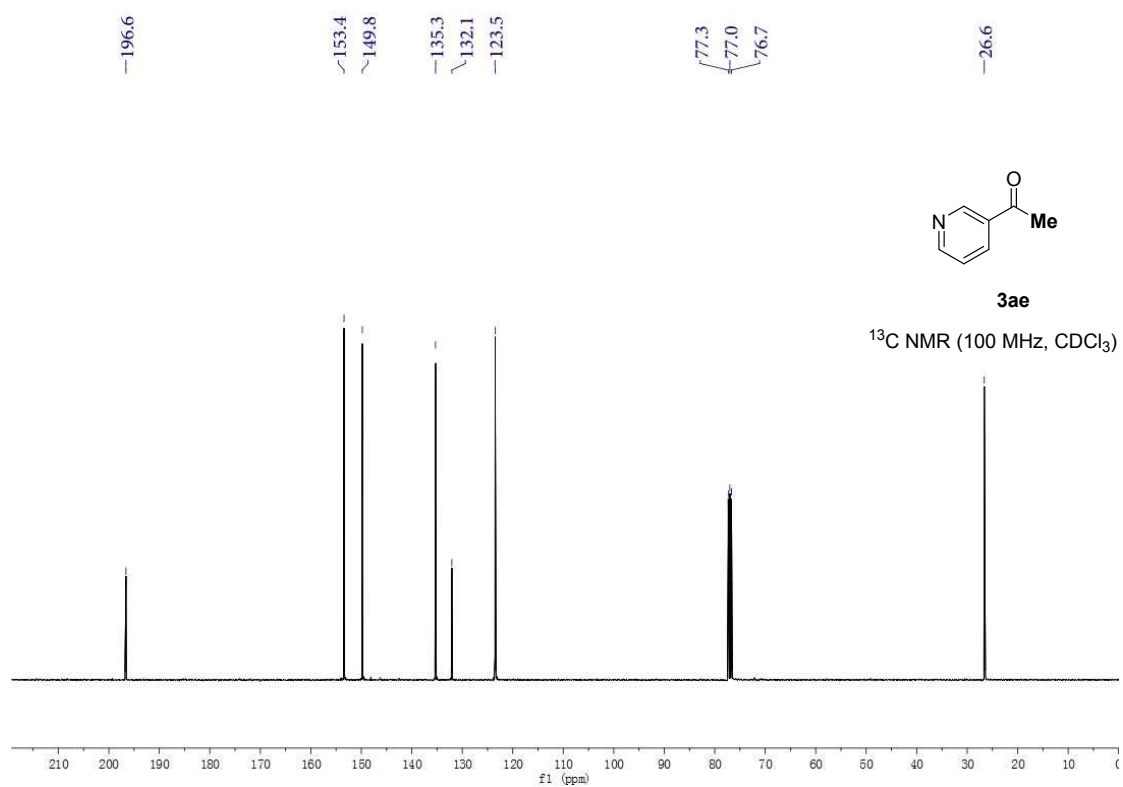

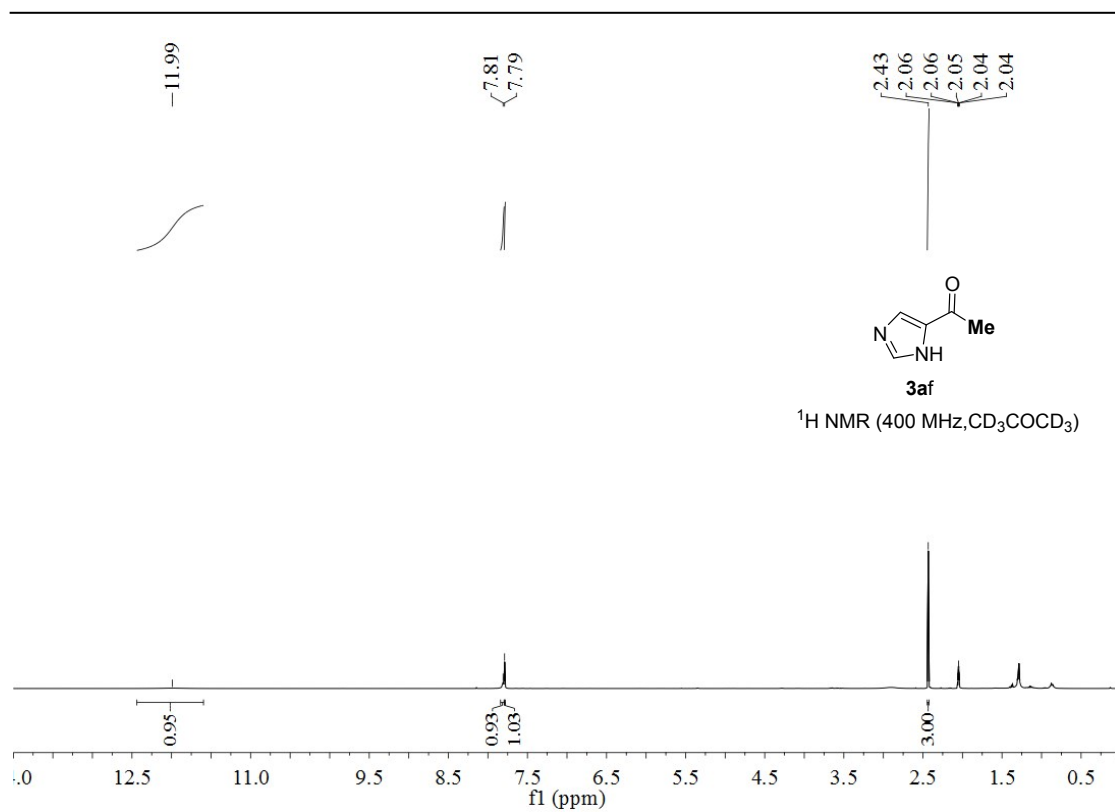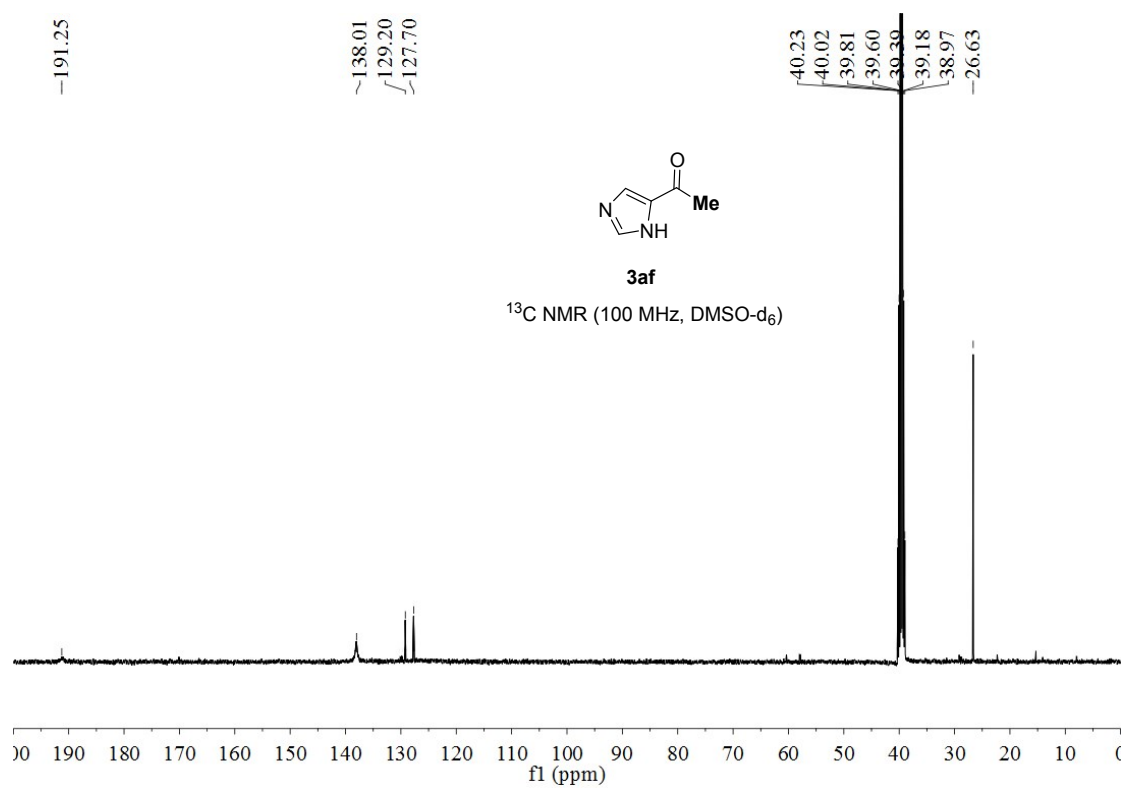

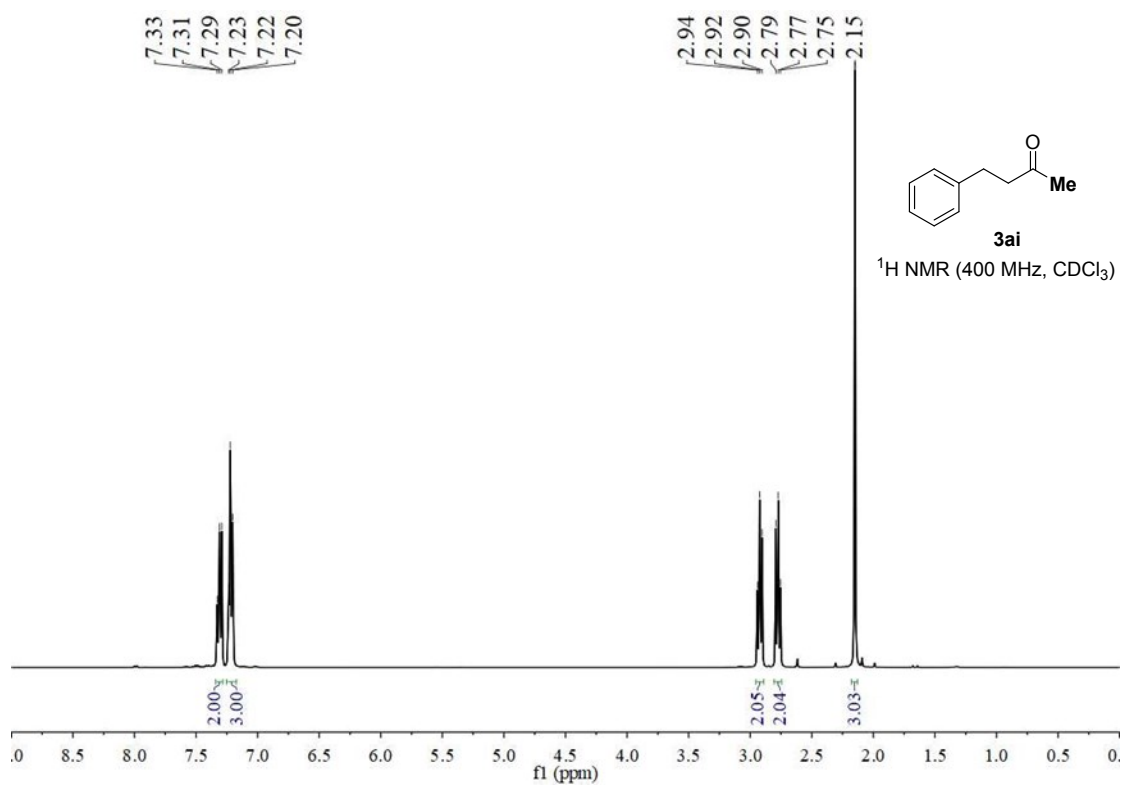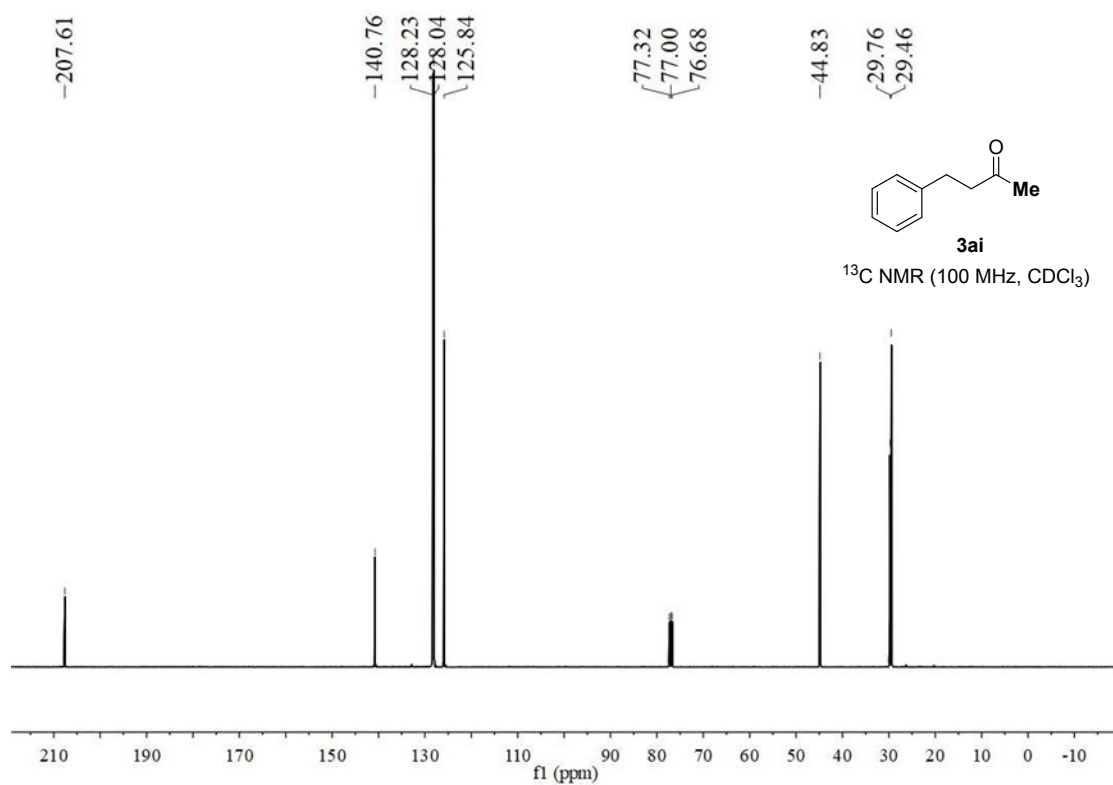

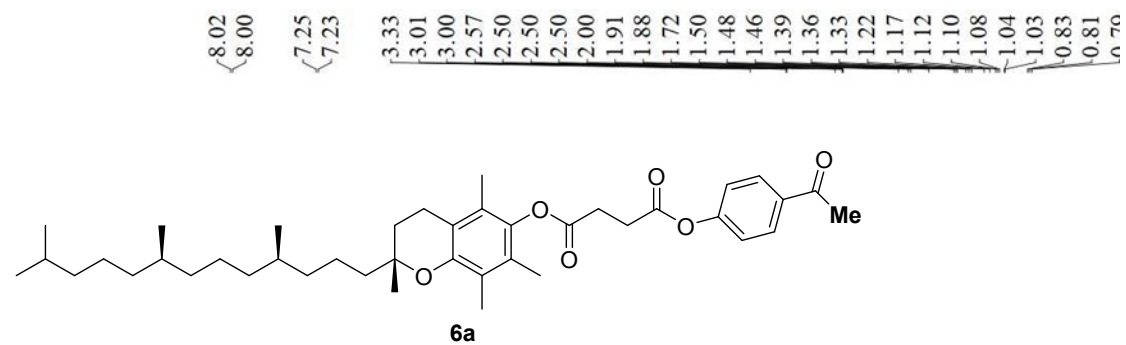 $^1\text{H}$  NMR (400 MHz, DMSO- $d_6$ )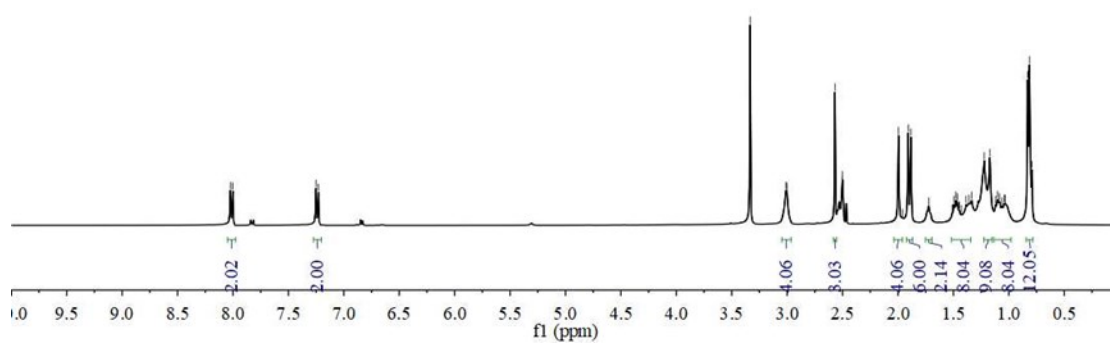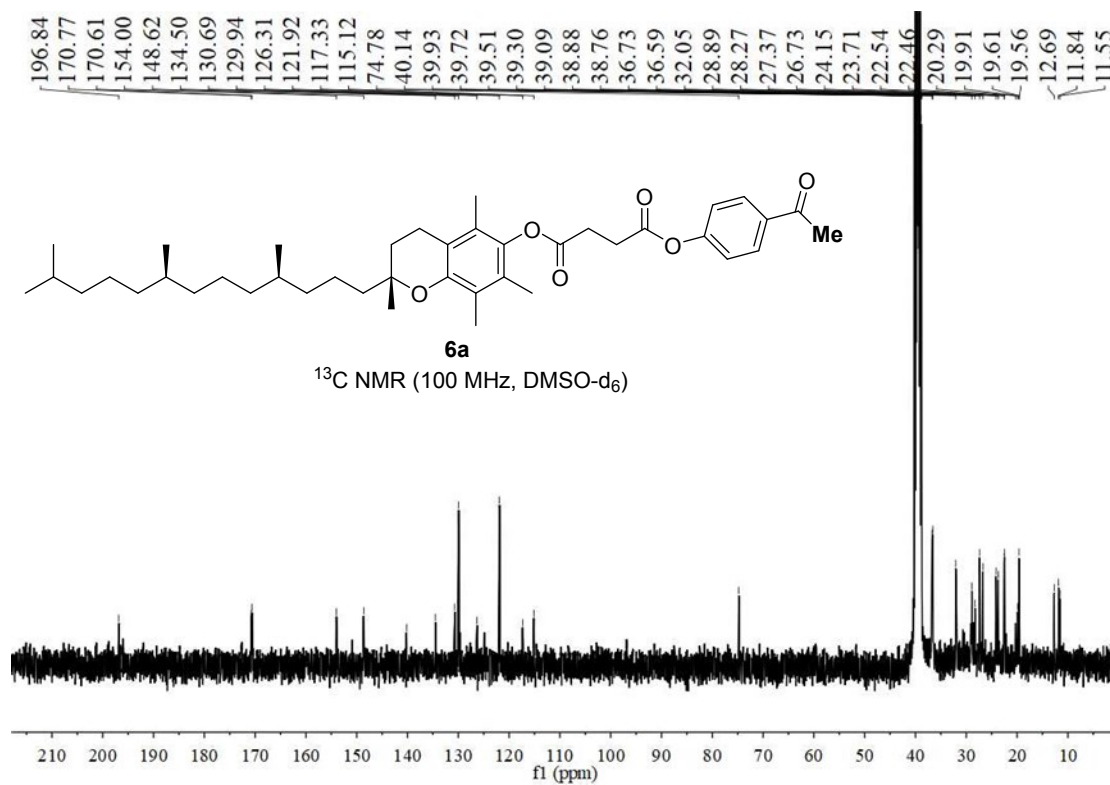

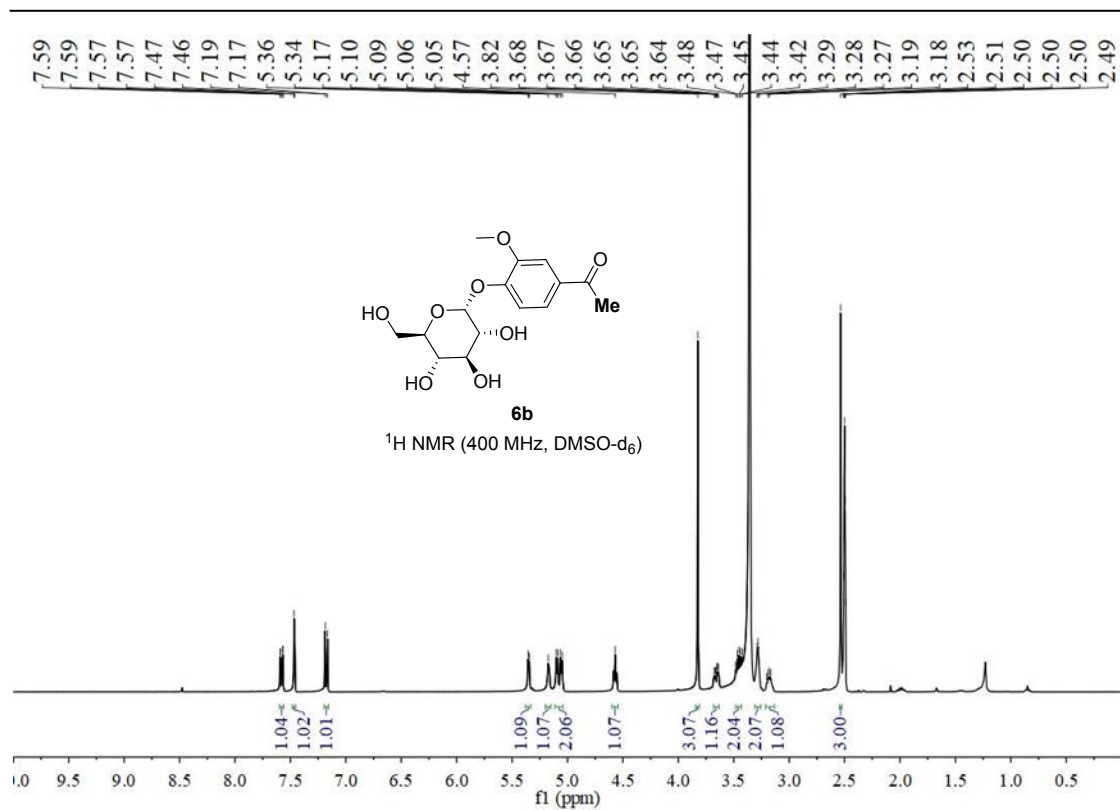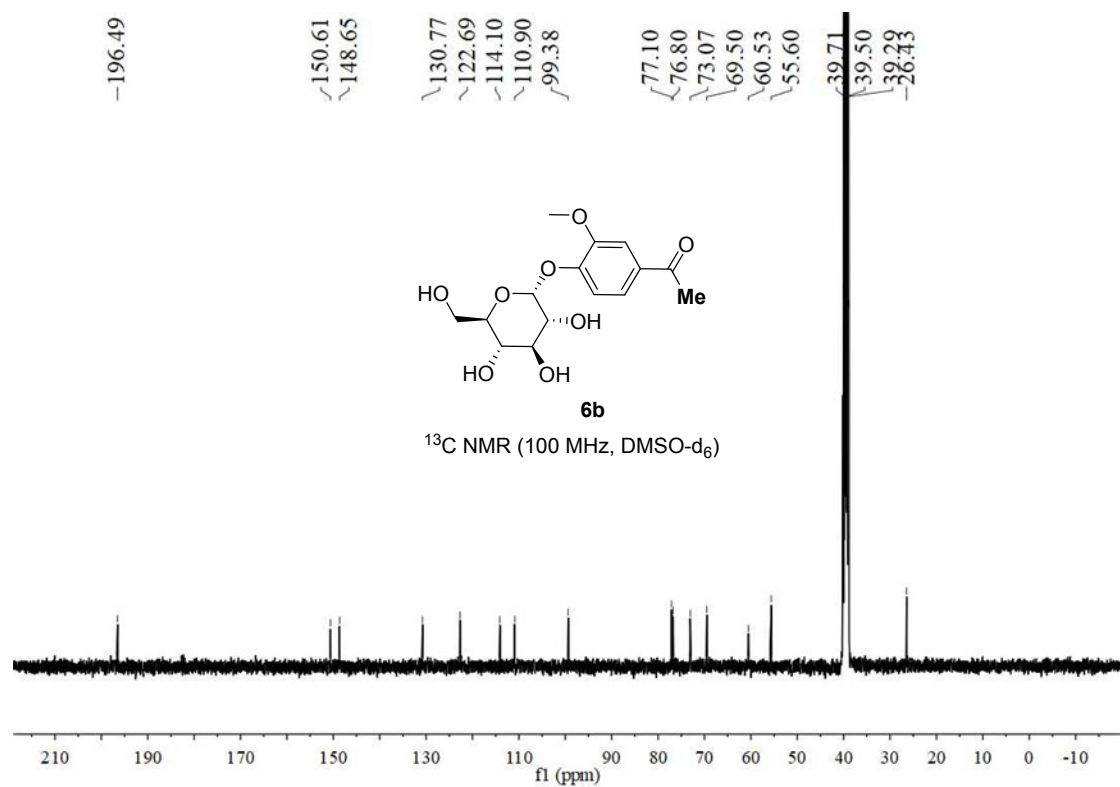

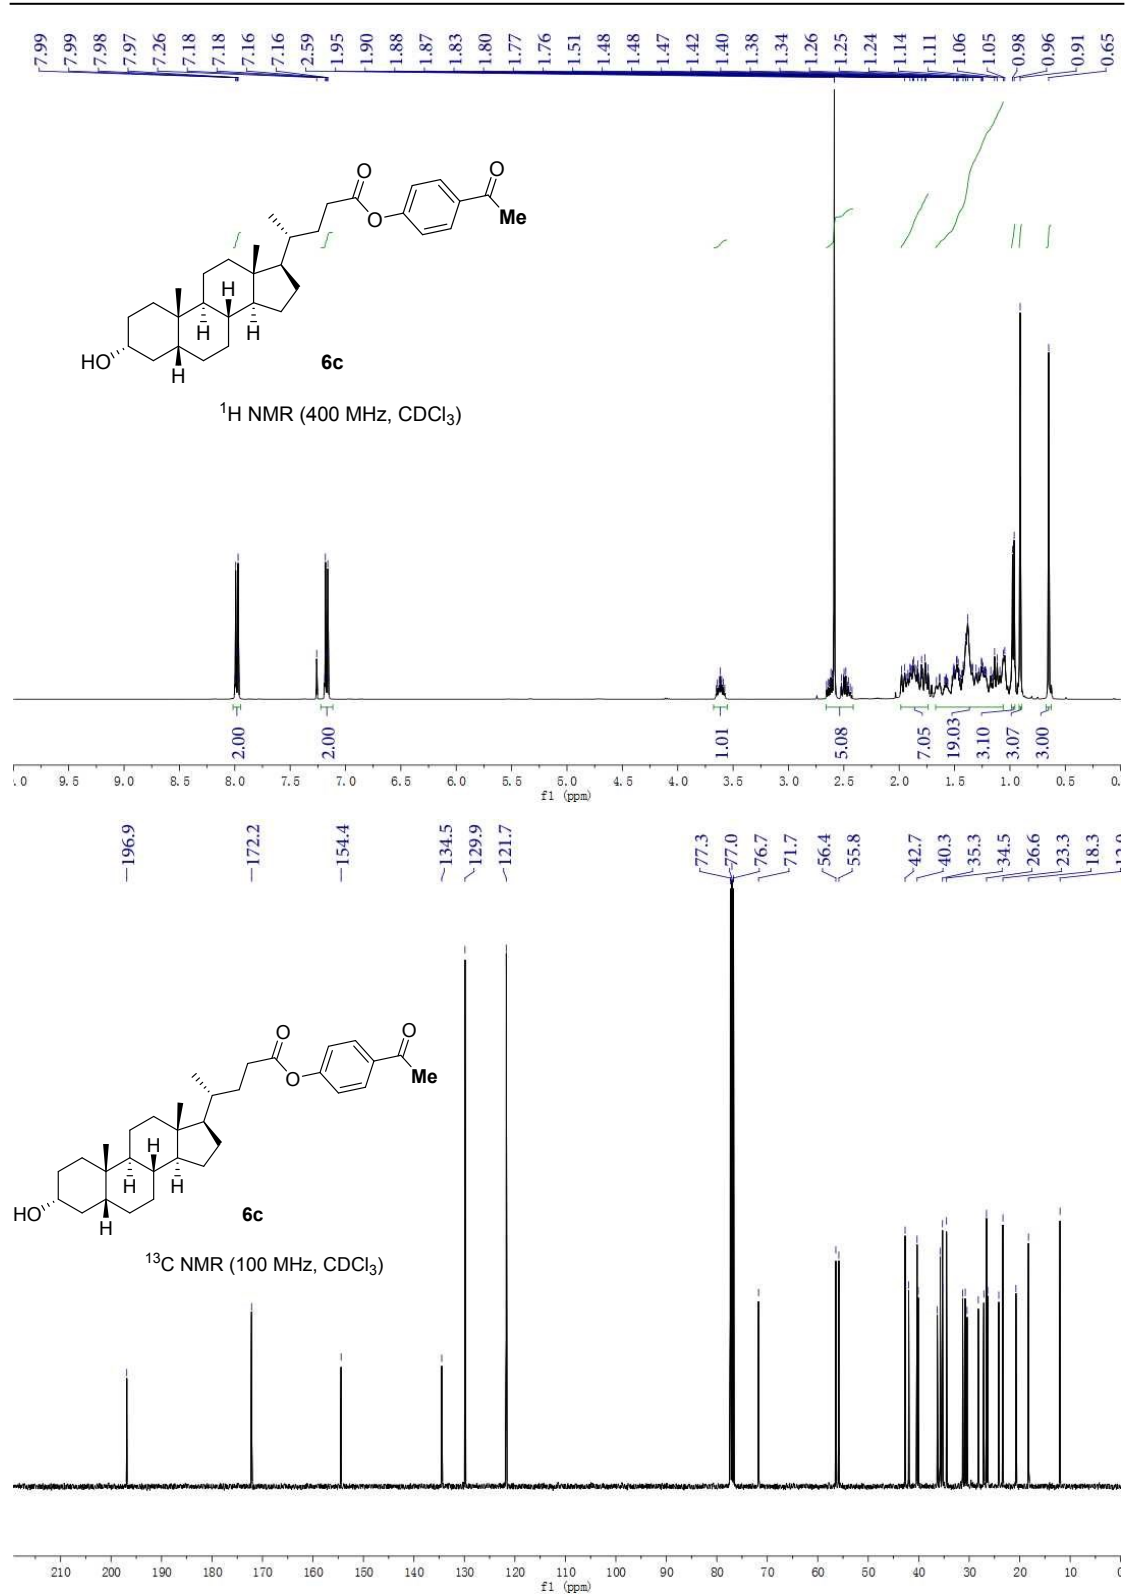

Supplement: d1cc01536b1.pdf [file d1cc01536b1.pdf]
